# Supplementary material for: A 60-year atmospheric nitrate isotope record from a southeastern Greenland ice core with minimal postdepositional alteration
Source: Copernicus journal article supplement (doi:10.5194/acp-25-5727-2025), 2025-06-11
Supplement: Supplementary file 1 [file acp-25-5727-2025-supplement.zip]

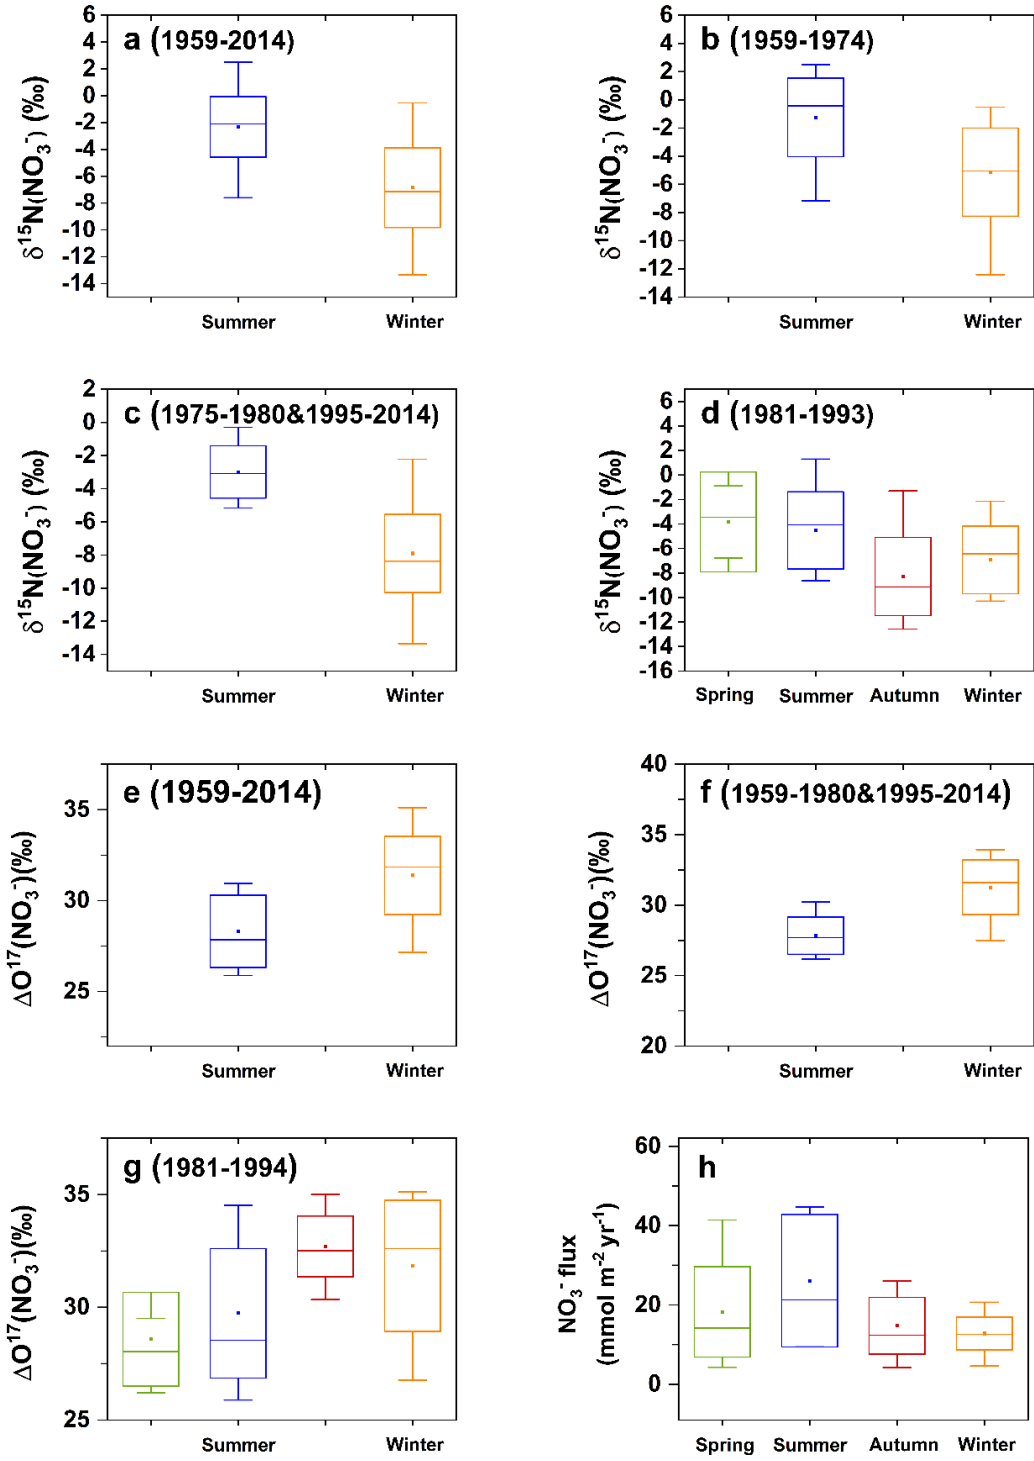

**Figure S1.** The seasonal change of observed  $\text{NO}_3^-$  isotopes and concentration SE-Dome ice core. (a)  $\delta^{15}\text{N}(\text{NO}_3^-)$  (1959-2014), (b)  $\delta^{15}\text{N}(\text{NO}_3^-)$  (1959-1974), (c)  $\delta^{15}\text{N}(\text{NO}_3^-)$  (1975-1980 & 1995-2014), (d)  $\delta^{15}\text{N}(\text{NO}_3^-)$  (1981-1993), (e)  $\Delta^{17}\text{O}(\text{NO}_3^-)$  (1959-2014), (f)  $\Delta^{17}\text{O}(\text{NO}_3^-)$  (1959-1980 & 1995-2014), (g)  $\Delta^{17}\text{O}(\text{NO}_3^-)$  (1981-1994) and (h) the  $\text{NO}_3^-$  flux ( $\text{mmol m}^{-2} \text{yr}^{-1}$ ).

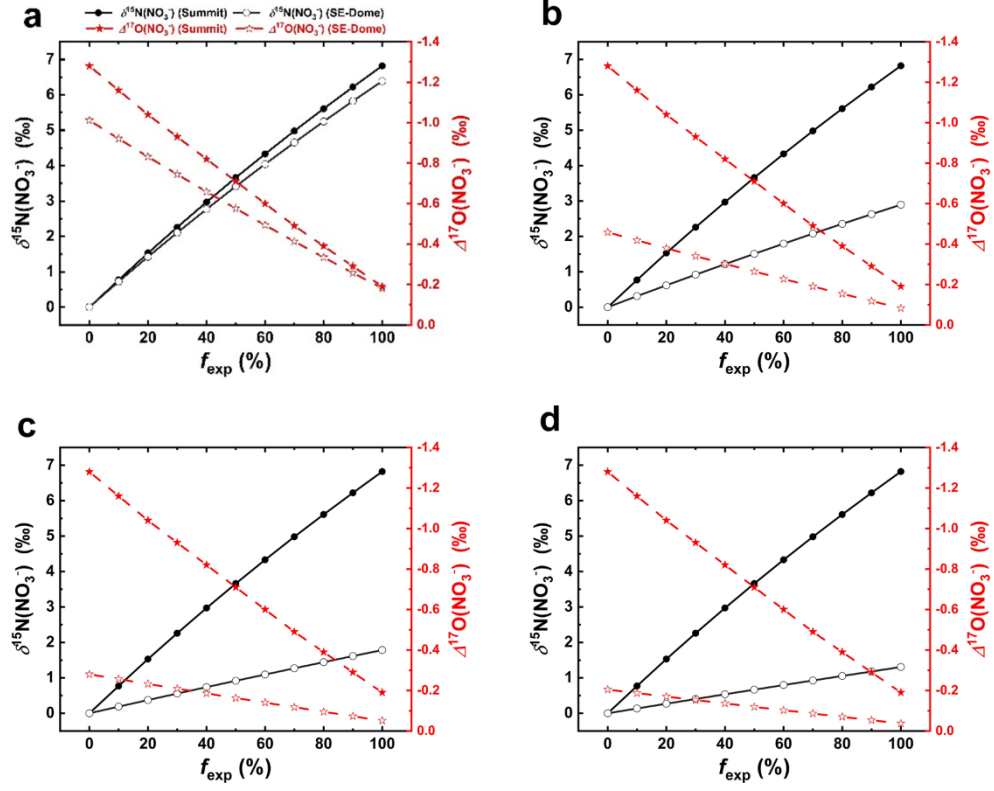

**Figure S2.** The sensitivity of the changes in  $\delta^{15}\text{N}(\text{NO}_3^-)$  and  $\Delta^{17}\text{O}(\text{NO}_3^-)$  of the ice-core nitrate to  $f_{\text{exp}}$  with different snow accumulation rate ( $A$ ). (a)  $A = 0.25 \text{ m w e a}^{-1}$  which equals to that in Summit; (b)  $A = 0.6 \text{ m w e a}^{-1}$ ; (c)  $A = 1.01 \text{ m w e a}^{-1}$ ; (d)  $A = 1.4 \text{ m w e a}^{-1}$ .

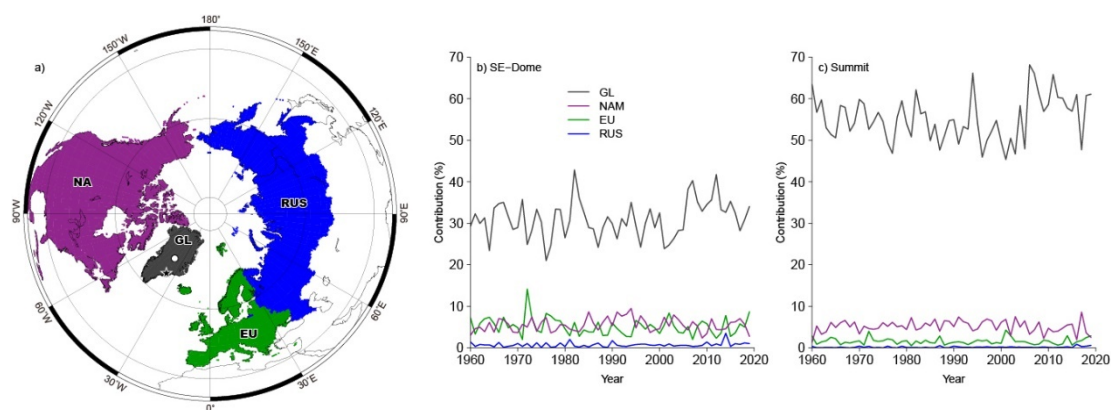

**Figure S3.** Time series of regional contributions of air mass origins for SE-Dome (b) and Summit 39 (c). The regions are shown at the top. Greenland in gray, North America in purple (Canada and the 40 U.S.), Europe (EU) in green, Russia in blue.

**Table S1** The samples and corresponding years

| Year | Seasonal | $\delta^{18}\text{O}$ | $\Delta^{17}\text{O}$ | $\delta^{15}\text{N}$ | Year | Seasonal | $\delta^{18}\text{O}$ | $\Delta^{17}\text{O}$ | $\delta^{15}\text{N}$ |
|------|----------|-----------------------|-----------------------|-----------------------|------|----------|-----------------------|-----------------------|-----------------------|
| 1959 | summer   | 79                    | 27.4                  | 0.5                   | 1988 | spring   | 88.5                  | 32.8                  | -3.4                  |
| 1959 | winter   | 76.6                  | 26.5                  | -1.2                  | 1988 | summer   | 86.7                  | 33.4                  | -6.2                  |
| 1960 | summer   | 83.1                  | 30                    | -4.3                  | 1988 | autumn   | 85.5                  | 34                    | -7.9                  |
| 1961 | winter   | 76.5                  | 27.2                  | -1.6                  | 1988 | winter   | 87.5                  | 33.9                  | -6.1                  |
| 1961 | summer   | 80.1                  | 27.7                  | -0.5                  | 1989 | spring   | 80.9                  | 29                    | -2.4                  |
| 1962 | winter   | 78.1                  | 27.5                  | -0.5                  | 1989 | summer   | 86.8                  | 34.5                  | -8.6                  |
| 1962 | summer   | 77.7                  | 28.4                  | 1.4                   | 1989 | autumn   | 80.9                  | 30.3                  | -1.3                  |
| 1963 | winter   | 87.1                  | 33.9                  | -3.4                  | 1989 | winter   | 83.9                  | 31.9                  | -5.3                  |
| 1963 | summer   | 76.6                  | 27.8                  | 2                     | 1990 | spring   | 74                    | 26.2                  | -3.1                  |
| 1964 | winter   | 85.9                  | 33.4                  | -2                    | 1990 | summer   | 77.8                  | 30                    | -8.3                  |
| 1964 | summer   | 76.5                  | 26.7                  | 0.1                   | 1990 | autumn   | 86                    | 32.6                  | -9.7                  |
| 1965 | winter   | 79.8                  | 31.5                  | -4.4                  | 1991 | spring   | 74.7                  | 28                    | -1.6                  |
| 1965 | summer   | 80.7                  | 30.2                  | 2.5                   | 1991 | summer   | 70.4                  | 25.9                  | -0.5                  |
| 1966 | winter   | 77                    | 30.7                  | -6                    | 1991 | autumn   | 84.3                  | 32.5                  | -9.1                  |
| 1966 | summer   | 73                    | 26.9                  | -0.3                  | 1991 | winter   | 83.7                  | 32.8                  | -6.4                  |
| 1967 | winter   | 80.3                  | 31.1                  | -7.4                  | 1992 | spring   | 79.3                  | 29.5                  | 4.8                   |
| 1967 | summer   | 73.7                  | 26.6                  | -1.4                  | 1992 | summer   | 78.6                  | 28.1                  | -6.3                  |
| 1968 | winter   | 79.8                  | 30.4                  | -4.1                  | 1992 | autumn   | 82.8                  | 32                    | -7.9                  |
| 1968 | summer   | 76                    | 27.4                  | -1.8                  | 1993 | summer   | 87                    | 34.2                  | -8.6                  |
| 1969 | winter   | 80.9                  | 30.9                  | -5.7                  | 1993 | autumn   | 85.6                  | 34.5                  | -9.8                  |
| 1969 | summer   | 73                    | 26.4                  | -0.3                  | 1993 | winter   | 84.7                  | 32.6                  | -10                   |
| 1970 | winter   | 83.9                  | 32                    | -4.3                  | 1994 | spring   | 76                    | 27.8                  | -0.9                  |
| 1970 | summer   | 75.8                  | 27.2                  | -1.8                  | 1994 | summer   | 78.9                  | 28.2                  | -4                    |
| 1971 | winter   | 82.3                  | 32.1                  | -7                    | 1994 | winter   | 82.4                  | 29.5                  | -4.4                  |
| 1971 | summer   | 75.8                  | 27.4                  | 0.8                   | 1994 | autumn   | 83.4                  | 31.2                  | -9.1                  |
| 1972 | winter   | 82.3                  | 32.7                  | -9                    | 1995 | summer   | 83.1                  | 31.7                  | -7.6                  |
| 1972 | summer   | 74.3                  | 26.6                  | -7.2                  | 1996 | winter   | 78.1                  | 29.4                  | -5.7                  |
| 1973 | winter   | 78.9                  | 30.4                  | -6.2                  | 1996 | summer   | 77.3                  | 28.1                  | -1.9                  |
| 1973 | summer   | 75.7                  | 27.6                  | -4.1                  | 1997 | winter   | 82.7                  | 32.7                  | -9.2                  |
| 1974 | winter   | 79.2                  | 30.4                  | -7.1                  | 1997 | summer   | 78                    | 28.2                  | -0.5                  |
| 1974 | summer   | 75.6                  | 27.7                  | -5.8                  | 1998 | winter   | 82.3                  | 32.2                  | -9.7                  |
| 1975 | winter   | 79.7                  | 31.8                  | -12.4                 | 1998 | summer   | 77.2                  | 27.6                  | -1.6                  |
| 1975 | summer   | 80.6                  | 28.9                  | -0.3                  | 1999 | winter   | 83.1                  | 31.6                  | -4.8                  |
| 1976 | winter   | 80.9                  | 30.4                  | -8.3                  | 1999 | summer   | 78.4                  | 28.7                  | -1.2                  |
| 1976 | summer   | 75.4                  | 26.9                  | -3                    | 2000 | winter   | 83                    | 32.3                  | -8.6                  |
| 1977 | winter   | 81.5                  | 31.4                  | -12.8                 | 2000 | summer   | 74.9                  | 27.6                  | -3                    |
| 1977 | summer   | 77.8                  | 28.2                  | -3.6                  | 2001 | winter   | 83.7                  | 32.9                  | -8.4                  |
| 1978 | winter   | 87.2                  | 32.5                  | -13.3                 | 2001 | summer   | 78.3                  | 29.5                  | -3.8                  |
| 1978 | summer   | 76.1                  | 27.9                  | -2                    | 2002 | winter   | 81.1                  | 31.1                  | -9                    |
| 1979 | winter   | 85.5                  | 33                    | -9.2                  | 2002 | summer   | 74.1                  | 26.7                  | -4.2                  |
| 1979 | summer   | 76.6                  | 27.8                  | -4.7                  | 2003 | winter   | 80.9                  | 31.8                  | -9.7                  |
| 1980 | winter   | 84.1                  | 32.9                  | -8.6                  | 2003 | summer   | 76.9                  | 28.4                  | -3.2                  |

| Year | Seasonal | $\delta^{18}\text{O}$ | $\Delta^{17}\text{O}$ | $\delta^{15}\text{N}$ | Year | Seasonal | $\delta^{18}\text{O}$ | $\Delta^{17}\text{O}$ | $\delta^{15}\text{N}$ |
|------|----------|-----------------------|-----------------------|-----------------------|------|----------|-----------------------|-----------------------|-----------------------|
| 1980 | summer   | 74.6                  | 26.7                  | -3.7                  | 2004 | winter   | 81.7                  | 31.4                  | -6                    |
| 1981 | winter   | 80.7                  | 31                    | -7.2                  | 2004 | summer   | 76.6                  | 27.8                  | -2.2                  |
| 1981 | spring   | 77.5                  | 28.8                  | -4.6                  | 2005 | winter   | 82.7                  | 31.3                  | -5.4                  |
| 1981 | summer   | 75.1                  | 27.3                  | -2.4                  | 2005 | summer   | 81.7                  | 30.9                  | -5.2                  |
| 1981 | autumn   | 84.7                  | 33.9                  | -12.6                 | 2006 | winter   | 80.2                  | 30.1                  | -2.2                  |
| 1981 | winter   | 74.6                  | 26.8                  | -2.1                  | 2006 | summer   | 76.9                  | 27.9                  | -1.9                  |
| 1982 | Spring   | 76.1                  | 28.2                  | -4.4                  | 2007 | winter   | 82.2                  | 32.1                  | -6.8                  |
| 1982 | summer   | 81.3                  | 31.9                  | -7.5                  | 2007 | summer   | 75.7                  | 28.8                  | -3.5                  |
| 1982 | autumn   | 83.2                  | 32.1                  | -9.5                  | 2008 | winter   | 82.6                  | 33.5                  | -9.1                  |
| 1982 | winter   | 72.3                  | 26.8                  | -4.6                  | 2008 | summer   | 77.1                  | 28.8                  | -3.7                  |
| 1983 | Spring   | 72.1                  | 26.8                  | -3.2                  | 2009 | winter   | 78.1                  | 31.6                  | -9                    |
| 1983 | summer   | 80.1                  | 28.9                  | -2.3                  | 2009 | summer   | 71.7                  | 27.3                  | -3.6                  |
| 1983 | autumn   | 87                    | 33.6                  | -6.1                  | 2010 | winter   | 80.9                  | 32.8                  | -7.3                  |
| 1983 | winter   | 86.4                  | 34.1                  | -10.3                 | 2010 | summer   | 74.7                  | 28.1                  | -4                    |
| 1984 | Spring   | 76.3                  | 27.8                  | -6.8                  | 2011 | winter   | 81.9                  | 32.5                  | -5                    |
| 1984 | Summer   | 73.7                  | 27.6                  | -3.9                  | 2011 | summer   | 70.2                  | 26.2                  | -2.4                  |
| 1984 | autumn   | 83.1                  | 31.5                  | -3.3                  | 2012 | winter   | 82.8                  | 33.6                  | -7.7                  |
| 1984 | winter   | 82.7                  | 32.3                  | -9.4                  | 2012 | summer   | 73.6                  | 27.2                  | -1.4                  |
| 1985 | Spring   | 71.5                  | 27.6                  | -5.5                  | 2013 | winter   | 75.1                  | 29.8                  | -8.4                  |
| 1985 | summer   | 73.7                  | 26.7                  | -2                    | 2013 | summer   | 73.7                  | 26.8                  | -1.6                  |
| 1985 | autumn   | 82.8                  | 31.8                  | -6.2                  | 2014 | winter   | 65.1                  | 24.6                  | -6.3                  |
| 1985 | winter   | 86.2                  | 34.4                  | -7.4                  | 2014 | summer   | 67                    | 24.2                  | -3.9                  |
| 1986 | Spring   | 70                    | 26.2                  | -5.3                  | 2015 | winter   | 82.1                  | 32.4                  | -7.5                  |
| 1986 | summer   | 83.7                  | 31.4                  | -4.2                  |      |          |                       |                       |                       |
| 1986 | autumn   | 89.6                  | 35                    | -11.4                 |      |          |                       |                       |                       |
| 1987 | spring   | 81.4                  | 32.7                  | -13.5                 |      |          |                       |                       |                       |
| 1987 | summer   | 77.4                  | 28.2                  | 1.3                   |      |          |                       |                       |                       |
| 1987 | autumn   | 83.4                  | 32.9                  | -11.9                 |      |          |                       |                       |                       |
| 1987 | winter   | 90.4                  | 35.1                  | -10.1                 |      |          |                       |                       |                       |
| 1988 | spring   | 88.5                  | 32.8                  | -3.4                  |      |          |                       |                       |                       |
| 1988 | summer   | 86.7                  | 33.4                  | -6.2                  |      |          |                       |                       |                       |
| 1988 | autumn   | 85.5                  | 34                    | -7.9                  |      |          |                       |                       |                       |
| 1988 | winter   | 87.5                  | 33.9                  | -6.1                  |      |          |                       |                       |                       |

**Table S2** Parameters used for calculating  $f_{\text{exp}}$  in Summit and SE-Dome ice core

| Parameters | Parameters     | Description                                                  | Value          | Unit                   | Data origin                                                                    |
|------------|----------------|--------------------------------------------------------------|----------------|------------------------|--------------------------------------------------------------------------------|
| Summit     | $L$            | Summer boundary layer height                                 | 3.50E+05       | m                      | Honrath et al., 2002                                                           |
|            | $V_d$          | The dry deposition velocity of $\text{HNO}_3$                | 0.0063         | $\text{m s}^{-1}$      | Björkman et al., 2013                                                          |
|            | $k[\text{OH}]$ | The rate constant for the $\text{NO}_2 + \text{OH}$ reaction | 1.09373E-11    |                        | Atkinson et al., 2004                                                          |
|            | $V_h$          | Mean horizontal wind speed                                   | 5              | $\text{m s}^{-1}$      | Mcdowell et al., 2020                                                          |
|            | $[\text{OH}]$  | Measured average OH radical concentration in summer          | 6.30E+06       | $\text{mloec cm}^{-3}$ | Sjostedt et al., 2006                                                          |
|            | $H$            | Horizontal characteristic                                    | 156            | m                      | Characteristic length of summit of the Greenland ice cap; Honrath et al., 2002 |
| SE-Dome    | $L$            | Summer boundary layer height                                 | Same as Summit | m                      | -                                                                              |
|            | $V_d$          | The dry deposition velocity of $\text{HNO}_3$                | Same as Summit | $\text{m s}^{-1}$      |                                                                                |
|            | $k[\text{OH}]$ | The rate constant for the $\text{NO}_2 + \text{OH}$ reaction | 1.13E-11       |                        | ERA5(Hersbach et al., (2020); Khalzan et al., (2022))                          |
|            | $V_h$          | Mean horizontal wind speed                                   | 5.2            | $\text{m s}^{-1}$      |                                                                                |
|            | $[\text{OH}]$  | Measured average OH radical concentration in summer          | 1.02E+06       | $\text{mloec cm}^{-3}$ |                                                                                |
|            | $H$            | Horizontal characteristic                                    | 235.31         | m                      |                                                                                |

## References :

- Atkinson, R., Baulch, D. L., Cox, R. A., Crowley, J. N., Hampson, R. F., Hynes, R. G., Jenkin, M. E., Rossi, M. J., and Troe, J.: Evaluated kinetic and photochemical data for atmospheric chemistry: Volume I – gas phase reactions of Ox, HOx, NOx and SOx species, *Atmos. Chem. Phys.*, 4, 1461–1738, <https://doi.org/10.5194/acp-4-1461-2004>, 2004. Z
- Björkman, M., Kühnel, R., Partridge, D., Roberts, T., Aas, W., Mazzola, M., Viola, A., Hodson, A., Ström, J., and Isaksson, E.: Nitrate dry deposition in Svalbard, *Tellus B*, 65, 19071, <https://doi.org/10.3402/tellusb.v65i0.19071>, 2013.
- Hersbach, H., Bell, B., Berrisford, P., Hirahara, S., Horányi, A., Muñoz-Sabater, J., Nicolas, J., Peubey, C., Radu, R., Schepers, D., Simmons, A., Soci, C., Abdalla, S., Abellan, X., Balsamo, G., Bechtold, P., Biavati, G., Bidlot, J., Bonavita, M., De Chiara, G., Dahlgren, P., Dee, D., Diamantakis, M., Dragani, R., Flemming, J., Forbes, R., Fuentes, M., Geer, A., Haimberger, L., Healy, S., Hogan, R. J., Holm, E., Janisková, M., Keeley, S., Laloyaux, P., Lopez, P., Lupu, C., Radnoti, G., de Rosnay, P., Rozum, I., Vamborg, F., Villaume, S., and Thépaut, J.-N.: The ERA5 global reanalysis, *Q. J. R. Meteorol. Soc.*, 146, 1999–2049, doi:10.1002/qj.3803, 2020.
- Honrath, R., Lu, Y., Peterson, M. C., Dibb, J. E., Arsenault, M., Cullen, N., and Steffen, K.: Vertical fluxes of NOx, HONO, and HNO3 above the snowpack at Summit, Greenland, *Atmos. Environ.*, 36, 2629–2640, [https://doi.org/10.1016/S1352-2310\(02\)00132-2](https://doi.org/10.1016/S1352-2310(02)00132-2), 2002.
- Kahl, J. D. W., Martinez, D. A., Kuhns, H., Davidson, C. I., Jaffrezo, J.-L., and Harris, J. M.: Air mass trajectories to Summit, Greenland: A 44-year climatology and some episodic events, *J. Geophys. Res. Oceans*, 102, 26861–26875, <https://doi.org/10.1029/97JC00296>, 1997.
- McDowell, I. E., Albert, M. R., Lieblappen, S. A., and Keegan, K. M.: Local Weather Conditions Create Structural Differences between Shallow Firn Columns at Summit, Greenland and WAIS Divide, Antarctica, *Atmosphere*, 11, 1370, <https://doi.org/10.3390/atmos11121370>, 2020.
- Sjostedt, S.J.; Huey, L.G.; Tanner, D.J.; Peischl, J.; Chen, G.; Dibb, J.E.; Lefer, B.; Hutterli, M.A.; Beyersdorf, A.J.; Blake, N.J.; Blake, D.R.; Sueper, D.; Ryerson, T.; Burkhardt, J.; Stohl, A. Observations of hydroxyl and the sum of peroxy radicals at Summit, Greenland during summer 2003. *Atmos. Environ.*, 41(24), 5122–5137. 10.1016/j.atmosenv.2006.06.065, 2007.
