# Supplementary material for: A 60-year atmospheric nitrate isotope record from a southeastern Greenland ice core with minimal postdepositional alteration
Source: Copernicus journal article supplement (doi:10.5194/acp-25-5727-2025), 2025-06-11
Supplement: Supplementary file 1 [file acp-25-5727-2025-supplement.zip]

## Sheet: Cover
	Title	A 60-year atmospheric nitrate isotope record from a Southeast Greenland ice core with minimal post-depositional alteration
	Auther	Zhao Wei1, Shohei Hattori1,2,3*, Asuka Tsuruta3, Zhuang Jiang4, Sakiko Ishino5, Koji Fujta6, Sumito Matoba7, Lei Geng4, Alexis Lamothe8, Ryu Uemura6, Naohiro Yoshida3,9, Joel Savarino8, and Yoshinori Iizuka7
	*Corresponding author (e-mail: hattori@nju.edu.cn)
	Fig. 1	(a) Map of the southeastern Dome (SE-Dome, star) and Summit (opened circle) sites in Greenland (Annual precipitation from ERA5 reanalysis climate data, Hersbach et al., 2020). Probability distributions for the air masses overlying the (b) SE-Dome and (c) Summit sites from 7-day three-dimensional back trajectory analysis based on HYSPLIT modeling (1960–2019). Detailed back trajectory analysis proc…
	Fig. 2	NO3− isotope data and fluxes from the SE-Dome ice core. (a) d15N(NO3−), (b) D17O(NO3−), and (c) NO3− flux (mmol m−2 a−1)
	Fig. 3	Sensitivity of the changes in δ15N(NO3−) and D17O(NO3−) of the ice-core nitrate to fexp. Positive/negative values indicate deviations from initial deposition. The shaded area in the SE-Dome calculations represents results obtained using snow accumulation rates of 0.6 and 1.4 m w e a⁻¹.
	Fig. 4	TRANSITS model results for the SE -Dome site. (a) NO3− concentration, (b) δ15N(NO3−), and (c) D17O(NO3−). The black and red lines represent the variations calculated without and with NO3− photolysis, respectively.
	Fig. 5	d15N(NO3−) values obtained from the SE-Dome (this study) and Summit (Hastings et al., 2009; Geng et al., 2014) ice cores. The shaded area for δ15N(NO3−) values in SE-Dome represents the propagated errors of the annual average, based on seasonal concentration and δ15N variations
	Fig. S1	The seasonal change of observed NO3− isotopes and concentration SE-Dome ice core. (a) d15N(NO3−) (1959-2014), (b) d15N(NO3−) (1959-1974), (c) d15N(NO3−) (1975-1980 & 1995-2014), (d) d15N(NO3−) (1981-1993), (e) D17O(NO3−) (1959-2014), (f) D17O(NO3−) (1959-1980 & 1995-2014), (g) D17O(NO3−) (1981-1994) and (h) the NO3− flux (mmol m−2 yr−1)
	Fig. S2	The sensitivity of the changes in δ15N(NO3−) and D17O(NO3−) of the ice-core nitrate to fexp with different snow accumulation rate (A). (a) A = 0.25 m w.e. which equals to that in Summit. (b) A = 0.6 m w.e. (c) A = 1.01 m w.e. (d) A = 1.4 m w.e. Positive/negative values indicate deviations from initial deposition.
	Fig. S3	Time series of regional contributions of air mass origins for SE-Dome (b) and Summit (c). The regions are shown at the top. Greenland in gray, North America in purple (Canada and the U.S.), Europe (EU) in green, Russia in blue.
	Reference:	Furukawa, R., Uemura, R., Fujita, K., Sjolte, J., Yoshimura, K., Matoba, S., & Iizuka, Y. (2017). Seasonal-scale dating of a shallow ice core from Greenland using oxygen isotope matching between data and simulation. Journal of Geophysical Research: Atmospheres, 122(20), 10, 873887. https://doi.org/10.1002/2017jd026716
		Geng, L., Alexander, B., Cole-Dai, J., Steig, E. J., Savarino, J., Sofen, E. D., & Schauer, A. J. (2014). Nitrogen isotopes in ice core nitrate linked to anthropogenic atmospheric acidity change. Proceedings of the National Academy of Sciences of the United States of America, 111(16), 5808-5812. https://doi.org/10.1073/pnas.1319441111
		Hastings, M. G., Jarvis, J. C., & Steig, E. J. (2009). Anthropogenic impacts on nitrogen isotopes of ice-core nitrate. Science, 324(5932), 1288. https://doi/10.1126/science.1170510
		Hersbach, H., Bell, B., Berrisford, P., Hirahara, S., Horányi, A., Muñoz‐Sabater, J., et al. (2020). The ERA5 global reanalysis. Quarterly Journal of the Royal Meteorological Society, 146(730), 1999-2049. https://doi.org/10.1002/qj.3803
		Iizuka, Y., Uemura, R., Fujita, K., Hattori, S., Seki, O., Miyamoto, C., … Matoba, S. (2018). A 60 year record of atmospheric aerosol depositions preserved in a high-accumulation dome ice core, Southeast Greenland. Journal of Geophysical Research: Atmospheres, 123(1), 574-589. https://doi.org/10.1002/2017JD026733

## Sheet: Figure 1
Figure NO.	Figure 1d	Unit	SE-Dome	Year	Snow accumulation rate		Summit	Year	Snow accumulation rate
		m w.e.		1960	1.32772			1959	0.247593
				1961	0.978704			1960	0.182477
				1962	0.880966			1961	0.245978
				1963	0.915973			1962	0.201643
				1964	1.14191			1963	0.230167
				1965	0.855427			1964	0.323818
				1966	0.648051			1965	0.163875
				1967	0.664618			1966	0.185204
				1968	0.858735			1967	0.201123
				1969	0.754762			1968	0.219585
				1970	0.93102			1969	0.243049
				1971	0.78786			1970	0.174598
				1972	1.31162			1971	0.189496
				1973	0.881993			1972	0.263331
				1974	0.802632			1973	0.17576
				1975	1.09822			1974	0.233038
				1976	1.12692			1975	0.26024
				1977	1.07181			1976	0.211738
				1978	0.98481			1977	0.261362
				1979	0.835627			1978	0.191777
				1980	0.898346			1979	0.209239
				1981	1.04909			1980	0.168862
				1982	0.639706			1981	0.233496
				1983	1.21627			1982	0.189019
				1984	1.45967			1983	0.231547
				1985	0.775984			1984	0.243375
				1986	0.939244			1985	0.201144
				1987	1.21037			1986	0.238814
				1988	0.933851			1987	0.234074
				1989	0.99515			1988	0.229827
				1990	1.10332			1989	0.223734
				1991	1.28856			1990	0.231474
				1992	1.19246			1991	0.238492
				1993	1.22619			1992	0.200044
				1994	0.738922			1993	0.13873
				1995	1.33071			1994	0.224291
				1996	0.975539			1995	0.283016
				1997	0.940713			1996	0.240933
				1998	0.965469			1997	0.21374
				1999	1.06919			1998	0.203556
				2000	0.872371			1999	0.30832
				2001	1.16792			2000	0.22657
				2002	1.32354			2001	0.237822
				2003	1.50535			2002	0.220252
				2004	0.918204			2003	0.281869
				2005	1.18066			2004	0.280006
				2006	0.905855			2005	0.206631
				2007	1.18219			2006	0.178739
				2008	1.3309			2007	0.0173145
				2009	1.03914
				2010	1.26944
				2011	0.790015
				2012	0.850285
				2013	1.03992
				2014	1.0622

## Sheet: Figure 2
Figure NO.	Figure 2a d15N(NO3-)	Unit (‰)									Figure 2b D17O(NO3-)	Unit (‰)									Figure 2c NO3- flux	Unit (mmol m−2 a−1)
			Year	Spring	Summer	Autumn	Winter	Mass weighted average					Year	Spring	Summer	Autumn	Winter	Mass weighted average					Year	Spring	Summer	Autumn	Winter
			2014		-3.94446		-7.47085	-5.10861					2014		24.1774		32.3871	26.8877					2014		0.9		0.443536
			2013		-1.5902		-6.27767	-3.5559					2013		26.845		24.6348	25.9181					2013		0.54513		0.3937
			2012		-1.40771		-8.40032	-3.89167					2012		27.1573		29.849	28.1135					2012		0.62763		0.345781
			2011		-2.39333		-7.67238	-4.28637					2011		26.1579		33.5649	28.814					2011		0.4774		0.266904
			2010		-3.97053		-5.03737	-4.45421					2010		28.1271		32.528	30.1224					2010		0.62471		0.518149
			2009		-3.5815		-7.32947	-5.4994					2009		27.3288		32.8041	30.1306					2009		0.51907		0.543981
			2008		-3.6577		-9.02699	-5.68366					2008		28.7968		31.6245	29.8637					2008		0.64574		0.3913
			2007		-3.53036		-9.12024	-5.58921					2007		28.7983		33.527	30.5399					2007		0.81632		0.475974
			2006		-1.85584		-6.81686	-3.89256					2006		27.8676		32.0879	29.6002					2006		0.59942		0.417483
			2005		-5.16989		-2.22764	-2.98378					2005		30.9432		30.0689	30.2936					2005		0.26765		0.773822
			2004		-2.16434		-5.38895	-2.91727					2004		27.845		31.2757	28.6461					2004		0.94745		0.288618
			2003		-3.16619		-6.03407	-4.64066					2003		28.3551		31.4336	29.9378					2003		0.61996		0.656028
			2002		-4.22331		-9.67772	-6.06108					2002		26.7393		31.809	28.4475					2002		1.17663		0.597898
			2001		-3.84849		-9.02154	-5.65297					2001		29.4665		31.066	30.0245					2001		0.72415		0.387914
			2000		-2.97828		-8.44776	-5.55708					2000		27.6471		32.9404	30.1428					2000		0.84748		0.756045
			1999		-1.24288		-8.64673	-4.54209					1999		28.7064		32.3001	30.3078					1999		0.57632		0.463232
			1998		-1.6		-4.80914	-3.04643					1998		27.6		31.5633	29.3863					1998		0.48103		0.394718
			1997		-0.5		-9.7	-4.66176					1997		28.2		32.2	30.0095					1997		0.63496		0.524498
			1996		-1.9		-9.2	-5.9135					1996		28.1		32.7	30.6291					1996		0.50101		0.611837
			1995		-7.6		-5.7	-6.92395					1995		31.7		29.4	30.8816					1995		1.13077		0.624578
			1994	-0.892273	-3.98987	-9.12339	-4.35909	-3.35663					1994	27.8461	28.2018	31.1503	29.4689	28.711					1994	0.589664	0.26963	0.167754	0.314228
			1993		-8.56921	-9.80579	-10.0477						1993		34.2246	34.4633	32.6064						1993	0.0721809	0.62983	0.574702	0.170865
			1992	4.78079	-6.2605	-7.90138							1992	29.5088	28.1224	32.0074							1992	1.38002	0.43203	0.330029	0.0842682
			1991	-1.59118	-0.467724	-9.14985	-6.42491	-2.9209					1991	28.0429	25.8837	32.4657	32.8495	28.3129					1991	0.291305	0.74156	0.249701	0.185831
			1990	-3.13272	-8.25951	-9.66952							1990	26.2025	29.951	32.556							1990	0.746068	0.85424	0.1973	0.11394
			1989	-2.37819	-8.62252	-1.30253	-5.30448	-3.65692					1989	28.9803	34.5276	30.346	31.9472	30.5923					1989	0.55063	0.17469	0.197944	0.183728
			1988	-3.43677	-6.16694	-7.91848	-6.12217	-5.83788					1988	32.7761	33.4407	34.0227	33.8769	33.4525					1988	0.209103	0.56745	0.12725	0.177976
			1987	-13.5437	1.29587	-11.9426	-10.1141	-1.78516					1987	32.6526	28.2196	32.9036	35.1201	29.4872					1987	0.220636	1.97361	0.160554	0.222785
			1986	-5.34619	-4.16897	-11.4105							1986	26.2264	31.3972	35.0093							1986	0.168071	0.04242	0.149924	0.0548103
			1985	-5.45849	-2.02809	-6.19459	-7.36732	-5.09199					1985	27.6339	26.6561	31.8051	34.3957	29.0587					1985	0.535616	0.24945	0.188553	0.158258
			1984	-6.77199	-3.87327	-3.26177	-9.42613	-4.85563					1984	27.8094	27.6076	31.476	32.279	28.6504					1984	0.245059	0.9081	0.199864	0.162131
			1983	-3.15536	-2.25747	-6.08697	-10.2971	-4.9408					1983	26.7996	28.8543	33.6039	34.1292	30.1714					1983	0.337811	0.29506	0.192233	0.219283
			1982	-4.37461	-7.47091	-9.54581	-4.5945	-5.71061					1982	28.2467	31.9131	32.1065	26.7674	29.0173					1982	0.400659	0.20603	0.136962	0.315978
			1981	-4.59953	-2.41844	-12.5722	-2.14235	-4.69413					1981	28.797	27.2925	33.9211	26.8045	28.7749					1981	0.446429	0.39951	0.162461	0.128727
			1980		-3.72489		-7.2	-4.71948					1980		26.7291		31	27.9515					1980		0.678355		0.271991
			1979		-4.7		-8.6	-6.49474					1979		27.8		32.9	30.147					1979		0.50676		0.432013
			1978		-2.0337		-9.20342	-4.65896					1978		27.9362		32.9515	29.7726					1978		0.72474		0.41867
			1977		-3.57517		-13.3475	-6.29188					1977		28.1706		32.5037	29.3752					1977		1.08285		0.416943
			1976		-3		-12.7757	-7.81282					1976		26.9		31.4294	29.13					1976		0.59732		0.579258
			1975		-0.296292		-8.34024	-3.48959					1975		28.8737		30.3828	29.4728					1975		0.58139		0.382743
			1974		-5.77769		-12.4086	-8.93043					1974		27.6989		31.8461	29.6707					1974		0.34969		0.316969
			1973		-4.13624		-7.06362	-5.13231					1973		27.5971		30.3699	28.5406					1973		0.51455		0.265377
			1972		-7.17278		-6.1823	-6.69388					1972		26.5772		30.3872	28.4194					1972		0.5897		0.552044
			1971		0.819181		-8.97448	-4.25602					1971		27.4476		32.7128	30.1761					1971		0.39603		0.425971
			1970		-1.75768		-7.02957	-3.35491					1970		27.2062		32.053	28.6746					1970		0.62671		0.272406
			1969		-0.25743		-4.27044	-2.39599					1969		26.4234		31.9744	29.3816					1969		0.31042		0.35416
			1968		-1.76268		-5.66052	-2.58541					1968		27.3918		30.8503	28.1218					1968		0.81322		0.217572
			1967		-1.36208		-4.07014	-2.70101					1967		26.5712		30.3701	28.4495					1967		0.30888		0.302067
			1966		-0.287475		-7.40513	-2.58024					1966		26.9126		31.0561	28.2473					1966		0.55626		0.264331
			1965		2.49769		-5.99903	-0.590008					1965		30.2404		30.6557	30.3913					1965		0.43831		0.250206
			1964		0.07006		-4.43368	-1.80866					1964		26.6667		31.5051	28.685					1964		0.70744		0.506311
			1963		2.02699		-1.98702	-0.123893					1963		27.8373		33.3604	30.7968					1963		0.5131		0.592347
			1962		1.36199		-3.41215	-0.255632					1962		28.4431		33.9374	30.3047					1962		0.64971		0.332958
			1961		-0.546864		-0.526834	-0.540377					1961		27.6879		27.4977	27.6263					1961		0.67438		0.32302
			1960		-4.28145		-1.59543	-3.48469					1960		30.0391		27.1555	29.1837					1960		0.98464		0.415254
			1959		0.485682		-1.15077	-0.120931					1959		27.4113		26.4787	27.0656					1959		0.52282		0.307961
					-2.87488		-6.86495
					2.63109		2.8735

## Sheet: Figure 3
Figure 3	Unit (‰)		SE-Dome		A = 0.6 m w.e.	A = 1.01 m w.e.	A = 1.4 m w.e.		A = 0.6 m w.e.	A = 1.01 m w.e.	A = 1.4 m w.e.		Summit
				fexp	d15N(NO3-)	d15N(NO3-)	d15N(NO3-)		D17O(NO3-)	D17O(NO3-)	D17O(NO3-)			fexp	d15N(NO3-)	D17O(NO3-)
				0	8.46568e-08	-2.11642e-08	1.05821e-08		-0.457941	-0.280262	-0.204369			0	0	-1.28
				0.1	0.311967	0.187631	0.135669		-0.418106	-0.256376	-0.187132			0.1	0.77	-1.16
				0.2	0.618705	0.373135	0.270177		-0.378807	-0.23271	-0.170023			0.2	1.53	-1.04
				0.3	0.920315	0.556541	0.403537		-0.340036	-0.209263	-0.153036			0.3	2.26	-0.93
				0.4	1.2169	0.73788	0.535761		-0.301783	-0.186031	-0.136166			0.4	2.97	-0.82
				0.5	1.50855	0.917184	0.666863		-0.264048	-0.163012	-0.119413			0.5	3.66	-0.71
				0.6	1.79537	1.09448	0.796856		-0.226814	-0.140209	-0.102783			0.6	4.33	-0.6
				0.7	2.07744	1.2698	0.925752		-0.190084	-0.11762	-0.0862694			0.7	4.98	-0.49
				0.8	2.35487	1.44317	1.05356		-0.153837	-0.0952301	-0.0698681			0.8	5.61	-0.39
				0.9	2.62774	1.61461	1.1803		-0.118082	-0.0730534	-0.0535793			0.9	6.22	-0.29
				1	2.89615	1.78417	1.30598		-0.0827961	-0.0510731	-0.0374088			1	6.82	-0.19

## Sheet: Figure 4
Figure NO.	Figure 4a (NO3-) concentration	Unit (mmol m-2 yr-1)					Figure 4b d15N(NO3-)	Unit (‰)					Figure 4c (NO3-) D17O(NO3-)	Unit (‰)
			Depth (m)	Base case	No photolysis				Depth (m)	Base case	No photolysis				Depth (m)	Base case	No photolysis
			0.0005	1.66904	1.66418				0.0005	-0.20943	0				0.0005	29.7121	30
			0.0015	1.66925	1.66418				0.0015	-0.21622	0				0.0015	29.7124	30
			0.0025	1.66964	1.66418				0.0025	-0.22905	0				0.0025	29.7128	30
			0.0035	1.67001	1.66418				0.0035	-0.24105	0				0.0035	29.7132	30
			0.0045	1.67037	1.66418				0.0045	-0.2529	0				0.0045	29.7136	30
			0.0055	1.67074	1.66418				0.0055	-0.26465	0				0.0055	29.714	30
			0.0065	1.6711	1.66418				0.0065	-0.27631	0				0.0065	29.7143	30
			0.0075	1.67145	1.66418				0.0075	-0.28787	0				0.0075	29.7147	30
			0.0085	1.67181	1.66418				0.0085	-0.29934	0				0.0085	29.7151	30
			0.0095	1.67216	1.66418				0.0095	-0.31072	0				0.0095	29.7155	30
			0.0105	1.6725	1.66418				0.0105	-0.32201	0				0.0105	29.7159	30
			0.0115	1.67285	1.66418				0.0115	-0.33321	0				0.0115	29.7162	30
			0.0125	1.67319	1.66418				0.0125	-0.34431	0				0.0125	29.7166	30
			0.0135	1.67353	1.66418				0.0135	-0.35533	0				0.0135	29.717	30
			0.0145	1.67386	1.66418				0.0145	-0.36626	0				0.0145	29.7173	30
			0.0155	1.6742	1.66418				0.0155	-0.37709	0				0.0155	29.7177	30
			0.0165	1.67453	1.66418				0.0165	-0.38785	0				0.0165	29.718	30
			0.0175	1.67486	1.66418				0.0175	-0.39851	0				0.0175	29.7184	30
			0.0185	1.67518	1.66418				0.0185	-0.40909	0				0.0185	29.7187	30
			0.0195	1.6755	1.66418				0.0195	-0.41959	0				0.0195	29.7191	30
			0.0205	1.67582	1.66418				0.0205	-0.42981	0				0.0205	29.7194	30
			0.0215	1.67612	1.66418				0.0215	-0.43981	0				0.0215	29.7197	30
			0.0225	1.67643	1.66418				0.0225	-0.4498	0				0.0225	29.7201	30
			0.0235	1.67674	1.66418				0.0235	-0.4598	0				0.0235	29.7204	30
			0.0245	1.67704	1.66418				0.0245	-0.4698	0				0.0245	29.7207	30
			0.0255	1.67735	1.66418				0.0255	-0.4798	0				0.0255	29.721	30
			0.0265	1.67766	1.66418				0.0265	-0.4898	0				0.0265	29.7214	30
			0.0275	1.67796	1.66418				0.0275	-0.4998	0				0.0275	29.7217	30
			0.0285	1.67827	1.66418				0.0285	-0.5098	0				0.0285	29.722	30
			0.0295	1.67858	1.66418				0.0295	-0.5198	0				0.0295	29.7223	30
			0.0305	1.67887	1.66418				0.0305	-0.52941	0				0.0305	29.7227	30
			0.0315	1.67915	1.66418				0.0315	-0.53863	0				0.0315	29.723	30
			0.0325	1.67943	1.66418				0.0325	-0.54785	0				0.0325	29.7233	30
			0.0335	1.67972	1.66418				0.0335	-0.55707	0				0.0335	29.7236	30
			0.0345	1.68	1.66418				0.0345	-0.56629	0				0.0345	29.7239	30
			0.0355	1.68028	1.66418				0.0355	-0.57552	0				0.0355	29.7242	30
			0.0365	1.68056	1.66418				0.0365	-0.58474	0				0.0365	29.7245	30
			0.0375	1.68085	1.66418				0.0375	-0.59396	0				0.0375	29.7248	30
			0.0385	1.68113	1.66418				0.0385	-0.60318	0				0.0385	29.7251	30
			0.0395	1.68141	1.66418				0.0395	-0.61241	0				0.0395	29.7254	30
			0.0405	1.68168	1.66418				0.0405	-0.62127	0				0.0405	29.7257	30
			0.0415	1.68194	1.66418				0.0415	-0.62977	0				0.0415	29.7259	30
			0.0425	1.6822	1.66418				0.0425	-0.63827	0				0.0425	29.7262	30
			0.0435	1.68246	1.66418				0.0435	-0.64678	0				0.0435	29.7265	30
			0.0445	1.68272	1.66418				0.0445	-0.65528	0				0.0445	29.7267	30
			0.0455	1.68298	1.66418				0.0455	-0.66378	0				0.0455	29.727	30
			0.0465	1.68324	1.66418				0.0465	-0.67229	0				0.0465	29.7273	30
			0.0475	1.6835	1.66418				0.0475	-0.68079	0				0.0475	29.7276	30
			0.0482788	1.6837	1.66418				0.0482788	-0.68742	0				0.0482788	29.7278	30
			0.0490577	1.63587	1.66418				0.0490577	0.95226	0				0.0490577	29.6991	30
			0.0500577	1.63633	1.66418				0.0500577	0.93695	0				0.0500577	29.6996	30
			0.0510577	1.63695	1.66418				0.0510577	0.9162	0				0.0510577	29.7003	30
			0.0520577	1.63755	1.66418				0.0520577	0.89629	0				0.0520577	29.7009	30
			0.0530577	1.63814	1.66418				0.0530577	0.87653	0				0.0530577	29.7016	30
			0.0540577	1.63873	1.66418				0.0540577	0.85686	0				0.0540577	29.7022	30
			0.0550577	1.63931	1.66418				0.0550577	0.83729	0				0.0550577	29.7029	30
			0.0560577	1.63989	1.66418				0.0560577	0.81782	0				0.0560577	29.7035	30
			0.0570577	1.64047	1.66418				0.0570577	0.79843	0				0.0570577	29.7041	30
			0.0580577	1.64105	1.66418				0.0580577	0.77914	0				0.0580577	29.7048	30
			0.0590577	1.64163	1.66418				0.0590577	0.75995	0				0.0590577	29.7054	30
			0.0600577	1.6422	1.66418				0.0600577	0.74088	0				0.0600577	29.706	30
			0.0610577	1.64275	1.66418				0.0610577	0.72247	0				0.0610577	29.7066	30
			0.0620577	1.6433	1.66418				0.0620577	0.70416	0				0.0620577	29.7072	30
			0.0630577	1.64384	1.66418				0.0630577	0.68594	0				0.0630577	29.7078	30
			0.0640577	1.64438	1.66418				0.0640577	0.6678	0				0.0640577	29.7084	30
			0.0650577	1.64492	1.66418				0.0650577	0.64976	0				0.0650577	29.709	30
			0.0660577	1.64546	1.66418				0.0660577	0.6318	0				0.0660577	29.7096	30
			0.0670577	1.64599	1.66418				0.0670577	0.61392	0				0.0670577	29.7101	30
			0.0680577	1.64653	1.66418				0.0680577	0.59614	0				0.0680577	29.7107	30
			0.0690577	1.64705	1.66418				0.0690577	0.57862	0				0.0690577	29.7113	30
			0.0700577	1.64757	1.66418				0.0700577	0.56136	0				0.0700577	29.7118	30
			0.0710577	1.64806	1.66418				0.0710577	0.54464	0				0.0710577	29.7124	30
			0.0720577	1.64856	1.66418				0.0720577	0.52792	0				0.0720577	29.7129	30
			0.0730577	1.64906	1.66418				0.0730577	0.51119	0				0.0730577	29.7135	30
			0.0740577	1.64956	1.66418				0.0740577	0.49447	0				0.0740577	29.714	30
			0.0750577	1.65006	1.66418				0.0750577	0.47774	0				0.0750577	29.7145	30
			0.0760577	1.65056	1.66418				0.0760577	0.46102	0				0.0760577	29.7151	30
			0.0770577	1.65106	1.66418				0.0770577	0.44429	0				0.0770577	29.7156	30
			0.0780577	1.65156	1.66418				0.0780577	0.42756	0				0.0780577	29.7162	30
			0.0790577	1.65205	1.66418				0.0790577	0.41123	0				0.0790577	29.7167	30
			0.0800577	1.65253	1.66418				0.0800577	0.39531	0				0.0800577	29.7172	30
			0.0810577	1.65299	1.66418				0.0810577	0.37989	0				0.0810577	29.7177	30
			0.0820577	1.65345	1.66418				0.0820577	0.36447	0				0.0820577	29.7182	30
			0.0830577	1.65391	1.66418				0.0830577	0.34905	0				0.0830577	29.7187	30
			0.0840577	1.65437	1.66418				0.0840577	0.33363	0				0.0840577	29.7192	30
			0.0850577	1.65483	1.66418				0.0850577	0.3182	0				0.0850577	29.7197	30
			0.0860577	1.65529	1.66418				0.0860577	0.30278	0				0.0860577	29.7202	30
			0.0870577	1.65575	1.66418				0.0870577	0.28736	0				0.0870577	29.7207	30
			0.0880577	1.65621	1.66418				0.0880577	0.27193	0				0.0880577	29.7212	30
			0.0890577	1.65666	1.66418				0.0890577	0.25687	0				0.0890577	29.7217	30
			0.0900577	1.6571	1.66418				0.0900577	0.2422	0				0.0900577	29.7221	30
			0.0910577	1.65752	1.66418				0.0910577	0.22798	0				0.0910577	29.7226	30
			0.0920577	1.65794	1.66418				0.0920577	0.21376	0				0.0920577	29.723	30
			0.0930577	1.65837	1.66418				0.0930577	0.19953	0				0.0930577	29.7235	30
			0.0940577	1.65879	1.66418				0.0940577	0.18531	0				0.0940577	29.7239	30
			0.0950577	1.65921	1.66418				0.0950577	0.17109	0				0.0950577	29.7244	30
			0.0960577	1.65964	1.66418				0.0960577	0.15687	0				0.0960577	29.7248	30
			0.0968365	1.65997	1.66418				0.0968365	0.14579	0				0.0968365	29.7252	30
			0.0976154	1.60954	1.66418				0.0976154	1.86965	0				0.0976154	29.7183	30
			0.0986154	1.61015	1.66418				0.0986154	1.84866	0				0.0986154	29.719	30
			0.0996154	1.61092	1.66418				0.0996154	1.82226	0				0.0996154	29.7198	30
			0.100615	1.61166	1.66418				0.100615	1.79697	0				0.100615	29.7206	30
			0.101615	1.61239	1.66418				0.101615	1.772	0				0.101615	29.7215	30
			0.102615	1.61311	1.66418				0.102615	1.74713	0				0.102615	29.7223	30
			0.103615	1.61384	1.66418				0.103615	1.72235	0				0.103615	29.7231	30
			0.104615	1.61456	1.66418				0.104615	1.69766	0				0.104615	29.7239	30
			0.105615	1.61528	1.66418				0.105615	1.67307	0				0.105615	29.7247	30
			0.106615	1.61599	1.66418				0.106615	1.64857	0				0.106615	29.7254	30
			0.107615	1.61671	1.66418				0.107615	1.62416	0				0.107615	29.7262	30
			0.108615	1.61742	1.66418				0.108615	1.59988	0				0.108615	29.727	30
			0.109615	1.61811	1.66418				0.109615	1.57626	0				0.109615	29.7278	30
			0.110615	1.61879	1.66418				0.110615	1.55299	0				0.110615	29.7285	30
			0.111615	1.61946	1.66418				0.111615	1.52997	0				0.111615	29.7293	30
			0.112615	1.62013	1.66418				0.112615	1.50704	0				0.112615	29.73	30
			0.113615	1.6208	1.66418				0.113615	1.48419	0				0.113615	29.7307	30
			0.114615	1.62147	1.66418				0.114615	1.46142	0				0.114615	29.7315	30
			0.115615	1.62213	1.66418				0.115615	1.43875	0				0.115615	29.7322	30
			0.116615	1.62279	1.66418				0.116615	1.41616	0				0.116615	29.7329	30
			0.117615	1.62344	1.66418				0.117615	1.39384	0				0.117615	29.7336	30
			0.118615	1.62409	1.66418				0.118615	1.37177	0				0.118615	29.7343	30
			0.119615	1.62472	1.66418				0.119615	1.35025	0				0.119615	29.735	30
			0.120615	1.62534	1.66418				0.120615	1.32895	0				0.120615	29.7357	30
			0.121615	1.62596	1.66418				0.121615	1.3078	0				0.121615	29.7364	30
			0.122615	1.62657	1.66418				0.122615	1.28665	0				0.122615	29.7371	30
			0.123615	1.62719	1.66418				0.123615	1.2655	0				0.123615	29.7377	30
			0.124615	1.62781	1.66418				0.124615	1.24435	0				0.124615	29.7384	30
			0.125615	1.62843	1.66418				0.125615	1.22319	0				0.125615	29.7391	30
			0.126615	1.62905	1.66418				0.126615	1.20204	0				0.126615	29.7398	30
			0.127615	1.62966	1.66418				0.127615	1.18128	0				0.127615	29.7404	30
			0.128615	1.63025	1.66418				0.128615	1.16094	0				0.128615	29.7411	30
			0.129615	1.63083	1.66418				0.129615	1.14109	0				0.129615	29.7417	30
			0.130615	1.6314	1.66418				0.130615	1.12145	0				0.130615	29.7423	30
			0.131615	1.63197	1.66418				0.131615	1.10195	0				0.131615	29.743	30
			0.132615	1.63254	1.66418				0.132615	1.08245	0				0.132615	29.7436	30
			0.133615	1.63311	1.66418				0.133615	1.06294	0				0.133615	29.7442	30
			0.134615	1.63368	1.66418				0.134615	1.04344	0				0.134615	29.7448	30
			0.135615	1.63425	1.66418				0.135615	1.02394	0				0.135615	29.7455	30
			0.136615	1.63482	1.66418				0.136615	1.00443	0				0.136615	29.7461	30
			0.137615	1.63538	1.66418				0.137615	0.98529	0				0.137615	29.7467	30
			0.138615	1.63593	1.66418				0.138615	0.96653	0				0.138615	29.7473	30
			0.139615	1.63647	1.66418				0.139615	0.94823	0				0.139615	29.7479	30
			0.140615	1.63699	1.66418				0.140615	0.93012	0				0.140615	29.7484	30
			0.141615	1.63752	1.66418				0.141615	0.91214	0				0.141615	29.749	30
			0.142615	1.63804	1.66418				0.142615	0.89416	0				0.142615	29.7496	30
			0.143615	1.63857	1.66418				0.143615	0.87618	0				0.143615	29.7501	30
			0.144615	1.6391	1.66418				0.144615	0.85819	0				0.144615	29.7507	30
			0.145394	1.6395	1.66418				0.145394	0.84419	0				0.145394	29.7511	30
			0.146173	1.12574	1.16106				0.146173	1.76744	0				0.146173	29.6402	30
			0.147173	1.12623	1.16106				0.147173	1.74295	0				0.147173	29.641	30
			0.148173	1.12682	1.16106				0.148173	1.71329	0				0.148173	29.6419	30
			0.149173	1.1274	1.16106				0.149173	1.68471	0				0.149173	29.6428	30
			0.150173	1.12797	1.16106				0.150173	1.65648	0				0.150173	29.6437	30
			0.151173	1.12853	1.16106				0.151173	1.6286	0				0.151173	29.6446	30
			0.152173	1.12909	1.16106				0.152173	1.60081	0				0.152173	29.6455	30
			0.153173	1.12964	1.16106				0.153173	1.57311	0				0.153173	29.6463	30
			0.154173	1.1302	1.16106				0.154173	1.5455	0				0.154173	29.6472	30
			0.155173	1.13075	1.16106				0.155173	1.51798	0				0.155173	29.6481	30
			0.156173	1.1313	1.16106				0.156173	1.49055	0				0.156173	29.6489	30
			0.157173	1.13185	1.16106				0.157173	1.46324	0				0.157173	29.6498	30
			0.158173	1.13239	1.16106				0.158173	1.43659	0				0.158173	29.6506	30
			0.159173	1.13292	1.16106				0.159173	1.41028	0				0.159173	29.6515	30
			0.160173	1.13344	1.16106				0.160173	1.38426	0				0.160173	29.6523	30
			0.161173	1.13396	1.16106				0.161173	1.35856	0				0.161173	29.6531	30
			0.162173	1.13447	1.16106				0.162173	1.33293	0				0.162173	29.6539	30
			0.163173	1.13499	1.16106				0.163173	1.30739	0				0.163173	29.6547	30
			0.164173	1.1355	1.16106				0.164173	1.28193	0				0.164173	29.6555	30
			0.165173	1.13601	1.16106				0.165173	1.25656	0				0.165173	29.6563	30
			0.166173	1.13652	1.16106				0.166173	1.23144	0				0.166173	29.6571	30
			0.167173	1.13702	1.16106				0.167173	1.20657	0				0.167173	29.6579	30
			0.168173	1.13751	1.16106				0.168173	1.18224	0				0.168173	29.6586	30
			0.169173	1.13799	1.16106				0.169173	1.15814	0				0.169173	29.6594	30
			0.170173	1.13847	1.16106				0.170173	1.13422	0				0.170173	29.6602	30
			0.171173	1.13895	1.16106				0.171173	1.11052	0				0.171173	29.6609	30
			0.172173	1.13943	1.16106				0.172173	1.08681	0				0.172173	29.6616	30
			0.173173	1.13991	1.16106				0.173173	1.0631	0				0.173173	29.6624	30
			0.174173	1.14038	1.16106				0.174173	1.0394	0				0.174173	29.6631	30
			0.175173	1.14086	1.16106				0.175173	1.01569	0				0.175173	29.6639	30
			0.176173	1.14133	1.16106				0.176173	0.99236	0				0.176173	29.6646	30
			0.177173	1.14179	1.16106				0.177173	0.96943	0				0.177173	29.6653	30
			0.178173	1.14224	1.16106				0.178173	0.94699	0				0.178173	29.666	30
			0.179173	1.14269	1.16106				0.179173	0.92477	0				0.179173	29.6667	30
			0.180173	1.14314	1.16106				0.180173	0.90272	0				0.180173	29.6674	30
			0.181173	1.14358	1.16106				0.181173	0.88086	0				0.181173	29.6681	30
			0.182173	1.14402	1.16106				0.182173	0.859	0				0.182173	29.6687	30
			0.183173	1.14446	1.16106				0.183173	0.83714	0				0.183173	29.6694	30
			0.184173	1.1449	1.16106				0.184173	0.81528	0				0.184173	29.6701	30
			0.185173	1.14534	1.16106				0.185173	0.79342	0				0.185173	29.6708	30
			0.186173	1.14577	1.16106				0.186173	0.77191	0				0.186173	29.6715	30
			0.187173	1.1462	1.16106				0.187173	0.75077	0				0.187173	29.6721	30
			0.188173	1.14661	1.16106				0.188173	0.73008	0				0.188173	29.6728	30
			0.189173	1.14702	1.16106				0.189173	0.70959	0				0.189173	29.6734	30
			0.190173	1.14743	1.16106				0.190173	0.68926	0				0.190173	29.674	30
			0.191173	1.14784	1.16106				0.191173	0.6691	0				0.191173	29.6746	30
			0.192173	1.14825	1.16106				0.192173	0.64895	0				0.192173	29.6753	30
			0.193173	1.14865	1.16106				0.193173	0.62879	0				0.193173	29.6759	30
			0.193952	1.14897	1.16106				0.193952	0.61309	0				0.193952	29.6764	30
			0.194731	1.11936	1.16106				0.194731	2.10421	0				0.194731	29.6545	30
			0.195731	1.11989	1.16106				0.195731	2.07772	0				0.195731	29.6553	30
			0.196731	1.12051	1.16106				0.196731	2.0462	0				0.196731	29.6563	30
			0.197731	1.12111	1.16106				0.197731	2.01574	0				0.197731	29.6572	30
			0.198731	1.12171	1.16106				0.198731	1.98563	0				0.198731	29.6582	30
			0.199731	1.12229	1.16106				0.199731	1.95587	0				0.199731	29.6591	30
			0.200731	1.12288	1.16106				0.200731	1.92633	0				0.200731	29.66	30
			0.201731	1.12346	1.16106				0.201731	1.89694	0				0.201731	29.6609	30
			0.202731	1.12404	1.16106				0.202731	1.86763	0				0.202731	29.6619	30
			0.203731	1.12462	1.16106				0.203731	1.83842	0				0.203731	29.6628	30
			0.204731	1.12519	1.16106				0.204731	1.80928	0				0.204731	29.6637	30
			0.205731	1.12577	1.16106				0.205731	1.78027	0				0.205731	29.6646	30
			0.206731	1.12633	1.16106				0.206731	1.75189	0				0.206731	29.6655	30
			0.207731	1.12688	1.16106				0.207731	1.72385	0				0.207731	29.6663	30
			0.208731	1.12743	1.16106				0.208731	1.6961	0				0.208731	29.6672	30
			0.209731	1.12797	1.16106				0.209731	1.66865	0				0.209731	29.6681	30
			0.210731	1.12851	1.16106				0.210731	1.64142	0				0.210731	29.6689	30
			0.211731	1.12905	1.16106				0.211731	1.61432	0				0.211731	29.6698	30
			0.212731	1.12959	1.16106				0.212731	1.5873	0				0.212731	29.6706	30
			0.213731	1.13012	1.16106				0.213731	1.56036	0				0.213731	29.6714	30
			0.214731	1.13065	1.16106				0.214731	1.53367	0				0.214731	29.6722	30
			0.215731	1.13117	1.16106				0.215731	1.50722	0				0.215731	29.6731	30
			0.216731	1.13168	1.16106				0.216731	1.48129	0				0.216731	29.6739	30
			0.217731	1.13219	1.16106				0.217731	1.45558	0				0.217731	29.6747	30
			0.218731	1.1327	1.16106				0.218731	1.43007	0				0.218731	29.6755	30
			0.219731	1.1332	1.16106				0.219731	1.40476	0				0.219731	29.6762	30
			0.220731	1.1337	1.16106				0.220731	1.37957	0				0.220731	29.677	30
			0.221731	1.1342	1.16106				0.221731	1.35443	0				0.221731	29.6778	30
			0.222731	1.13469	1.16106				0.222731	1.32929	0				0.222731	29.6786	30
			0.223731	1.13519	1.16106				0.223731	1.30415	0				0.223731	29.6794	30
			0.224731	1.13568	1.16106				0.224731	1.27937	0				0.224731	29.6801	30
			0.225731	1.13617	1.16106				0.225731	1.25499	0				0.225731	29.6809	30
			0.226731	1.13664	1.16106				0.226731	1.23107	0				0.226731	29.6816	30
			0.227731	1.13711	1.16106				0.227731	1.20737	0				0.227731	29.6823	30
			0.228731	1.13758	1.16106				0.228731	1.18384	0				0.228731	29.6831	30
			0.229731	1.13804	1.16106				0.229731	1.16051	0				0.229731	29.6838	30
			0.230731	1.1385	1.16106				0.230731	1.13729	0				0.230731	29.6845	30
			0.231731	1.13896	1.16106				0.231731	1.11411	0				0.231731	29.6852	30
			0.232731	1.13942	1.16106				0.232731	1.09092	0				0.232731	29.6859	30
			0.233731	1.13988	1.16106				0.233731	1.06774	0				0.233731	29.6866	30
			0.234731	1.14033	1.16106				0.234731	1.0449	0				0.234731	29.6873	30
			0.235731	1.14078	1.16106				0.235731	1.02241	0				0.235731	29.688	30
			0.236731	1.14121	1.16106				0.236731	1.00036	0				0.236731	29.6887	30
			0.237731	1.14165	1.16106				0.237731	0.97851	0				0.237731	29.6894	30
			0.238731	1.14208	1.16106				0.238731	0.95682	0				0.238731	29.69	30
			0.239731	1.1425	1.16106				0.239731	0.9353	0				0.239731	29.6907	30
			0.240731	1.14293	1.16106				0.240731	0.91389	0				0.240731	29.6914	30
			0.241731	1.14335	1.16106				0.241731	0.89251	0				0.241731	29.692	30
			0.24251	1.14368	1.16106				0.24251	0.87587	0				0.24251	29.6925	30
			0.243288	1.11738	1.16106				0.243288	2.26875	0				0.243288	29.6675	30
			0.244288	1.11791	1.16106				0.244288	2.24141	0				0.244288	29.6684	30
			0.245288	1.11853	1.16106				0.245288	2.20936	0				0.245288	29.6694	30
			0.246288	1.11914	1.16106				0.246288	2.17833	0				0.246288	29.6703	30
			0.247288	1.11973	1.16106				0.247288	2.14763	0				0.247288	29.6713	30
			0.248288	1.12032	1.16106				0.248288	2.11727	0				0.248288	29.6722	30
			0.249288	1.12091	1.16106				0.249288	2.08713	0				0.249288	29.6731	30
			0.250288	1.12149	1.16106				0.250288	2.05717	0				0.250288	29.674	30
			0.251288	1.12206	1.16106				0.251288	2.02739	0				0.251288	29.6749	30
			0.252288	1.12264	1.16106				0.252288	1.99768	0				0.252288	29.6759	30
			0.253288	1.12322	1.16106				0.253288	1.96806	0				0.253288	29.6768	30
			0.254288	1.12379	1.16106				0.254288	1.93854	0				0.254288	29.6777	30
			0.255288	1.12435	1.16106				0.255288	1.90965	0				0.255288	29.6786	30
			0.256288	1.12491	1.16106				0.256288	1.88107	0				0.256288	29.6794	30
			0.257288	1.12546	1.16106				0.257288	1.85278	0				0.257288	29.6803	30
			0.258288	1.126	1.16106				0.258288	1.82478	0				0.258288	29.6811	30
			0.259288	1.12654	1.16106				0.259288	1.79699	0				0.259288	29.682	30
			0.260288	1.12708	1.16106				0.260288	1.76937	0				0.260288	29.6828	30
			0.261288	1.12761	1.16106				0.261288	1.7419	0				0.261288	29.6837	30
			0.262288	1.12814	1.16106				0.262288	1.71451	0				0.262288	29.6845	30
			0.263288	1.12867	1.16106				0.263288	1.68736	0				0.263288	29.6853	30
			0.264288	1.12919	1.16106				0.264288	1.66044	0				0.264288	29.6862	30
			0.265288	1.12971	1.16106				0.265288	1.63401	0				0.265288	29.687	30
			0.266288	1.13022	1.16106				0.266288	1.6078	0				0.266288	29.6878	30
			0.267288	1.13072	1.16106				0.267288	1.58178	0				0.267288	29.6885	30
			0.268288	1.13122	1.16106				0.268288	1.55596	0				0.268288	29.6893	30
			0.269288	1.13172	1.16106				0.269288	1.53027	0				0.269288	29.6901	30
			0.270288	1.13222	1.16106				0.270288	1.50465	0				0.270288	29.6909	30
			0.271288	1.13272	1.16106				0.271288	1.47912	0				0.271288	29.6917	30
			0.272288	1.13322	1.16106				0.272288	1.45358	0				0.272288	29.6925	30
			0.273288	1.13371	1.16106				0.273288	1.42838	0				0.273288	29.6932	30
			0.274288	1.13419	1.16106				0.274288	1.40356	0				0.274288	29.694	30
			0.275288	1.13466	1.16106				0.275288	1.37919	0				0.275288	29.6947	30
			0.276288	1.13513	1.16106				0.276288	1.35503	0				0.276288	29.6954	30
			0.277288	1.1356	1.16106				0.277288	1.33103	0				0.277288	29.6962	30
			0.278288	1.13606	1.16106				0.278288	1.30723	0				0.278288	29.6969	30
			0.279288	1.13652	1.16106				0.279288	1.28354	0				0.279288	29.6976	30
			0.280288	1.13698	1.16106				0.280288	1.25992	0				0.280288	29.6983	30
			0.281288	1.13744	1.16106				0.281288	1.23637	0				0.281288	29.699	30
			0.282288	1.1379	1.16106				0.282288	1.21282	0				0.282288	29.6997	30
			0.283288	1.13835	1.16106				0.283288	1.18959	0				0.283288	29.7004	30
			0.284288	1.1388	1.16106				0.284288	1.1667	0				0.284288	29.7011	30
			0.285288	1.13924	1.16106				0.285288	1.14423	0				0.285288	29.7018	30
			0.286288	1.13967	1.16106				0.286288	1.12195	0				0.286288	29.7025	30
			0.287288	1.1401	1.16106				0.287288	1.09983	0				0.287288	29.7032	30
			0.288288	1.14053	1.16106				0.288288	1.07788	0				0.288288	29.7038	30
			0.289288	1.14095	1.16106				0.289288	1.05603	0				0.289288	29.7045	30
			0.290288	1.14138	1.16106				0.290288	1.03425	0				0.290288	29.7051	30
			0.291067	1.14171	1.16106				0.291067	1.01734	0				0.291067	29.7056	30
			0.291846	1.11635	1.16106				0.291846	2.36349	0				0.291846	29.6872	30
			0.292846	1.11687	1.16106				0.292846	2.33612	0				0.292846	29.6881	30
			0.293846	1.11748	1.16106				0.293846	2.30428	0				0.293846	29.689	30
			0.294846	1.11807	1.16106				0.294846	2.27341	0				0.294846	29.69	30
			0.295846	1.11866	1.16106				0.295846	2.24287	0				0.295846	29.6909	30
			0.296846	1.11923	1.16106				0.296846	2.21265	0				0.296846	29.6918	30
			0.297846	1.11981	1.16106				0.297846	2.18266	0				0.297846	29.6927	30
			0.298846	1.12038	1.16106				0.298846	2.15283	0				0.298846	29.6936	30
			0.299846	1.12095	1.16106				0.299846	2.12317	0				0.299846	29.6945	30
			0.300846	1.12151	1.16106				0.300846	2.09366	0				0.300846	29.6954	30
			0.301846	1.12208	1.16106				0.301846	2.06424	0				0.301846	29.6963	30
			0.302846	1.12264	1.16106				0.302846	2.03493	0				0.302846	29.6972	30
			0.303846	1.12319	1.16106				0.303846	2.0062	0				0.303846	29.698	30
			0.304846	1.12373	1.16106				0.304846	1.97778	0				0.304846	29.6989	30
			0.305846	1.12427	1.16106				0.305846	1.94963	0				0.305846	29.6998	30
			0.306846	1.12481	1.16106				0.306846	1.92176	0				0.306846	29.7006	30
			0.307846	1.12534	1.16106				0.307846	1.8941	0				0.307846	29.7014	30
			0.308846	1.12587	1.16106				0.308846	1.8666	0				0.308846	29.7023	30
			0.309846	1.12639	1.16106				0.309846	1.83925	0				0.309846	29.7031	30
			0.310846	1.12691	1.16106				0.310846	1.81204	0				0.310846	29.7039	30
			0.311846	1.12743	1.16106				0.311846	1.78507	0				0.311846	29.7047	30
			0.312846	1.12794	1.16106				0.312846	1.75832	0				0.312846	29.7055	30
			0.313846	1.12845	1.16106				0.313846	1.73203	0				0.313846	29.7063	30
			0.314846	1.12895	1.16106				0.314846	1.70596	0				0.314846	29.7071	30
			0.315846	1.12944	1.16106				0.315846	1.68007	0				0.315846	29.7079	30
			0.316846	1.12994	1.16106				0.316846	1.65437	0				0.316846	29.7086	30
			0.317846	1.13043	1.16106				0.317846	1.6288	0				0.317846	29.7094	30
			0.318846	1.13092	1.16106				0.318846	1.6033	0				0.318846	29.7102	30
			0.319846	1.1314	1.16106				0.319846	1.57788	0				0.319846	29.7109	30
			0.320846	1.13189	1.16106				0.320846	1.55253	0				0.320846	29.7117	30
			0.321846	1.13237	1.16106				0.321846	1.52751	0				0.321846	29.7125	30
			0.322846	1.13284	1.16106				0.322846	1.50284	0				0.322846	29.7132	30
			0.323846	1.13331	1.16106				0.323846	1.4786	0				0.323846	29.7139	30
			0.324846	1.13377	1.16106				0.324846	1.45456	0				0.324846	29.7146	30
			0.325846	1.13423	1.16106				0.325846	1.43068	0				0.325846	29.7153	30
			0.326846	1.13468	1.16106				0.326846	1.40699	0				0.326846	29.716	30
			0.327846	1.13514	1.16106				0.327846	1.38341	0				0.327846	29.7168	30
			0.328846	1.13559	1.16106				0.328846	1.35989	0				0.328846	29.7175	30
			0.329846	1.13604	1.16106				0.329846	1.33646	0				0.329846	29.7182	30
			0.330846	1.13649	1.16106				0.330846	1.31308	0				0.330846	29.7189	30
			0.331846	1.13693	1.16106				0.331846	1.29001	0				0.331846	29.7196	30
			0.332846	1.13737	1.16106				0.332846	1.26726	0				0.332846	29.7202	30
			0.333846	1.1378	1.16106				0.333846	1.24491	0				0.333846	29.7209	30
			0.334846	1.13822	1.16106				0.334846	1.22274	0				0.334846	29.7216	30
			0.335846	1.13865	1.16106				0.335846	1.20073	0				0.335846	29.7222	30
			0.336846	1.13906	1.16106				0.336846	1.17888	0				0.336846	29.7229	30
			0.337846	1.13948	1.16106				0.337846	1.15713	0				0.337846	29.7235	30
			0.338846	1.1399	1.16106				0.338846	1.13545	0				0.338846	29.7242	30
			0.339625	1.14022	1.16106				0.339625	1.11862	0				0.339625	29.7247	30
			0.340404	1.11431	1.16106				0.340404	2.4527	0				0.340404	29.7251	30
			0.341404	1.11482	1.16106				0.341404	2.42587	0				0.341404	29.726	30
			0.342404	1.1154	1.16106				0.342404	2.39488	0				0.342404	29.7269	30
			0.343404	1.11597	1.16106				0.343404	2.36482	0				0.343404	29.7278	30
			0.344404	1.11653	1.16106				0.344404	2.33507	0				0.344404	29.7287	30
			0.345404	1.11709	1.16106				0.345404	2.30562	0				0.345404	29.7296	30
			0.346404	1.11764	1.16106				0.346404	2.27639	0				0.346404	29.7304	30
			0.347404	1.11819	1.16106				0.347404	2.24731	0				0.347404	29.7313	30
			0.348404	1.11874	1.16106				0.348404	2.21841	0				0.348404	29.7322	30
			0.349404	1.11928	1.16106				0.349404	2.18965	0				0.349404	29.733	30
			0.350404	1.11983	1.16106				0.350404	2.16099	0				0.350404	29.7339	30
			0.351404	1.12037	1.16106				0.351404	2.13248	0				0.351404	29.7347	30
			0.352404	1.1209	1.16106				0.352404	2.10451	0				0.352404	29.7356	30
			0.353404	1.12142	1.16106				0.353404	2.07683	0				0.353404	29.7364	30
			0.354404	1.12194	1.16106				0.354404	2.0494	0				0.354404	29.7372	30
			0.355404	1.12245	1.16106				0.355404	2.02225	0				0.355404	29.738	30
			0.356404	1.12296	1.16106				0.356404	1.99529	0				0.356404	29.7388	30
			0.357404	1.12347	1.16106				0.357404	1.96849	0				0.357404	29.7396	30
			0.358404	1.12397	1.16106				0.358404	1.94183	0				0.358404	29.7404	30
			0.359404	1.12448	1.16106				0.359404	1.91531	0				0.359404	29.7412	30
			0.360404	1.12497	1.16106				0.360404	1.88903	0				0.360404	29.742	30
			0.361404	1.12547	1.16106				0.361404	1.86299	0				0.361404	29.7428	30
			0.362404	1.12595	1.16106				0.362404	1.83739	0				0.362404	29.7435	30
			0.363404	1.12643	1.16106				0.363404	1.81199	0				0.363404	29.7443	30
			0.364404	1.12691	1.16106				0.364404	1.78676	0				0.364404	29.745	30
			0.365404	1.12738	1.16106				0.365404	1.76172	0				0.365404	29.7458	30
			0.366404	1.12786	1.16106				0.366404	1.7368	0				0.366404	29.7465	30
			0.367404	1.12833	1.16106				0.367404	1.71196	0				0.367404	29.7473	30
			0.368404	1.1288	1.16106				0.368404	1.68719	0				0.368404	29.748	30
			0.369404	1.12927	1.16106				0.369404	1.66249	0				0.369404	29.7487	30
			0.370404	1.12973	1.16106				0.370404	1.63812	0				0.370404	29.7495	30
			0.371404	1.13018	1.16106				0.371404	1.61411	0				0.371404	29.7502	30
			0.372404	1.13063	1.16106				0.372404	1.5905	0				0.372404	29.7509	30
			0.373404	1.13107	1.16106				0.373404	1.56708	0				0.373404	29.7516	30
			0.374404	1.13151	1.16106				0.374404	1.54382	0				0.374404	29.7523	30
			0.375404	1.13195	1.16106				0.375404	1.52073	0				0.375404	29.7529	30
			0.376404	1.13239	1.16106				0.376404	1.49775	0				0.376404	29.7536	30
			0.377404	1.13282	1.16106				0.377404	1.47484	0				0.377404	29.7543	30
			0.378404	1.13325	1.16106				0.378404	1.452	0				0.378404	29.755	30
			0.379404	1.13369	1.16106				0.379404	1.42922	0				0.379404	29.7556	30
			0.380404	1.13411	1.16106				0.380404	1.40675	0				0.380404	29.7563	30
			0.381404	1.13453	1.16106				0.381404	1.38461	0				0.381404	29.757	30
			0.382404	1.13494	1.16106				0.382404	1.36284	0				0.382404	29.7576	30
			0.383404	1.13535	1.16106				0.383404	1.34125	0				0.383404	29.7582	30
			0.384404	1.13576	1.16106				0.384404	1.31979	0				0.384404	29.7589	30
			0.385404	1.13616	1.16106				0.385404	1.2985	0				0.385404	29.7595	30
			0.386404	1.13656	1.16106				0.386404	1.27731	0				0.386404	29.7601	30
			0.387404	1.13697	1.16106				0.387404	1.25619	0				0.387404	29.7607	30
			0.388183	1.13728	1.16106				0.388183	1.23979	0				0.388183	29.7612	30
			0.388962	1.11764	1.16106				0.388962	2.36194	0				0.388962	29.7498	30
			0.389962	1.11811	1.16106				0.389962	2.33631	0				0.389962	29.7506	30
			0.390962	1.11865	1.16106				0.390962	2.30713	0				0.390962	29.7514	30
			0.391962	1.11918	1.16106				0.391962	2.2788	0				0.391962	29.7523	30
			0.392962	1.1197	1.16106				0.392962	2.25077	0				0.392962	29.7531	30
			0.393962	1.12021	1.16106				0.393962	2.22301	0				0.393962	29.7539	30
			0.394962	1.12072	1.16106				0.394962	2.19545	0				0.394962	29.7547	30
			0.395962	1.12123	1.16106				0.395962	2.16804	0				0.395962	29.7555	30
			0.396962	1.12173	1.16106				0.396962	2.14079	0				0.396962	29.7563	30
			0.397962	1.12224	1.16106				0.397962	2.11367	0				0.397962	29.7571	30
			0.398962	1.12274	1.16106				0.398962	2.08664	0				0.398962	29.7579	30
			0.399962	1.12323	1.16106				0.399962	2.05975	0				0.399962	29.7587	30
			0.400962	1.12372	1.16106				0.400962	2.03339	0				0.400962	29.7595	30
			0.401962	1.12421	1.16106				0.401962	2.00731	0				0.401962	29.7602	30
			0.402962	1.12469	1.16106				0.402962	1.98146	0				0.402962	29.761	30
			0.403962	1.12516	1.16106				0.403962	1.95586	0				0.403962	29.7617	30
			0.404962	1.12563	1.16106				0.404962	1.93045	0				0.404962	29.7624	30
			0.405962	1.1261	1.16106				0.405962	1.90518	0				0.405962	29.7632	30
			0.406962	1.12657	1.16106				0.406962	1.88004	0				0.406962	29.7639	30
			0.407962	1.12703	1.16106				0.407962	1.85503	0				0.407962	29.7646	30
			0.408962	1.12749	1.16106				0.408962	1.83024	0				0.408962	29.7654	30
			0.409962	1.12794	1.16106				0.409962	1.80566	0				0.409962	29.7661	30
			0.410962	1.12839	1.16106				0.410962	1.78152	0				0.410962	29.7668	30
			0.411962	1.12884	1.16106				0.411962	1.75758	0				0.411962	29.7675	30
			0.412962	1.12928	1.16106				0.412962	1.73379	0				0.412962	29.7682	30
			0.413962	1.12971	1.16106				0.413962	1.71019	0				0.413962	29.7688	30
			0.414962	1.13015	1.16106				0.414962	1.6867	0				0.414962	29.7695	30
			0.415962	1.13058	1.16106				0.415962	1.66328	0				0.415962	29.7702	30
			0.416962	1.13102	1.16106				0.416962	1.63994	0				0.416962	29.7709	30
			0.417962	1.13145	1.16106				0.417962	1.61666	0				0.417962	29.7716	30
			0.418962	1.13188	1.16106				0.418962	1.59367	0				0.418962	29.7722	30
			0.419962	1.1323	1.16106				0.419962	1.571	0				0.419962	29.7729	30
			0.420962	1.13271	1.16106				0.420962	1.54875	0				0.420962	29.7735	30
			0.421962	1.13312	1.16106				0.421962	1.52667	0				0.421962	29.7742	30
			0.422962	1.13353	1.16106				0.422962	1.50473	0				0.422962	29.7748	30
			0.423962	1.13393	1.16106				0.423962	1.48296	0				0.423962	29.7754	30
			0.424962	1.13433	1.16106				0.424962	1.4613	0				0.424962	29.7761	30
			0.425962	1.13473	1.16106				0.425962	1.43971	0				0.425962	29.7767	30
			0.426962	1.13513	1.16106				0.426962	1.41818	0				0.426962	29.7773	30
			0.427962	1.13553	1.16106				0.427962	1.39672	0				0.427962	29.7779	30
			0.428962	1.13592	1.16106				0.428962	1.37552	0				0.428962	29.7785	30
			0.429962	1.13631	1.16106				0.429962	1.35462	0				0.429962	29.7791	30
			0.430962	1.13669	1.16106				0.430962	1.33409	0				0.430962	29.7797	30
			0.431962	1.13707	1.16106				0.431962	1.31373	0				0.431962	29.7803	30
			0.432962	1.13744	1.16106				0.432962	1.2935	0				0.432962	29.7809	30
			0.433962	1.13782	1.16106				0.433962	1.27343	0				0.433962	29.7815	30
			0.434962	1.13819	1.16106				0.434962	1.25345	0				0.434962	29.782	30
			0.435962	1.13856	1.16106				0.435962	1.23353	0				0.435962	29.7826	30
			0.43674	1.13884	1.16106				0.43674	1.21807	0				0.43674	29.783	30
			0.437519	1.12044	1.16106				0.437519	2.25934	0				0.437519	29.7744	30
			0.438519	1.12088	1.16106				0.438519	2.23531	0				0.438519	29.7751	30
			0.439519	1.12138	1.16106				0.439519	2.20803	0				0.439519	29.7759	30
			0.440519	1.12186	1.16106				0.440519	2.18156	0				0.440519	29.7766	30
			0.441519	1.12234	1.16106				0.441519	2.15537	0				0.441519	29.7774	30
			0.442519	1.12282	1.16106				0.442519	2.12945	0				0.442519	29.7781	30
			0.443519	1.12329	1.16106				0.443519	2.1037	0				0.443519	29.7789	30
			0.444519	1.12376	1.16106				0.444519	2.0781	0				0.444519	29.7796	30
			0.445519	1.12422	1.16106				0.445519	2.05265	0				0.445519	29.7803	30
			0.446519	1.12468	1.16106				0.446519	2.02732	0				0.446519	29.7811	30
			0.447519	1.12515	1.16106				0.447519	2.00208	0				0.447519	29.7818	30
			0.448519	1.12561	1.16106				0.448519	1.97696	0				0.448519	29.7825	30
			0.449519	1.12606	1.16106				0.449519	1.95232	0				0.449519	29.7832	30
			0.450519	1.1265	1.16106				0.450519	1.92795	0				0.450519	29.7839	30
			0.451519	1.12695	1.16106				0.451519	1.9038	0				0.451519	29.7846	30
			0.452519	1.12738	1.16106				0.452519	1.87989	0				0.452519	29.7853	30
			0.453519	1.12782	1.16106				0.453519	1.85615	0				0.453519	29.786	30
			0.454519	1.12825	1.16106				0.454519	1.83254	0				0.454519	29.7867	30
			0.455519	1.12868	1.16106				0.455519	1.80907	0				0.455519	29.7873	30
			0.456519	1.12911	1.16106				0.456519	1.78571	0				0.456519	29.788	30
			0.457519	1.12953	1.16106				0.457519	1.76255	0				0.457519	29.7887	30
			0.458519	1.12995	1.16106				0.458519	1.73959	0				0.458519	29.7893	30
			0.459519	1.13037	1.16106				0.459519	1.71701	0				0.459519	29.79	30
			0.460519	1.13078	1.16106				0.460519	1.69463	0				0.460519	29.7906	30
			0.461519	1.13118	1.16106				0.461519	1.67241	0				0.461519	29.7913	30
			0.462519	1.13159	1.16106				0.462519	1.65036	0				0.462519	29.7919	30
			0.463519	1.13199	1.16106				0.463519	1.62842	0				0.463519	29.7925	30
			0.464519	1.13239	1.16106				0.464519	1.60655	0				0.464519	29.7931	30
			0.465519	1.13279	1.16106				0.465519	1.58475	0				0.465519	29.7938	30
			0.466519	1.13319	1.16106				0.466519	1.56301	0				0.466519	29.7944	30
			0.467519	1.13358	1.16106				0.467519	1.54155	0				0.467519	29.795	30
			0.468519	1.13397	1.16106				0.468519	1.52037	0				0.468519	29.7956	30
			0.469519	1.13435	1.16106				0.469519	1.49955	0				0.469519	29.7962	30
			0.470519	1.13473	1.16106				0.470519	1.47891	0				0.470519	29.7968	30
			0.471519	1.1351	1.16106				0.471519	1.45842	0				0.471519	29.7974	30
			0.472519	1.13547	1.16106				0.472519	1.43809	0				0.472519	29.798	30
			0.473519	1.13584	1.16106				0.473519	1.41785	0				0.473519	29.7985	30
			0.474519	1.13621	1.16106				0.474519	1.39768	0				0.474519	29.7991	30
			0.475519	1.13658	1.16106				0.475519	1.37758	0				0.475519	29.7997	30
			0.476519	1.13695	1.16106				0.476519	1.35753	0				0.476519	29.8002	30
			0.477519	1.13731	1.16106				0.477519	1.33773	0				0.477519	29.8008	30
			0.478519	1.13767	1.16106				0.478519	1.3182	0				0.478519	29.8014	30
			0.479519	1.13802	1.16106				0.479519	1.299	0				0.479519	29.8019	30
			0.480519	1.13837	1.16106				0.480519	1.27997	0				0.480519	29.8024	30
			0.481519	1.13872	1.16106				0.481519	1.26107	0				0.481519	29.803	30
			0.482519	1.13906	1.16106				0.482519	1.24232	0				0.482519	29.8035	30
			0.483519	1.1394	1.16106				0.483519	1.22366	0				0.483519	29.804	30
			0.484519	1.13974	1.16106				0.484519	1.20505	0				0.484519	29.8046	30
			0.485298	1.14001	1.16106				0.485298	1.19061	0				0.485298	29.805	30
			0.486077	1.12174	1.16106				0.486077	2.18021	0				0.486077	29.8088	30
			0.487077	1.12215	1.16106				0.487077	2.15792	0				0.487077	29.8095	30
			0.488077	1.1226	1.16106				0.488077	2.13273	0				0.488077	29.8102	30
			0.489077	1.12305	1.16106				0.489077	2.10826	0				0.489077	29.8109	30
			0.490077	1.12349	1.16106				0.490077	2.08404	0				0.490077	29.8116	30
			0.491077	1.12392	1.16106				0.491077	2.06008	0				0.491077	29.8123	30
			0.492077	1.12435	1.16106				0.492077	2.0363	0				0.492077	29.8129	30
			0.493077	1.12478	1.16106				0.493077	2.01264	0				0.493077	29.8136	30
			0.494077	1.12521	1.16106				0.494077	1.98912	0				0.494077	29.8143	30
			0.495077	1.12563	1.16106				0.495077	1.96572	0				0.495077	29.8149	30
			0.496077	1.12606	1.16106				0.496077	1.9424	0				0.496077	29.8156	30
			0.497077	1.12648	1.16106				0.497077	1.91919	0				0.497077	29.8163	30
			0.498077	1.12689	1.16106				0.498077	1.89642	0				0.498077	29.8169	30
			0.499077	1.1273	1.16106				0.499077	1.87388	0				0.499077	29.8176	30
			0.500077	1.12771	1.16106				0.500077	1.85155	0				0.500077	29.8182	30
			0.501077	1.12811	1.16106				0.501077	1.82946	0				0.501077	29.8188	30
			0.502077	1.12851	1.16106				0.502077	1.80752	0				0.502077	29.8195	30
			0.503077	1.1289	1.16106				0.503077	1.7857	0				0.503077	29.8201	30
			0.504077	1.1293	1.16106				0.504077	1.76401	0				0.504077	29.8207	30
			0.505077	1.12969	1.16106				0.505077	1.74243	0				0.505077	29.8213	30
			0.506077	1.13008	1.16106				0.506077	1.72103	0				0.506077	29.8219	30
			0.507077	1.13046	1.16106				0.507077	1.6998	0				0.507077	29.8225	30
			0.508077	1.13084	1.16106				0.508077	1.67894	0				0.508077	29.8231	30
			0.509077	1.13122	1.16106				0.509077	1.65824	0				0.509077	29.8237	30
			0.510077	1.13159	1.16106				0.510077	1.63769	0				0.510077	29.8243	30
			0.511077	1.13196	1.16106				0.511077	1.61732	0				0.511077	29.8249	30
			0.512077	1.13233	1.16106				0.512077	1.59704	0				0.512077	29.8254	30
			0.513077	1.1327	1.16106				0.513077	1.57683	0				0.513077	29.826	30
			0.514077	1.13306	1.16106				0.514077	1.55669	0				0.514077	29.8266	30
			0.515077	1.13343	1.16106				0.515077	1.53661	0				0.515077	29.8271	30
			0.516077	1.13379	1.16106				0.516077	1.51677	0				0.516077	29.8277	30
			0.517077	1.13414	1.16106				0.517077	1.4972	0				0.517077	29.8283	30
			0.518077	1.13449	1.16106				0.518077	1.47796	0				0.518077	29.8288	30
			0.519077	1.13484	1.16106				0.519077	1.45887	0				0.519077	29.8293	30
			0.520077	1.13518	1.16106				0.520077	1.43992	0				0.520077	29.8299	30
			0.521077	1.13552	1.16106				0.521077	1.42112	0				0.521077	29.8304	30
			0.522077	1.13586	1.16106				0.522077	1.40243	0				0.522077	29.8309	30
			0.523077	1.1362	1.16106				0.523077	1.38379	0				0.523077	29.8315	30
			0.524077	1.13654	1.16106				0.524077	1.36521	0				0.524077	29.832	30
			0.525077	1.13687	1.16106				0.525077	1.34669	0				0.525077	29.8325	30
			0.526077	1.13721	1.16106				0.526077	1.3284	0				0.526077	29.833	30
			0.527077	1.13753	1.16106				0.527077	1.31035	0				0.527077	29.8335	30
			0.528077	1.13786	1.16106				0.528077	1.2926	0				0.528077	29.834	30
			0.529077	1.13818	1.16106				0.529077	1.275	0				0.529077	29.8345	30
			0.530077	1.13849	1.16106				0.530077	1.25752	0				0.530077	29.835	30
			0.531077	1.13881	1.16106				0.531077	1.24019	0				0.531077	29.8355	30
			0.532077	1.13912	1.16106				0.532077	1.22294	0				0.532077	29.836	30
			0.533077	1.13943	1.16106				0.533077	1.20575	0				0.533077	29.8365	30
			0.533856	1.13967	1.16106				0.533856	1.19241	0				0.533856	29.8368	30
			0.534635	1.12502	1.16106				0.534635	2.02996	0				0.534635	29.8408	30
			0.535635	1.12538	1.16106				0.535635	2.0097	0				0.535635	29.8413	30
			0.536635	1.12579	1.16106				0.536635	1.987	0				0.536635	29.842	30
			0.537635	1.12618	1.16106				0.537635	1.96493	0				0.537635	29.8426	30
			0.538635	1.12657	1.16106				0.538635	1.94308	0				0.538635	29.8432	30
			0.539635	1.12696	1.16106				0.539635	1.92145	0				0.539635	29.8438	30
			0.540635	1.12734	1.16106				0.540635	1.89999	0				0.540635	29.8444	30
			0.541635	1.12773	1.16106				0.541635	1.87865	0				0.541635	29.845	30
			0.542635	1.12811	1.16106				0.542635	1.85743	0				0.542635	29.8456	30
			0.543635	1.12848	1.16106				0.543635	1.83631	0				0.543635	29.8462	30
			0.544635	1.12886	1.16106				0.544635	1.81528	0				0.544635	29.8468	30
			0.545635	1.12923	1.16106				0.545635	1.79433	0				0.545635	29.8474	30
			0.546635	1.1296	1.16106				0.546635	1.77379	0				0.546635	29.848	30
			0.547635	1.12997	1.16106				0.547635	1.75345	0				0.547635	29.8485	30
			0.548635	1.13033	1.16106				0.548635	1.7333	0				0.548635	29.8491	30
			0.549635	1.13068	1.16106				0.549635	1.71336	0				0.549635	29.8497	30
			0.550635	1.13104	1.16106				0.550635	1.69356	0				0.550635	29.8502	30
			0.551635	1.13139	1.16106				0.551635	1.67388	0				0.551635	29.8508	30
			0.552635	1.13174	1.16106				0.552635	1.65431	0				0.552635	29.8513	30
			0.553635	1.13209	1.16106				0.553635	1.63484	0				0.553635	29.8518	30
			0.554635	1.13243	1.16106				0.554635	1.61552	0				0.554635	29.8524	30
			0.555635	1.13278	1.16106				0.555635	1.59636	0				0.555635	29.8529	30
			0.556635	1.13311	1.16106				0.556635	1.57752	0				0.556635	29.8534	30
			0.557635	1.13345	1.16106				0.557635	1.55884	0				0.557635	29.854	30
			0.558635	1.13378	1.16106				0.558635	1.54029	0				0.558635	29.8545	30
			0.559635	1.13411	1.16106				0.559635	1.5219	0				0.559635	29.855	30
			0.560635	1.13444	1.16106				0.560635	1.5036	0				0.560635	29.8555	30
			0.561635	1.13476	1.16106				0.561635	1.48537	0				0.561635	29.856	30
			0.562635	1.13509	1.16106				0.562635	1.46721	0				0.562635	29.8565	30
			0.563635	1.13541	1.16106				0.563635	1.4491	0				0.563635	29.857	30
			0.564635	1.13573	1.16106				0.564635	1.4312	0				0.564635	29.8575	30
			0.565635	1.13605	1.16106				0.565635	1.41353	0				0.565635	29.858	30
			0.566635	1.13636	1.16106				0.566635	1.39616	0				0.566635	29.8585	30
			0.567635	1.13667	1.16106				0.567635	1.37893	0				0.567635	29.859	30
			0.568635	1.13697	1.16106				0.568635	1.36182	0				0.568635	29.8594	30
			0.569635	1.13727	1.16106				0.569635	1.34485	0				0.569635	29.8599	30
			0.570635	1.13758	1.16106				0.570635	1.32798	0				0.570635	29.8604	30
			0.571635	1.13788	1.16106				0.571635	1.31117	0				0.571635	29.8608	30
			0.572635	1.13818	1.16106				0.572635	1.29442	0				0.572635	29.8613	30
			0.573635	1.13847	1.16106				0.573635	1.27772	0				0.573635	29.8618	30
			0.574635	1.13877	1.16106				0.574635	1.26121	0				0.574635	29.8622	30
			0.575635	1.13906	1.16106				0.575635	1.24491	0				0.575635	29.8627	30
			0.576635	1.13935	1.16106				0.576635	1.22889	0				0.576635	29.8631	30
			0.577635	1.13963	1.16106				0.577635	1.21299	0				0.577635	29.8636	30
			0.578635	1.13991	1.16106				0.578635	1.19721	0				0.578635	29.864	30
			0.579635	1.14019	1.16106				0.579635	1.18157	0				0.579635	29.8644	30
			0.580635	1.14047	1.16106				0.580635	1.166	0				0.580635	29.8649	30
			0.581635	1.14075	1.16106				0.581635	1.1505	0				0.581635	29.8653	30
			0.582413	1.14096	1.16106				0.582413	1.13846	0				0.582413	29.8656	30
			0.583192	1.12851	1.16106				0.583192	1.86275	0				0.583192	29.8689	30
			0.584192	1.12882	1.16106				0.584192	1.84467	0				0.584192	29.8694	30
			0.585192	1.12918	1.16106				0.585192	1.82455	0				0.585192	29.8699	30
			0.586192	1.12952	1.16106				0.586192	1.80495	0				0.586192	29.8705	30
			0.587192	1.12987	1.16106				0.587192	1.78554	0				0.587192	29.871	30
			0.588192	1.1302	1.16106				0.588192	1.76634	0				0.588192	29.8715	30
			0.589192	1.13054	1.16106				0.589192	1.74728	0				0.589192	29.8721	30
			0.590192	1.13087	1.16106				0.590192	1.72832	0				0.590192	29.8726	30
			0.591192	1.13121	1.16106				0.591192	1.70949	0				0.591192	29.8731	30
			0.592192	1.13154	1.16106				0.592192	1.69075	0				0.592192	29.8736	30
			0.593192	1.13187	1.16106				0.593192	1.67208	0				0.593192	29.8741	30
			0.594192	1.13219	1.16106				0.594192	1.65349	0				0.594192	29.8746	30
			0.595192	1.13252	1.16106				0.595192	1.63524	0				0.595192	29.8751	30
			0.596192	1.13283	1.16106				0.596192	1.61717	0				0.596192	29.8756	30
			0.597192	1.13315	1.16106				0.597192	1.59927	0				0.597192	29.8761	30
			0.598192	1.13346	1.16106				0.598192	1.58156	0				0.598192	29.8766	30
			0.599192	1.13377	1.16106				0.599192	1.56398	0				0.599192	29.8771	30
			0.600192	1.13408	1.16106				0.600192	1.5465	0				0.600192	29.8776	30
			0.601192	1.13439	1.16106				0.601192	1.52913	0				0.601192	29.8781	30
			0.602192	1.13469	1.16106				0.602192	1.51185	0				0.602192	29.8785	30
			0.603192	1.13499	1.16106				0.603192	1.4947	0				0.603192	29.879	30
			0.604192	1.13529	1.16106				0.604192	1.47768	0				0.604192	29.8795	30
			0.605192	1.13559	1.16106				0.605192	1.46094	0				0.605192	29.8799	30
			0.606192	1.13588	1.16106				0.606192	1.44434	0				0.606192	29.8804	30
			0.607192	1.13617	1.16106				0.607192	1.42787	0				0.607192	29.8808	30
			0.608192	1.13646	1.16106				0.608192	1.41153	0				0.608192	29.8813	30
			0.609192	1.13674	1.16106				0.609192	1.39528	0				0.609192	29.8817	30
			0.610192	1.13703	1.16106				0.610192	1.37909	0				0.610192	29.8822	30
			0.611192	1.13731	1.16106				0.611192	1.36297	0				0.611192	29.8826	30
			0.612192	1.13759	1.16106				0.612192	1.34691	0				0.612192	29.883	30
			0.613192	1.13787	1.16106				0.613192	1.33102	0				0.613192	29.8835	30
			0.614192	1.13815	1.16106				0.614192	1.31532	0				0.614192	29.8839	30
			0.615192	1.13842	1.16106				0.615192	1.29988	0				0.615192	29.8843	30
			0.616192	1.13869	1.16106				0.616192	1.28458	0				0.616192	29.8847	30
			0.617192	1.13896	1.16106				0.617192	1.26938	0				0.617192	29.8852	30
			0.618192	1.13922	1.16106				0.618192	1.25431	0				0.618192	29.8856	30
			0.619192	1.13949	1.16106				0.619192	1.23932	0				0.619192	29.886	30
			0.620192	1.13975	1.16106				0.620192	1.22439	0				0.620192	29.8864	30
			0.621192	1.14001	1.16106				0.621192	1.20952	0				0.621192	29.8868	30
			0.622192	1.14027	1.16106				0.622192	1.1947	0				0.622192	29.8872	30
			0.623192	1.14053	1.16106				0.623192	1.18005	0				0.623192	29.8876	30
			0.624192	1.14079	1.16106				0.624192	1.16557	0				0.624192	29.888	30
			0.625192	1.14104	1.16106				0.625192	1.15133	0				0.625192	29.8884	30
			0.626192	1.14128	1.16106				0.626192	1.13721	0				0.626192	29.8888	30
			0.627192	1.14153	1.16106				0.627192	1.12319	0				0.627192	29.8891	30
			0.628192	1.14178	1.16106				0.628192	1.10929	0				0.628192	29.8895	30
			0.629192	1.14202	1.16106				0.629192	1.09547	0				0.629192	29.8899	30
			0.630192	1.14226	1.16106				0.630192	1.08169	0				0.630192	29.8903	30
			0.630971	1.14245	1.16106				0.630971	1.07101	0				0.630971	29.8906	30
			0.63175	1.13209	1.16106				0.63175	1.68522	0				0.63175	29.8954	30
			0.63275	1.13237	1.16106				0.63275	1.66936	0				0.63275	29.8958	30
			0.63375	1.13267	1.16106				0.63375	1.65183	0				0.63375	29.8963	30
			0.63475	1.13297	1.16106				0.63475	1.63471	0				0.63475	29.8967	30
			0.63575	1.13326	1.16106				0.63575	1.61775	0				0.63575	29.8972	30
			0.63675	1.13355	1.16106				0.63675	1.60098	0				0.63675	29.8976	30
			0.63775	1.13384	1.16106				0.63775	1.58434	0				0.63775	29.8981	30
			0.63875	1.13413	1.16106				0.63875	1.56779	0				0.63875	29.8986	30
			0.63975	1.13442	1.16106				0.63975	1.55134	0				0.63975	29.899	30
			0.64075	1.1347	1.16106				0.64075	1.53498	0				0.64075	29.8994	30
			0.64175	1.13498	1.16106				0.64175	1.51868	0				0.64175	29.8999	30
			0.64275	1.13526	1.16106				0.64275	1.50246	0				0.64275	29.9003	30
			0.64375	1.13554	1.16106				0.64375	1.48652	0				0.64375	29.9007	30
			0.64475	1.13581	1.16106				0.64475	1.47074	0				0.64475	29.9012	30
			0.64575	1.13609	1.16106				0.64575	1.4551	0				0.64575	29.9016	30
			0.64675	1.13635	1.16106				0.64675	1.43963	0				0.64675	29.902	30
			0.64775	1.13662	1.16106				0.64775	1.42428	0				0.64775	29.9024	30
			0.64875	1.13688	1.16106				0.64875	1.40901	0				0.64875	29.9028	30
			0.64975	1.13715	1.16106				0.64975	1.39384	0				0.64975	29.9032	30
			0.65075	1.13741	1.16106				0.65075	1.37875	0				0.65075	29.9036	30
			0.65175	1.13767	1.16106				0.65175	1.36378	0				0.65175	29.9041	30
			0.65275	1.13793	1.16106				0.65275	1.34892	0				0.65275	29.9045	30
			0.65375	1.13818	1.16106				0.65375	1.33429	0				0.65375	29.9048	30
			0.65475	1.13843	1.16106				0.65475	1.31979	0				0.65475	29.9052	30
			0.65575	1.13868	1.16106				0.65575	1.30539	0				0.65575	29.9056	30
			0.65675	1.13893	1.16106				0.65675	1.29112	0				0.65675	29.906	30
			0.65775	1.13917	1.16106				0.65775	1.27693	0				0.65775	29.9064	30
			0.65875	1.13942	1.16106				0.65875	1.2628	0				0.65875	29.9068	30
			0.65975	1.13966	1.16106				0.65975	1.24872	0				0.65975	29.9071	30
			0.66075	1.13991	1.16106				0.66075	1.2347	0				0.66075	29.9075	30
			0.66175	1.14015	1.16106				0.66175	1.22083	0				0.66175	29.9079	30
			0.66275	1.14038	1.16106				0.66275	1.20712	0				0.66275	29.9083	30
			0.66375	1.14062	1.16106				0.66375	1.19363	0				0.66375	29.9086	30
			0.66475	1.14085	1.16106				0.66475	1.18026	0				0.66475	29.909	30
			0.66575	1.14108	1.16106				0.66575	1.16697	0				0.66575	29.9093	30
			0.66675	1.14131	1.16106				0.66675	1.15381	0				0.66675	29.9097	30
			0.66775	1.14153	1.16106				0.66775	1.14072	0				0.66775	29.91	30
			0.66875	1.14176	1.16106				0.66875	1.12768	0				0.66875	29.9104	30
			0.66975	1.14198	1.16106				0.66975	1.1147	0				0.66975	29.9107	30
			0.67075	1.14221	1.16106				0.67075	1.10176	0				0.67075	29.9111	30
			0.67175	1.14243	1.16106				0.67175	1.08897	0				0.67175	29.9114	30
			0.67275	1.14265	1.16106				0.67275	1.07633	0				0.67275	29.9118	30
			0.67375	1.14286	1.16106				0.67375	1.06388	0				0.67375	29.9121	30
			0.67475	1.14308	1.16106				0.67475	1.05154	0				0.67475	29.9124	30
			0.67575	1.14329	1.16106				0.67575	1.03929	0				0.67575	29.9127	30
			0.67675	1.1435	1.16106				0.67675	1.02715	0				0.67675	29.9131	30
			0.67775	1.14371	1.16106				0.67775	1.01507	0				0.67775	29.9134	30
			0.67875	1.14391	1.16106				0.67875	1.00304	0				0.67875	29.9137	30
			0.679529	1.14407	1.16106				0.679529	0.99372	0				0.679529	29.914	30
			0.680308	1.13595	1.16106				0.680308	1.493	0				0.680308	29.9186	30
			0.681308	1.13618	1.16106				0.681308	1.47933	0				0.681308	29.919	30
			0.682308	1.13644	1.16106				0.682308	1.46432	0				0.682308	29.9194	30
			0.683308	1.13669	1.16106				0.683308	1.44963	0				0.683308	29.9198	30
			0.684308	1.13694	1.16106				0.684308	1.43508	0				0.684308	29.9201	30
			0.685308	1.13718	1.16106				0.685308	1.42069	0				0.685308	29.9205	30
			0.686308	1.13743	1.16106				0.686308	1.40641	0				0.686308	29.9209	30
			0.687308	1.13767	1.16106				0.687308	1.39222	0				0.687308	29.9213	30
			0.688308	1.13791	1.16106				0.688308	1.37811	0				0.688308	29.9216	30
			0.689308	1.13815	1.16106				0.689308	1.36408	0				0.689308	29.922	30
			0.690308	1.13839	1.16106				0.690308	1.3501	0				0.690308	29.9224	30
			0.691308	1.13863	1.16106				0.691308	1.33619	0				0.691308	29.9228	30
			0.692308	1.13886	1.16106				0.692308	1.32252	0				0.692308	29.9231	30
			0.693308	1.13909	1.16106				0.693308	1.30899	0				0.693308	29.9235	30
			0.694308	1.13932	1.16106				0.694308	1.29557	0				0.694308	29.9238	30
			0.695308	1.13955	1.16106				0.695308	1.28229	0				0.695308	29.9242	30
			0.696308	1.13977	1.16106				0.696308	1.26912	0				0.696308	29.9245	30
			0.697308	1.13999	1.16106				0.697308	1.25602	0				0.697308	29.9249	30
			0.698308	1.14022	1.16106				0.698308	1.24301	0				0.698308	29.9252	30
			0.699308	1.14044	1.16106				0.699308	1.23007	0				0.699308	29.9256	30
			0.700308	1.14066	1.16106				0.700308	1.21722	0				0.700308	29.9259	30
			0.701308	1.14087	1.16106				0.701308	1.20447	0				0.701308	29.9262	30
			0.702308	1.14109	1.16106				0.702308	1.19192	0				0.702308	29.9266	30
			0.703308	1.1413	1.16106				0.703308	1.17948	0				0.703308	29.9269	30
			0.704308	1.14151	1.16106				0.704308	1.16712	0				0.704308	29.9272	30
			0.705308	1.14172	1.16106				0.705308	1.15487	0				0.705308	29.9276	30
			0.706308	1.14193	1.16106				0.706308	1.1427	0				0.706308	29.9279	30
			0.707308	1.14213	1.16106				0.707308	1.13058	0				0.707308	29.9282	30
			0.708308	1.14234	1.16106				0.708308	1.11851	0				0.708308	29.9285	30
			0.709308	1.14254	1.16106				0.709308	1.10648	0				0.709308	29.9288	30
			0.710308	1.14274	1.16106				0.710308	1.09459	0				0.710308	29.9291	30
			0.711308	1.14294	1.16106				0.711308	1.08283	0				0.711308	29.9294	30
			0.712308	1.14314	1.16106				0.712308	1.07125	0				0.712308	29.9297	30
			0.713308	1.14334	1.16106				0.713308	1.05977	0				0.713308	29.9301	30
			0.714308	1.14353	1.16106				0.714308	1.04837	0				0.714308	29.9304	30
			0.715308	1.14372	1.16106				0.715308	1.03707	0				0.715308	29.9306	30
			0.716308	1.14391	1.16106				0.716308	1.02584	0				0.716308	29.9309	30
			0.717308	1.1441	1.16106				0.717308	1.01465	0				0.717308	29.9312	30
			0.718308	1.14429	1.16106				0.718308	1.00352	0				0.718308	29.9315	30
			0.719308	1.14448	1.16106				0.719308	0.99243	0				0.719308	29.9318	30
			0.720308	1.14467	1.16106				0.720308	0.98145	0				0.720308	29.9321	30
			0.721308	1.14485	1.16106				0.721308	0.9706	0				0.721308	29.9324	30
			0.722308	1.14504	1.16106				0.722308	0.95992	0				0.722308	29.9327	30
			0.723308	1.14522	1.16106				0.723308	0.94933	0				0.723308	29.933	30
			0.724308	1.14539	1.16106				0.724308	0.93881	0				0.724308	29.9332	30
			0.725308	1.14557	1.16106				0.725308	0.92839	0				0.725308	29.9335	30
			0.726308	1.14575	1.16106				0.726308	0.91803	0				0.726308	29.9338	30
			0.727308	1.14592	1.16106				0.727308	0.90771	0				0.727308	29.934	30
			0.728087	1.14606	1.16106				0.728087	0.89971	0				0.728087	29.9342	30
			0.728865	1.1394	1.16106				0.728865	1.31098	0				0.728865	29.9383	30
			0.729865	1.13959	1.16106				0.729865	1.29936	0				0.729865	29.9386	30
			0.730865	1.13981	1.16106				0.730865	1.28668	0				0.730865	29.9389	30
			0.731865	1.14002	1.16106				0.731865	1.27426	0				0.731865	29.9393	30
			0.732865	1.14022	1.16106				0.732865	1.26195	0				0.732865	29.9396	30
			0.733865	1.14043	1.16106				0.733865	1.24977	0				0.733865	29.9399	30
			0.734865	1.14063	1.16106				0.734865	1.23769	0				0.734865	29.9402	30
			0.735865	1.14083	1.16106				0.735865	1.22568	0				0.735865	29.9405	30
			0.736865	1.14103	1.16106				0.736865	1.21374	0				0.736865	29.9408	30
			0.737865	1.14123	1.16106				0.737865	1.20188	0				0.737865	29.9411	30
			0.738865	1.14143	1.16106				0.738865	1.19006	0				0.738865	29.9414	30
			0.739865	1.14163	1.16106				0.739865	1.17829	0				0.739865	29.9418	30
			0.740865	1.14183	1.16106				0.740865	1.16672	0				0.740865	29.9421	30
			0.741865	1.14202	1.16106				0.741865	1.15527	0				0.741865	29.9424	30
			0.742865	1.14221	1.16106				0.742865	1.14391	0				0.742865	29.9427	30
			0.743865	1.1424	1.16106				0.743865	1.13268	0				0.743865	29.9429	30
			0.744865	1.14259	1.16106				0.744865	1.12153	0				0.744865	29.9432	30
			0.745865	1.14277	1.16106				0.745865	1.11045	0				0.745865	29.9435	30
			0.746865	1.14296	1.16106				0.746865	1.09944	0				0.746865	29.9438	30
			0.747865	1.14314	1.16106				0.747865	1.08849	0				0.747865	29.9441	30
			0.748865	1.14332	1.16106				0.748865	1.07762	0				0.748865	29.9444	30
			0.749865	1.14351	1.16106				0.749865	1.06684	0				0.749865	29.9446	30
			0.750865	1.14368	1.16106				0.750865	1.05622	0				0.750865	29.9449	30
			0.751865	1.14386	1.16106				0.751865	1.04568	0				0.751865	29.9452	30
			0.752865	1.14404	1.16106				0.752865	1.03522	0				0.752865	29.9455	30
			0.753865	1.14421	1.16106				0.753865	1.02486	0				0.753865	29.9457	30
			0.754865	1.14438	1.16106				0.754865	1.01455	0				0.754865	29.946	30
			0.755865	1.14456	1.16106				0.755865	1.0043	0				0.755865	29.9463	30
			0.756865	1.14473	1.16106				0.756865	0.99409	0				0.756865	29.9465	30
			0.757865	1.1449	1.16106				0.757865	0.98392	0				0.757865	29.9468	30
			0.758865	1.14507	1.16106				0.758865	0.97386	0				0.758865	29.9471	30
			0.759865	1.14523	1.16106				0.759865	0.9639	0				0.759865	29.9473	30
			0.760865	1.1454	1.16106				0.760865	0.95411	0				0.760865	29.9476	30
			0.761865	1.14556	1.16106				0.761865	0.94439	0				0.761865	29.9478	30
			0.762865	1.14572	1.16106				0.762865	0.93474	0				0.762865	29.9481	30
			0.763865	1.14588	1.16106				0.763865	0.92517	0				0.763865	29.9483	30
			0.764865	1.14604	1.16106				0.764865	0.91567	0				0.764865	29.9486	30
			0.765865	1.1462	1.16106				0.765865	0.9062	0				0.765865	29.9488	30
			0.766865	1.14636	1.16106				0.766865	0.89678	0				0.766865	29.949	30
			0.767865	1.14652	1.16106				0.767865	0.8874	0				0.767865	29.9493	30
			0.768865	1.14667	1.16106				0.768865	0.87812	0				0.768865	29.9495	30
			0.769865	1.14683	1.16106				0.769865	0.86894	0				0.769865	29.9498	30
			0.770865	1.14698	1.16106				0.770865	0.85989	0				0.770865	29.95	30
			0.771865	1.14713	1.16106				0.771865	0.85093	0				0.771865	29.9502	30
			0.772865	1.14728	1.16106				0.772865	0.84202	0				0.772865	29.9505	30
			0.773865	1.14742	1.16106				0.773865	0.8332	0				0.773865	29.9507	30
			0.774865	1.14757	1.16106				0.774865	0.82443	0				0.774865	29.9509	30
			0.775865	1.14772	1.16106				0.775865	0.8157	0				0.775865	29.9511	30
			0.776644	1.14783	1.16106				0.776644	0.80893	0				0.776644	29.9513	30
			0.777423	1.14253	1.16106				0.777423	1.138	0				0.777423	29.9549	30
			0.778423	1.14269	1.16106				0.778423	1.12827	0				0.778423	29.9552	30
			0.779423	1.14287	1.16106				0.779423	1.11773	0				0.779423	29.9554	30
			0.780423	1.14304	1.16106				0.780423	1.10738	0				0.780423	29.9557	30
			0.781423	1.14321	1.16106				0.781423	1.09713	0				0.781423	29.956	30
			0.782423	1.14338	1.16106				0.782423	1.08699	0				0.782423	29.9563	30
			0.783423	1.14355	1.16106				0.783423	1.07693	0				0.783423	29.9565	30
			0.784423	1.14371	1.16106				0.784423	1.06693	0				0.784423	29.9568	30
			0.785423	1.14388	1.16106				0.785423	1.05699	0				0.785423	29.957	30
			0.786423	1.14404	1.16106				0.786423	1.04711	0				0.786423	29.9573	30
			0.787423	1.14421	1.16106				0.787423	1.03727	0				0.787423	29.9575	30
			0.788423	1.14437	1.16106				0.788423	1.02748	0				0.788423	29.9578	30
			0.789423	1.14453	1.16106				0.789423	1.01785	0				0.789423	29.958	30
			0.790423	1.14469	1.16106				0.790423	1.00831	0				0.790423	29.9583	30
			0.791423	1.14485	1.16106				0.791423	0.99886	0				0.791423	29.9585	30
			0.792423	1.145	1.16106				0.792423	0.9895	0				0.792423	29.9587	30
			0.793423	1.14516	1.16106				0.793423	0.98022	0				0.793423	29.959	30
			0.794423	1.14531	1.16106				0.794423	0.97099	0				0.794423	29.9592	30
			0.795423	1.14546	1.16106				0.795423	0.96182	0				0.795423	29.9595	30
			0.796423	1.14561	1.16106				0.796423	0.95271	0				0.796423	29.9597	30
			0.797423	1.14576	1.16106				0.797423	0.94366	0				0.797423	29.9599	30
			0.798423	1.14591	1.16106				0.798423	0.93468	0				0.798423	29.9601	30
			0.799423	1.14606	1.16106				0.799423	0.92583	0				0.799423	29.9604	30
			0.800423	1.1462	1.16106				0.800423	0.91705	0				0.800423	29.9606	30
			0.801423	1.14635	1.16106				0.801423	0.90834	0				0.801423	29.9608	30
			0.802423	1.14649	1.16106				0.802423	0.89971	0				0.802423	29.961	30
			0.803423	1.14663	1.16106				0.803423	0.89113	0				0.803423	29.9613	30
			0.804423	1.14678	1.16106				0.804423	0.88259	0				0.804423	29.9615	30
			0.805423	1.14692	1.16106				0.805423	0.87409	0				0.805423	29.9617	30
			0.806423	1.14706	1.16106				0.806423	0.86563	0				0.806423	29.9619	30
			0.807423	1.1472	1.16106				0.807423	0.85725	0				0.807423	29.9621	30
			0.808423	1.14733	1.16106				0.808423	0.84896	0				0.808423	29.9623	30
			0.809423	1.14747	1.16106				0.809423	0.8408	0				0.809423	29.9625	30
			0.810423	1.1476	1.16106				0.810423	0.8327	0				0.810423	29.9627	30
			0.811423	1.14773	1.16106				0.811423	0.82466	0				0.811423	29.963	30
			0.812423	1.14787	1.16106				0.812423	0.8167	0				0.812423	29.9632	30
			0.813423	1.148	1.16106				0.813423	0.80878	0				0.813423	29.9634	30
			0.814423	1.14813	1.16106				0.814423	0.8009	0				0.814423	29.9636	30
			0.815423	1.14826	1.16106				0.815423	0.79306	0				0.815423	29.9638	30
			0.816423	1.14839	1.16106				0.816423	0.78525	0				0.816423	29.964	30
			0.817423	1.14851	1.16106				0.817423	0.77752	0				0.817423	29.9642	30
			0.818423	1.14864	1.16106				0.818423	0.76988	0				0.818423	29.9643	30
			0.819423	1.14877	1.16106				0.819423	0.76234	0				0.819423	29.9645	30
			0.820423	1.14889	1.16106				0.820423	0.75487	0				0.820423	29.9647	30
			0.821423	1.14901	1.16106				0.821423	0.74746	0				0.821423	29.9649	30
			0.822423	1.14913	1.16106				0.822423	0.74011	0				0.822423	29.9651	30
			0.823423	1.14925	1.16106				0.823423	0.7328	0				0.823423	29.9653	30
			0.824423	1.14937	1.16106				0.824423	0.72553	0				0.824423	29.9655	30
			0.825202	1.14947	1.16106				0.825202	0.71989	0				0.825202	29.9656	30
			0.825981	0.80479	0.815101				0.825981	0.90483	0				0.825981	29.9638	30
			0.826981	0.80488	0.815101				0.826981	0.89682	0				0.826981	29.964	30
			0.827981	0.80498	0.815101				0.827981	0.88821	0				0.827981	29.9642	30
			0.828981	0.80508	0.815101				0.828981	0.87975	0				0.828981	29.9644	30
			0.829981	0.80517	0.815101				0.829981	0.87137	0				0.829981	29.9646	30
			0.830981	0.80527	0.815101				0.830981	0.86308	0				0.830981	29.9648	30
			0.831981	0.80537	0.815101				0.831981	0.85485	0				0.831981	29.965	30
			0.832981	0.80546	0.815101				0.832981	0.84668	0				0.832981	29.9653	30
			0.833981	0.80555	0.815101				0.833981	0.83855	0				0.833981	29.9655	30
			0.834981	0.80565	0.815101				0.834981	0.83048	0				0.834981	29.9657	30
			0.835981	0.80574	0.815101				0.835981	0.82244	0				0.835981	29.9659	30
			0.836981	0.80583	0.815101				0.836981	0.81443	0				0.836981	29.9661	30
			0.837981	0.80592	0.815101				0.837981	0.80656	0				0.837981	29.9663	30
			0.838981	0.80601	0.815101				0.838981	0.79876	0				0.838981	29.9665	30
			0.839981	0.8061	0.815101				0.839981	0.79103	0				0.839981	29.9667	30
			0.840981	0.80619	0.815101				0.840981	0.78337	0				0.840981	29.9669	30
			0.841981	0.80628	0.815101				0.841981	0.77578	0				0.841981	29.967	30
			0.842981	0.80637	0.815101				0.842981	0.76824	0				0.842981	29.9672	30
			0.843981	0.80645	0.815101				0.843981	0.76074	0				0.843981	29.9674	30
			0.844981	0.80654	0.815101				0.844981	0.75329	0				0.844981	29.9676	30
			0.845981	0.80662	0.815101				0.845981	0.74589	0				0.845981	29.9678	30
			0.846981	0.80671	0.815101				0.846981	0.73855	0				0.846981	29.968	30
			0.847981	0.80679	0.815101				0.847981	0.73131	0				0.847981	29.9682	30
			0.848981	0.80687	0.815101				0.848981	0.72413	0				0.848981	29.9683	30
			0.849981	0.80696	0.815101				0.849981	0.71701	0				0.849981	29.9685	30
			0.850981	0.80704	0.815101				0.850981	0.70995	0				0.850981	29.9687	30
			0.851981	0.80712	0.815101				0.851981	0.70293	0				0.851981	29.9689	30
			0.852981	0.8072	0.815101				0.852981	0.69595	0				0.852981	29.969	30
			0.853981	0.80728	0.815101				0.853981	0.689	0				0.853981	29.9692	30
			0.854981	0.80736	0.815101				0.854981	0.68209	0				0.854981	29.9694	30
			0.855981	0.80744	0.815101				0.855981	0.67524	0				0.855981	29.9696	30
			0.856981	0.80751	0.815101				0.856981	0.66846	0				0.856981	29.9698	30
			0.857981	0.80759	0.815101				0.857981	0.66179	0				0.857981	29.9699	30
			0.858981	0.80767	0.815101				0.858981	0.65516	0				0.858981	29.9701	30
			0.859981	0.80774	0.815101				0.859981	0.64859	0				0.859981	29.9703	30
			0.860981	0.80782	0.815101				0.860981	0.64207	0				0.860981	29.9704	30
			0.861981	0.80789	0.815101				0.861981	0.6356	0				0.861981	29.9706	30
			0.862981	0.80797	0.815101				0.862981	0.62916	0				0.862981	29.9707	30
			0.863981	0.80804	0.815101				0.863981	0.62275	0				0.863981	29.9709	30
			0.864981	0.80811	0.815101				0.864981	0.61637	0				0.864981	29.9711	30
			0.865981	0.80819	0.815101				0.865981	0.61005	0				0.865981	29.9712	30
			0.866981	0.80826	0.815101				0.866981	0.60379	0				0.866981	29.9714	30
			0.867981	0.80833	0.815101				0.867981	0.59763	0				0.867981	29.9715	30
			0.868981	0.8084	0.815101				0.868981	0.59152	0				0.868981	29.9717	30
			0.869981	0.80847	0.815101				0.869981	0.58545	0				0.869981	29.9718	30
			0.870981	0.80854	0.815101				0.870981	0.57944	0				0.870981	29.972	30
			0.871981	0.80861	0.815101				0.871981	0.57346	0				0.871981	29.9721	30
			0.872981	0.80867	0.815101				0.872981	0.56752	0				0.872981	29.9723	30
			0.87376	0.80873	0.815101				0.87376	0.56291	0				0.87376	29.9724	30
			0.874538	0.80682	0.815101				0.874538	0.74042	0				0.874538	29.9749	30
			0.875538	0.80689	0.815101				0.875538	0.734	0				0.875538	29.9751	30
			0.876538	0.80697	0.815101				0.876538	0.72718	0				0.876538	29.9753	30
			0.877538	0.80705	0.815101				0.877538	0.72047	0				0.877538	29.9754	30
			0.878538	0.80712	0.815101				0.878538	0.71382	0				0.878538	29.9756	30
			0.879538	0.8072	0.815101				0.879538	0.70725	0				0.879538	29.9758	30
			0.880538	0.80727	0.815101				0.880538	0.70072	0				0.880538	29.9759	30
			0.881538	0.80734	0.815101				0.881538	0.69424	0				0.881538	29.9761	30
			0.882538	0.80742	0.815101				0.882538	0.68779	0				0.882538	29.9762	30
			0.883538	0.80749	0.815101				0.883538	0.68139	0				0.883538	29.9764	30
			0.884538	0.80756	0.815101				0.884538	0.67502	0				0.884538	29.9766	30
			0.885538	0.80763	0.815101				0.885538	0.66867	0				0.885538	29.9767	30
			0.886538	0.8077	0.815101				0.886538	0.66243	0				0.886538	29.9769	30
			0.887538	0.80778	0.815101				0.887538	0.65624	0				0.887538	29.977	30
			0.888538	0.80784	0.815101				0.888538	0.65011	0				0.888538	29.9772	30
			0.889538	0.80791	0.815101				0.889538	0.64404	0				0.889538	29.9773	30
			0.890538	0.80798	0.815101				0.890538	0.63802	0				0.890538	29.9775	30
			0.891538	0.80805	0.815101				0.891538	0.63203	0				0.891538	29.9776	30
			0.892538	0.80812	0.815101				0.892538	0.62609	0				0.892538	29.9778	30
			0.893538	0.80818	0.815101				0.893538	0.62018	0				0.893538	29.9779	30
			0.894538	0.80825	0.815101				0.894538	0.61431	0				0.894538	29.9781	30
			0.895538	0.80832	0.815101				0.895538	0.60848	0				0.895538	29.9782	30
			0.896538	0.80838	0.815101				0.896538	0.60274	0				0.896538	29.9783	30
			0.897538	0.80845	0.815101				0.897538	0.59704	0				0.897538	29.9785	30
			0.898538	0.80851	0.815101				0.898538	0.59139	0				0.898538	29.9786	30
			0.899538	0.80857	0.815101				0.899538	0.58579	0				0.899538	29.9788	30
			0.900538	0.80864	0.815101				0.900538	0.58022	0				0.900538	29.9789	30
			0.901538	0.8087	0.815101				0.901538	0.57469	0				0.901538	29.979	30
			0.902538	0.80876	0.815101				0.902538	0.56918	0				0.902538	29.9792	30
			0.903538	0.80882	0.815101				0.903538	0.5637	0				0.903538	29.9793	30
			0.904538	0.80888	0.815101				0.904538	0.55827	0				0.904538	29.9794	30
			0.905538	0.80894	0.815101				0.905538	0.55289	0				0.905538	29.9796	30
			0.906538	0.809	0.815101				0.906538	0.54759	0				0.906538	29.9797	30
			0.907538	0.80906	0.815101				0.907538	0.54234	0				0.907538	29.9798	30
			0.908538	0.80912	0.815101				0.908538	0.53712	0				0.908538	29.98	30
			0.909538	0.80918	0.815101				0.909538	0.53195	0				0.909538	29.9801	30
			0.910538	0.80924	0.815101				0.910538	0.52682	0				0.910538	29.9802	30
			0.911538	0.8093	0.815101				0.911538	0.52171	0				0.911538	29.9803	30
			0.912538	0.80935	0.815101				0.912538	0.51662	0				0.912538	29.9805	30
			0.913538	0.80941	0.815101				0.913538	0.51157	0				0.913538	29.9806	30
			0.914538	0.80947	0.815101				0.914538	0.50656	0				0.914538	29.9807	30
			0.915538	0.80952	0.815101				0.915538	0.50159	0				0.915538	29.9808	30
			0.916538	0.80958	0.815101				0.916538	0.4967	0				0.916538	29.981	30
			0.917538	0.80963	0.815101				0.917538	0.49185	0				0.917538	29.9811	30
			0.918538	0.80969	0.815101				0.918538	0.48703	0				0.918538	29.9812	30
			0.919538	0.80974	0.815101				0.919538	0.48226	0				0.919538	29.9813	30
			0.920538	0.80979	0.815101				0.920538	0.47752	0				0.920538	29.9814	30
			0.921538	0.80985	0.815101				0.921538	0.47281	0				0.921538	29.9815	30
			0.922317	0.80989	0.815101				0.922317	0.46916	0				0.922317	29.9816	30
			0.923096	0.80859	0.815101				0.923096	0.59331	0				0.923096	29.983	30
			0.924096	0.80864	0.815101				0.924096	0.58829	0				0.924096	29.9831	30
			0.925096	0.8087	0.815101				0.925096	0.58301	0				0.925096	29.9832	30
			0.926096	0.80876	0.815101				0.926096	0.57782	0				0.926096	29.9833	30
			0.927096	0.80882	0.815101				0.927096	0.57267	0				0.927096	29.9835	30
			0.928096	0.80888	0.815101				0.928096	0.56757	0				0.928096	29.9836	30
			0.929096	0.80893	0.815101				0.929096	0.56252	0				0.929096	29.9837	30
			0.930096	0.80899	0.815101				0.930096	0.5575	0				0.930096	29.9838	30
			0.931096	0.80904	0.815101				0.931096	0.55251	0				0.931096	29.984	30
			0.932096	0.8091	0.815101				0.932096	0.54756	0				0.932096	29.9841	30
			0.933096	0.80915	0.815101				0.933096	0.54263	0				0.933096	29.9842	30
			0.934096	0.80921	0.815101				0.934096	0.53772	0				0.934096	29.9843	30
			0.935096	0.80926	0.815101				0.935096	0.53288	0				0.935096	29.9844	30
			0.936096	0.80932	0.815101				0.936096	0.52809	0				0.936096	29.9845	30
			0.937096	0.80937	0.815101				0.937096	0.52333	0				0.937096	29.9847	30
			0.938096	0.80942	0.815101				0.938096	0.51863	0				0.938096	29.9848	30
			0.939096	0.80947	0.815101				0.939096	0.51397	0				0.939096	29.9849	30
			0.940096	0.80952	0.815101				0.940096	0.50933	0				0.940096	29.985	30
			0.941096	0.80958	0.815101				0.941096	0.50473	0				0.941096	29.9851	30
			0.942096	0.80963	0.815101				0.942096	0.50016	0				0.942096	29.9852	30
			0.943096	0.80968	0.815101				0.943096	0.49562	0				0.943096	29.9853	30
			0.944096	0.80973	0.815101				0.944096	0.4911	0				0.944096	29.9855	30
			0.945096	0.80978	0.815101				0.945096	0.48665	0				0.945096	29.9856	30
			0.946096	0.80983	0.815101				0.946096	0.48224	0				0.946096	29.9857	30
			0.947096	0.80987	0.815101				0.947096	0.47785	0				0.947096	29.9858	30
			0.948096	0.80992	0.815101				0.948096	0.47351	0				0.948096	29.9859	30
			0.949096	0.80997	0.815101				0.949096	0.46921	0				0.949096	29.986	30
			0.950096	0.81002	0.815101				0.950096	0.46492	0				0.950096	29.9861	30
			0.951096	0.81006	0.815101				0.951096	0.46066	0				0.951096	29.9862	30
			0.952096	0.81011	0.815101				0.952096	0.45642	0				0.952096	29.9863	30
			0.953096	0.81016	0.815101				0.953096	0.45222	0				0.953096	29.9864	30
			0.954096	0.8102	0.815101				0.954096	0.44805	0				0.954096	29.9865	30
			0.955096	0.81025	0.815101				0.955096	0.44394	0				0.955096	29.9866	30
			0.956096	0.8103	0.815101				0.956096	0.43987	0				0.956096	29.9867	30
			0.957096	0.81034	0.815101				0.957096	0.43582	0				0.957096	29.9868	30
			0.958096	0.81038	0.815101				0.958096	0.43182	0				0.958096	29.9869	30
			0.959096	0.81043	0.815101				0.959096	0.42784	0				0.959096	29.987	30
			0.960096	0.81047	0.815101				0.960096	0.42388	0				0.960096	29.9871	30
			0.961096	0.81052	0.815101				0.961096	0.41995	0				0.961096	29.9872	30
			0.962096	0.81056	0.815101				0.962096	0.41604	0				0.962096	29.9873	30
			0.963096	0.8106	0.815101				0.963096	0.41216	0				0.963096	29.9873	30
			0.964096	0.81064	0.815101				0.964096	0.40832	0				0.964096	29.9874	30
			0.965096	0.81069	0.815101				0.965096	0.40452	0				0.965096	29.9875	30
			0.966096	0.81073	0.815101				0.966096	0.40076	0				0.966096	29.9876	30
			0.967096	0.81077	0.815101				0.967096	0.39703	0				0.967096	29.9877	30
			0.968096	0.81081	0.815101				0.968096	0.39333	0				0.968096	29.9878	30
			0.969096	0.81085	0.815101				0.969096	0.38966	0				0.969096	29.9879	30
			0.970096	0.81089	0.815101				0.970096	0.38601	0				0.970096	29.988	30
			0.970875	0.81092	0.815101				0.970875	0.38318	0				0.970875	29.9881	30
			0.971654	0.81018	0.815101				0.971654	0.4588	0				0.971654	29.9883	30
			0.972654	0.81022	0.815101				0.972654	0.45498	0				0.972654	29.9884	30
			0.973654	0.81026	0.815101				0.973654	0.45101	0				0.973654	29.9885	30
			0.974654	0.81031	0.815101				0.974654	0.44709	0				0.974654	29.9886	30
			0.975654	0.81035	0.815101				0.975654	0.44321	0				0.975654	29.9887	30
			0.976654	0.81039	0.815101				0.976654	0.43937	0				0.976654	29.9887	30
			0.977654	0.81043	0.815101				0.977654	0.43557	0				0.977654	29.9888	30
			0.978654	0.81047	0.815101				0.978654	0.43178	0				0.978654	29.9889	30
			0.979654	0.81052	0.815101				0.979654	0.42803	0				0.979654	29.989	30
			0.980654	0.81056	0.815101				0.980654	0.4243	0				0.980654	29.9891	30
			0.981654	0.8106	0.815101				0.981654	0.42059	0				0.981654	29.9892	30
			0.982654	0.81064	0.815101				0.982654	0.41689	0				0.982654	29.9893	30
			0.983654	0.81068	0.815101				0.983654	0.41325	0				0.983654	29.9894	30
			0.984654	0.81072	0.815101				0.984654	0.40964	0				0.984654	29.9895	30
			0.985654	0.81076	0.815101				0.985654	0.40606	0				0.985654	29.9895	30
			0.986654	0.81079	0.815101				0.986654	0.40251	0				0.986654	29.9896	30
			0.987654	0.81083	0.815101				0.987654	0.399	0				0.987654	29.9897	30
			0.988654	0.81087	0.815101				0.988654	0.39551	0				0.988654	29.9898	30
			0.989654	0.81091	0.815101				0.989654	0.39204	0				0.989654	29.9899	30
			0.990654	0.81095	0.815101				0.990654	0.3886	0				0.990654	29.99	30
			0.991654	0.81098	0.815101				0.991654	0.38518	0				0.991654	29.99	30
			0.992654	0.81102	0.815101				0.992654	0.38178	0				0.992654	29.9901	30
			0.993654	0.81106	0.815101				0.993654	0.37842	0				0.993654	29.9902	30
			0.994654	0.81109	0.815101				0.994654	0.37509	0				0.994654	29.9903	30
			0.995654	0.81113	0.815101				0.995654	0.37179	0				0.995654	29.9904	30
			0.996654	0.81116	0.815101				0.996654	0.36852	0				0.996654	29.9904	30
			0.997654	0.8112	0.815101				0.997654	0.36527	0				0.997654	29.9905	30
			0.998654	0.81123	0.815101				0.998654	0.36204	0				0.998654	29.9906	30
			0.999654	0.81127	0.815101				0.999654	0.35883	0				0.999654	29.9907	30
			1.00065	0.8113	0.815101				1.00065	0.35565	0				1.00065	29.9907	30
			1.00165	0.81134	0.815101				1.00165	0.35248	0				1.00165	29.9908	30
			1.00265	0.81137	0.815101				1.00265	0.34934	0				1.00265	29.9909	30
			1.00365	0.81141	0.815101				1.00365	0.34625	0				1.00365	29.991	30
			1.00465	0.81144	0.815101				1.00465	0.34317	0				1.00465	29.991	30
			1.00565	0.81147	0.815101				1.00565	0.34012	0				1.00565	29.9911	30
			1.00665	0.81151	0.815101				1.00665	0.3371	0				1.00665	29.9912	30
			1.00765	0.81154	0.815101				1.00765	0.33411	0				1.00765	29.9913	30
			1.00865	0.81157	0.815101				1.00865	0.33113	0				1.00865	29.9913	30
			1.00965	0.8116	0.815101				1.00965	0.32816	0				1.00965	29.9914	30
			1.01065	0.81163	0.815101				1.01065	0.32522	0				1.01065	29.9915	30
			1.01165	0.81167	0.815101				1.01165	0.3223	0				1.01165	29.9915	30
			1.01265	0.8117	0.815101				1.01265	0.3194	0				1.01265	29.9916	30
			1.01365	0.81173	0.815101				1.01365	0.31654	0				1.01365	29.9917	30
			1.01465	0.81176	0.815101				1.01465	0.31371	0				1.01465	29.9917	30
			1.01565	0.81179	0.815101				1.01565	0.31089	0				1.01565	29.9918	30
			1.01665	0.81182	0.815101				1.01665	0.3081	0				1.01665	29.9919	30
			1.01765	0.81185	0.815101				1.01765	0.30534	0				1.01765	29.9919	30
			1.01865	0.81188	0.815101				1.01865	0.30258	0				1.01865	29.992	30
			1.01943	0.8119	0.815101				1.01943	0.30046	0				1.01943	29.992	30
			1.02021	0.81148	0.815101				1.02021	0.3455	0				1.02021	29.992	30
			1.02121	0.81151	0.815101				1.02121	0.34265	0				1.02121	29.992	30
			1.02221	0.81154	0.815101				1.02221	0.33973	0				1.02221	29.9921	30
			1.02321	0.81157	0.815101				1.02321	0.33685	0				1.02321	29.9922	30
			1.02421	0.8116	0.815101				1.02421	0.33398	0				1.02421	29.9922	30
			1.02521	0.81163	0.815101				1.02521	0.33115	0				1.02521	29.9923	30
			1.02621	0.81166	0.815101				1.02621	0.32834	0				1.02621	29.9924	30
			1.02721	0.81169	0.815101				1.02721	0.32555	0				1.02721	29.9924	30
			1.02821	0.81172	0.815101				1.02821	0.32278	0				1.02821	29.9925	30
			1.02921	0.81175	0.815101				1.02921	0.32004	0				1.02921	29.9926	30
			1.03021	0.81178	0.815101				1.03021	0.3173	0				1.03021	29.9926	30
			1.03121	0.81181	0.815101				1.03121	0.31458	0				1.03121	29.9927	30
			1.03221	0.81184	0.815101				1.03221	0.31189	0				1.03221	29.9928	30
			1.03321	0.81187	0.815101				1.03321	0.30923	0				1.03321	29.9928	30
			1.03421	0.81189	0.815101				1.03421	0.30659	0				1.03421	29.9929	30
			1.03521	0.81192	0.815101				1.03521	0.30397	0				1.03521	29.9929	30
			1.03621	0.81195	0.815101				1.03621	0.30138	0				1.03621	29.993	30
			1.03721	0.81198	0.815101				1.03721	0.2988	0				1.03721	29.9931	30
			1.03821	0.81201	0.815101				1.03821	0.29625	0				1.03821	29.9931	30
			1.03921	0.81203	0.815101				1.03921	0.29371	0				1.03921	29.9932	30
			1.04021	0.81206	0.815101				1.04021	0.29119	0				1.04021	29.9932	30
			1.04121	0.81209	0.815101				1.04121	0.28868	0				1.04121	29.9933	30
			1.04221	0.81211	0.815101				1.04221	0.28621	0				1.04221	29.9933	30
			1.04321	0.81214	0.815101				1.04321	0.28375	0				1.04321	29.9934	30
			1.04421	0.81216	0.815101				1.04421	0.28131	0				1.04421	29.9935	30
			1.04521	0.81219	0.815101				1.04521	0.2789	0				1.04521	29.9935	30
			1.04621	0.81222	0.815101				1.04621	0.2765	0				1.04621	29.9936	30
			1.04721	0.81224	0.815101				1.04721	0.27412	0				1.04721	29.9936	30
			1.04821	0.81227	0.815101				1.04821	0.27175	0				1.04821	29.9937	30
			1.04921	0.81229	0.815101				1.04921	0.26941	0				1.04921	29.9937	30
			1.05021	0.81232	0.815101				1.05021	0.26708	0				1.05021	29.9938	30
			1.05121	0.81234	0.815101				1.05121	0.26476	0				1.05121	29.9938	30
			1.05221	0.81237	0.815101				1.05221	0.26248	0				1.05221	29.9939	30
			1.05321	0.81239	0.815101				1.05321	0.26021	0				1.05321	29.994	30
			1.05421	0.81241	0.815101				1.05421	0.25796	0				1.05421	29.994	30
			1.05521	0.81244	0.815101				1.05521	0.25573	0				1.05521	29.9941	30
			1.05621	0.81246	0.815101				1.05621	0.25351	0				1.05621	29.9941	30
			1.05721	0.81248	0.815101				1.05721	0.25132	0				1.05721	29.9942	30
			1.05821	0.81251	0.815101				1.05821	0.24913	0				1.05821	29.9942	30
			1.05921	0.81253	0.815101				1.05921	0.24697	0				1.05921	29.9943	30
			1.06021	0.81255	0.815101				1.06021	0.24481	0				1.06021	29.9943	30
			1.06121	0.81258	0.815101				1.06121	0.24268	0				1.06121	29.9944	30
			1.06221	0.8126	0.815101				1.06221	0.24057	0				1.06221	29.9944	30
			1.06321	0.81262	0.815101				1.06321	0.23847	0				1.06321	29.9945	30
			1.06421	0.81264	0.815101				1.06421	0.23639	0				1.06421	29.9945	30
			1.06521	0.81267	0.815101				1.06521	0.23433	0				1.06521	29.9945	30
			1.06621	0.81269	0.815101				1.06621	0.23229	0				1.06621	29.9946	30
			1.06721	0.81271	0.815101				1.06721	0.23026	0				1.06721	29.9946	30
			1.06799	0.81273	0.815101				1.06799	0.22869	0				1.06799	29.9947	30
			1.06877	0.81247	0.815101				1.06877	0.25566	0				1.06877	29.9943	30
			1.06977	0.81249	0.815101				1.06977	0.25359	0				1.06977	29.9944	30
			1.07077	0.81251	0.815101				1.07077	0.25147	0				1.07077	29.9944	30
			1.07177	0.81254	0.815101				1.07177	0.24938	0				1.07177	29.9945	30
			1.07277	0.81256	0.815101				1.07277	0.2473	0				1.07277	29.9945	30
			1.07377	0.81258	0.815101				1.07377	0.24525	0				1.07377	29.9946	30
			1.07477	0.8126	0.815101				1.07477	0.24321	0				1.07477	29.9946	30
			1.07577	0.81262	0.815101				1.07577	0.24119	0				1.07577	29.9947	30
			1.07677	0.81264	0.815101				1.07677	0.23918	0				1.07677	29.9947	30
			1.07777	0.81266	0.815101				1.07777	0.23719	0				1.07777	29.9948	30
			1.07877	0.81269	0.815101				1.07877	0.23521	0				1.07877	29.9948	30
			1.07977	0.81271	0.815101				1.07977	0.23324	0				1.07977	29.9948	30
			1.08077	0.81273	0.815101				1.08077	0.23129	0				1.08077	29.9949	30
			1.08177	0.81275	0.815101				1.08177	0.22936	0				1.08177	29.9949	30
			1.08277	0.81277	0.815101				1.08277	0.22744	0				1.08277	29.995	30
			1.08377	0.81279	0.815101				1.08377	0.22555	0				1.08377	29.995	30
			1.08477	0.81281	0.815101				1.08477	0.22367	0				1.08477	29.9951	30
			1.08577	0.81283	0.815101				1.08577	0.2218	0				1.08577	29.9951	30
			1.08677	0.81285	0.815101				1.08677	0.21994	0				1.08677	29.9952	30
			1.08777	0.81287	0.815101				1.08777	0.21811	0				1.08777	29.9952	30
			1.08877	0.81288	0.815101				1.08877	0.21628	0				1.08877	29.9952	30
			1.08977	0.8129	0.815101				1.08977	0.21446	0				1.08977	29.9953	30
			1.09077	0.81292	0.815101				1.09077	0.21267	0				1.09077	29.9953	30
			1.09177	0.81294	0.815101				1.09177	0.21089	0				1.09177	29.9954	30
			1.09277	0.81296	0.815101				1.09277	0.20912	0				1.09277	29.9954	30
			1.09377	0.81298	0.815101				1.09377	0.20737	0				1.09377	29.9955	30
			1.09477	0.813	0.815101				1.09477	0.20563	0				1.09477	29.9955	30
			1.09577	0.81301	0.815101				1.09577	0.2039	0				1.09577	29.9955	30
			1.09677	0.81303	0.815101				1.09677	0.20219	0				1.09677	29.9956	30
			1.09777	0.81305	0.815101				1.09777	0.20049	0				1.09777	29.9956	30
			1.09877	0.81307	0.815101				1.09877	0.1988	0				1.09877	29.9956	30
			1.09977	0.81309	0.815101				1.09977	0.19712	0				1.09977	29.9957	30
			1.10077	0.8131	0.815101				1.10077	0.19546	0				1.10077	29.9957	30
			1.10177	0.81312	0.815101				1.10177	0.19382	0				1.10177	29.9958	30
			1.10277	0.81314	0.815101				1.10277	0.19219	0				1.10277	29.9958	30
			1.10377	0.81315	0.815101				1.10377	0.19057	0				1.10377	29.9958	30
			1.10477	0.81317	0.815101				1.10477	0.18896	0				1.10477	29.9959	30
			1.10577	0.81319	0.815101				1.10577	0.18737	0				1.10577	29.9959	30
			1.10677	0.8132	0.815101				1.10677	0.18579	0				1.10677	29.9959	30
			1.10777	0.81322	0.815101				1.10777	0.18422	0				1.10777	29.996	30
			1.10877	0.81324	0.815101				1.10877	0.18266	0				1.10877	29.996	30
			1.10977	0.81325	0.815101				1.10977	0.18111	0				1.10977	29.996	30
			1.11077	0.81327	0.815101				1.11077	0.17958	0				1.11077	29.9961	30
			1.11177	0.81329	0.815101				1.11177	0.17806	0				1.11177	29.9961	30
			1.11277	0.8133	0.815101				1.11277	0.17655	0				1.11277	29.9962	30
			1.11377	0.81332	0.815101				1.11377	0.17506	0				1.11377	29.9962	30
			1.11477	0.81333	0.815101				1.11477	0.17358	0				1.11477	29.9962	30
			1.11577	0.81335	0.815101				1.11577	0.1721	0				1.11577	29.9962	30
			1.11655	0.81336	0.815101				1.11655	0.17096	0				1.11655	29.9963	30
			1.11733	0.81323	0.815101				1.11733	0.18506	0				1.11733	29.996	30
			1.11833	0.81324	0.815101				1.11833	0.18357	0				1.11833	29.9961	30
			1.11933	0.81326	0.815101				1.11933	0.18207	0				1.11933	29.9961	30
			1.12033	0.81327	0.815101				1.12033	0.18058	0				1.12033	29.9961	30
			1.12133	0.81329	0.815101				1.12133	0.1791	0				1.12133	29.9962	30
			1.12233	0.81331	0.815101				1.12233	0.17764	0				1.12233	29.9962	30
			1.12333	0.81332	0.815101				1.12333	0.17619	0				1.12333	29.9962	30
			1.12433	0.81334	0.815101				1.12433	0.17474	0				1.12433	29.9962	30
			1.12533	0.81335	0.815101				1.12533	0.17331	0				1.12533	29.9963	30
			1.12633	0.81337	0.815101				1.12633	0.1719	0				1.12633	29.9963	30
			1.12733	0.81338	0.815101				1.12733	0.17048	0				1.12733	29.9963	30
			1.12833	0.81339	0.815101				1.12833	0.16908	0				1.12833	29.9964	30
			1.12933	0.81341	0.815101				1.12933	0.1677	0				1.12933	29.9964	30
			1.13033	0.81342	0.815101				1.13033	0.16632	0				1.13033	29.9964	30
			1.13133	0.81344	0.815101				1.13133	0.16496	0				1.13133	29.9965	30
			1.13233	0.81345	0.815101				1.13233	0.16361	0				1.13233	29.9965	30
			1.13333	0.81347	0.815101				1.13333	0.16226	0				1.13333	29.9965	30
			1.13433	0.81348	0.815101				1.13433	0.16093	0				1.13433	29.9966	30
			1.13533	0.81349	0.815101				1.13533	0.15961	0				1.13533	29.9966	30
			1.13633	0.81351	0.815101				1.13633	0.1583	0				1.13633	29.9966	30
			1.13733	0.81352	0.815101				1.13733	0.157	0				1.13733	29.9966	30
			1.13833	0.81353	0.815101				1.13833	0.15571	0				1.13833	29.9967	30
			1.13933	0.81355	0.815101				1.13933	0.15443	0				1.13933	29.9967	30
			1.14033	0.81356	0.815101				1.14033	0.15316	0				1.14033	29.9967	30
			1.14133	0.81357	0.815101				1.14133	0.1519	0				1.14133	29.9968	30
			1.14233	0.81359	0.815101				1.14233	0.15065	0				1.14233	29.9968	30
			1.14333	0.8136	0.815101				1.14333	0.14941	0				1.14333	29.9968	30
			1.14433	0.81361	0.815101				1.14433	0.14818	0				1.14433	29.9968	30
			1.14533	0.81362	0.815101				1.14533	0.14696	0				1.14533	29.9969	30
			1.14633	0.81364	0.815101				1.14633	0.14575	0				1.14633	29.9969	30
			1.14733	0.81365	0.815101				1.14733	0.14455	0				1.14733	29.9969	30
			1.14833	0.81366	0.815101				1.14833	0.14336	0				1.14833	29.9969	30
			1.14933	0.81367	0.815101				1.14933	0.14218	0				1.14933	29.997	30
			1.15033	0.81369	0.815101				1.15033	0.141	0				1.15033	29.997	30
			1.15133	0.8137	0.815101				1.15133	0.13984	0				1.15133	29.997	30
			1.15233	0.81371	0.815101				1.15233	0.13869	0				1.15233	29.9971	30
			1.15333	0.81372	0.815101				1.15333	0.13754	0				1.15333	29.9971	30
			1.15433	0.81373	0.815101				1.15433	0.13641	0				1.15433	29.9971	30
			1.15533	0.81374	0.815101				1.15533	0.13528	0				1.15533	29.9971	30
			1.15633	0.81376	0.815101				1.15633	0.13416	0				1.15633	29.9972	30
			1.15733	0.81377	0.815101				1.15733	0.13305	0				1.15733	29.9972	30
			1.15833	0.81378	0.815101				1.15833	0.13195	0				1.15833	29.9972	30
			1.15933	0.81379	0.815101				1.15933	0.13086	0				1.15933	29.9972	30
			1.16033	0.8138	0.815101				1.16033	0.12977	0				1.16033	29.9973	30
			1.16133	0.81381	0.815101				1.16133	0.1287	0				1.16133	29.9973	30
			1.16233	0.81382	0.815101				1.16233	0.12763	0				1.16233	29.9973	30
			1.16333	0.81383	0.815101				1.16333	0.12658	0				1.16333	29.9973	30
			1.16433	0.81384	0.815101				1.16433	0.12553	0				1.16433	29.9974	30
			1.16511	0.81385	0.815101				1.16511	0.12472	0				1.16511	29.9974	30
			1.16588	0.81379	0.815101				1.16588	0.13161	0				1.16588	29.9972	30
			1.16688	0.8138	0.815101				1.16688	0.13056	0				1.16688	29.9972	30
			1.16788	0.81381	0.815101				1.16788	0.12951	0				1.16788	29.9973	30
			1.16888	0.81382	0.815101				1.16888	0.12846	0				1.16888	29.9973	30
			1.16988	0.81383	0.815101				1.16988	0.12742	0				1.16988	29.9973	30
			1.17088	0.81384	0.815101				1.17088	0.1264	0				1.17088	29.9973	30
			1.17188	0.81385	0.815101				1.17188	0.12538	0				1.17188	29.9974	30
			1.17288	0.81386	0.815101				1.17288	0.12436	0				1.17288	29.9974	30
			1.17388	0.81387	0.815101				1.17388	0.12336	0				1.17388	29.9974	30
			1.17488	0.81388	0.815101				1.17488	0.12236	0				1.17488	29.9974	30
			1.17588	0.81389	0.815101				1.17588	0.12137	0				1.17588	29.9974	30
			1.17688	0.8139	0.815101				1.17688	0.12039	0				1.17688	29.9975	30
			1.17788	0.81391	0.815101				1.17788	0.11941	0				1.17788	29.9975	30
			1.17888	0.81392	0.815101				1.17888	0.11845	0				1.17888	29.9975	30
			1.17988	0.81393	0.815101				1.17988	0.11749	0				1.17988	29.9975	30
			1.18088	0.81394	0.815101				1.18088	0.11654	0				1.18088	29.9976	30
			1.18188	0.81395	0.815101				1.18188	0.1156	0				1.18188	29.9976	30
			1.18288	0.81396	0.815101				1.18288	0.11466	0				1.18288	29.9976	30
			1.18388	0.81397	0.815101				1.18388	0.11373	0				1.18388	29.9976	30
			1.18488	0.81398	0.815101				1.18488	0.11281	0				1.18488	29.9976	30
			1.18588	0.81399	0.815101				1.18588	0.1119	0				1.18588	29.9977	30
			1.18688	0.814	0.815101				1.18688	0.11099	0				1.18688	29.9977	30
			1.18788	0.81401	0.815101				1.18788	0.11009	0				1.18788	29.9977	30
			1.18888	0.81402	0.815101				1.18888	0.1092	0				1.18888	29.9977	30
			1.18988	0.81403	0.815101				1.18988	0.10832	0				1.18988	29.9977	30
			1.19088	0.81404	0.815101				1.19088	0.10744	0				1.19088	29.9977	30
			1.19188	0.81405	0.815101				1.19188	0.10657	0				1.19188	29.9978	30
			1.19288	0.81405	0.815101				1.19288	0.1057	0				1.19288	29.9978	30
			1.19388	0.81406	0.815101				1.19388	0.10485	0				1.19388	29.9978	30
			1.19488	0.81407	0.815101				1.19488	0.104	0				1.19488	29.9978	30
			1.19588	0.81408	0.815101				1.19588	0.10315	0				1.19588	29.9978	30
			1.19688	0.81409	0.815101				1.19688	0.10231	0				1.19688	29.9979	30
			1.19788	0.8141	0.815101				1.19788	0.10148	0				1.19788	29.9979	30
			1.19888	0.81411	0.815101				1.19888	0.10066	0				1.19888	29.9979	30
			1.19988	0.81411	0.815101				1.19988	0.09984	0				1.19988	29.9979	30
			1.20088	0.81412	0.815101				1.20088	0.09903	0				1.20088	29.9979	30
			1.20188	0.81413	0.815101				1.20188	0.09823	0				1.20188	29.9979	30
			1.20288	0.81414	0.815101				1.20288	0.09743	0				1.20288	29.998	30
			1.20388	0.81415	0.815101				1.20388	0.09664	0				1.20388	29.998	30
			1.20488	0.81416	0.815101				1.20488	0.09585	0				1.20488	29.998	30
			1.20588	0.81416	0.815101				1.20588	0.09507	0				1.20588	29.998	30
			1.20688	0.81417	0.815101				1.20688	0.0943	0				1.20688	29.998	30
			1.20788	0.81418	0.815101				1.20788	0.09353	0				1.20788	29.998	30
			1.20888	0.81419	0.815101				1.20888	0.09277	0				1.20888	29.9981	30
			1.20988	0.81419	0.815101				1.20988	0.09201	0				1.20988	29.9981	30
			1.21088	0.8142	0.815101				1.21088	0.09127	0				1.21088	29.9981	30
			1.21188	0.81421	0.815101				1.21188	0.09052	0				1.21188	29.9981	30
			1.21288	0.81422	0.815101				1.21288	0.08979	0				1.21288	29.9981	30
			1.21366	0.81422	0.815101				1.21366	0.08922	0				1.21366	29.9981	30
			1.21444	0.81418	0.815101				1.21444	0.09361	0				1.21444	29.998	30
			1.21544	0.81419	0.815101				1.21544	0.09287	0				1.21544	29.998	30
			1.21644	0.8142	0.815101				1.21644	0.09214	0				1.21644	29.998	30
			1.21744	0.8142	0.815101				1.21744	0.09141	0				1.21744	29.9981	30
			1.21844	0.81421	0.815101				1.21844	0.09069	0				1.21844	29.9981	30
			1.21944	0.81422	0.815101				1.21944	0.08998	0				1.21944	29.9981	30
			1.22044	0.81423	0.815101				1.22044	0.08927	0				1.22044	29.9981	30
			1.22144	0.81423	0.815101				1.22144	0.08856	0				1.22144	29.9981	30
			1.22244	0.81424	0.815101				1.22244	0.08786	0				1.22244	29.9981	30
			1.22344	0.81425	0.815101				1.22344	0.08717	0				1.22344	29.9981	30
			1.22444	0.81425	0.815101				1.22444	0.08648	0				1.22444	29.9982	30
			1.22544	0.81426	0.815101				1.22544	0.0858	0				1.22544	29.9982	30
			1.22644	0.81427	0.815101				1.22644	0.08512	0				1.22644	29.9982	30
			1.22744	0.81427	0.815101				1.22744	0.08445	0				1.22744	29.9982	30
			1.22844	0.81428	0.815101				1.22844	0.08379	0				1.22844	29.9982	30
			1.22944	0.81429	0.815101				1.22944	0.08313	0				1.22944	29.9982	30
			1.23044	0.81429	0.815101				1.23044	0.08247	0				1.23044	29.9982	30
			1.23144	0.8143	0.815101				1.23144	0.08182	0				1.23144	29.9983	30
			1.23244	0.81431	0.815101				1.23244	0.08117	0				1.23244	29.9983	30
			1.23344	0.81431	0.815101				1.23344	0.08053	0				1.23344	29.9983	30
			1.23444	0.81432	0.815101				1.23444	0.0799	0				1.23444	29.9983	30
			1.23544	0.81433	0.815101				1.23544	0.07927	0				1.23544	29.9983	30
			1.23644	0.81433	0.815101				1.23644	0.07864	0				1.23644	29.9983	30
			1.23744	0.81434	0.815101				1.23744	0.07802	0				1.23744	29.9983	30
			1.23844	0.81435	0.815101				1.23844	0.07741	0				1.23844	29.9984	30
			1.23944	0.81435	0.815101				1.23944	0.0768	0				1.23944	29.9984	30
			1.24044	0.81436	0.815101				1.24044	0.07619	0				1.24044	29.9984	30
			1.24144	0.81436	0.815101				1.24144	0.07559	0				1.24144	29.9984	30
			1.24244	0.81437	0.815101				1.24244	0.07499	0				1.24244	29.9984	30
			1.24344	0.81438	0.815101				1.24344	0.0744	0				1.24344	29.9984	30
			1.24444	0.81438	0.815101				1.24444	0.07382	0				1.24444	29.9984	30
			1.24544	0.81439	0.815101				1.24544	0.07323	0				1.24544	29.9985	30
			1.24644	0.81439	0.815101				1.24644	0.07266	0				1.24644	29.9985	30
			1.24744	0.8144	0.815101				1.24744	0.07208	0				1.24744	29.9985	30
			1.24844	0.8144	0.815101				1.24844	0.07151	0				1.24844	29.9985	30
			1.24944	0.81441	0.815101				1.24944	0.07095	0				1.24944	29.9985	30
			1.25044	0.81442	0.815101				1.25044	0.07039	0				1.25044	29.9985	30
			1.25144	0.81442	0.815101				1.25144	0.06984	0				1.25144	29.9985	30
			1.25244	0.81443	0.815101				1.25244	0.06929	0				1.25244	29.9985	30
			1.25344	0.81443	0.815101				1.25344	0.06874	0				1.25344	29.9986	30
			1.25444	0.81444	0.815101				1.25444	0.0682	0				1.25444	29.9986	30
			1.25544	0.81444	0.815101				1.25544	0.06766	0				1.25544	29.9986	30
			1.25644	0.81445	0.815101				1.25644	0.06713	0				1.25644	29.9986	30
			1.25744	0.81445	0.815101				1.25744	0.0666	0				1.25744	29.9986	30
			1.25844	0.81446	0.815101				1.25844	0.06607	0				1.25844	29.9986	30
			1.25944	0.81446	0.815101				1.25944	0.06555	0				1.25944	29.9986	30
			1.26044	0.81447	0.815101				1.26044	0.06504	0				1.26044	29.9986	30
			1.26144	0.81447	0.815101				1.26144	0.06452	0				1.26144	29.9986	30
			1.26222	0.81448	0.815101				1.26222	0.06413	0				1.26222	29.9987	30
			1.263	0.81448	0.815101				1.263	0.06382	0				1.263	29.9987	30
			1.264	0.81449	0.815101				1.264	0.06332	0				1.264	29.9987	30
			1.265	0.81449	0.815101				1.265	0.06282	0				1.265	29.9987	30
			1.266	0.8145	0.815101				1.266	0.06232	0				1.266	29.9987	30
			1.267	0.8145	0.815101				1.267	0.06183	0				1.267	29.9987	30
			1.268	0.81451	0.815101				1.268	0.06135	0				1.268	29.9987	30
			1.269	0.81451	0.815101				1.269	0.06086	0				1.269	29.9987	30
			1.27	0.81452	0.815101				1.27	0.06038	0				1.27	29.9987	30
			1.271	0.81452	0.815101				1.271	0.05991	0				1.271	29.9987	30
			1.272	0.81453	0.815101				1.272	0.05944	0				1.272	29.9988	30
			1.273	0.81453	0.815101				1.273	0.05897	0				1.273	29.9988	30
			1.274	0.81453	0.815101				1.274	0.0585	0				1.274	29.9988	30
			1.275	0.81454	0.815101				1.275	0.05804	0				1.275	29.9988	30
			1.276	0.81454	0.815101				1.276	0.05759	0				1.276	29.9988	30
			1.277	0.81455	0.815101				1.277	0.05713	0				1.277	29.9988	30
			1.278	0.81455	0.815101				1.278	0.05668	0				1.278	29.9988	30
			1.279	0.81456	0.815101				1.279	0.05624	0				1.279	29.9988	30
			1.28	0.81456	0.815101				1.28	0.05579	0				1.28	29.9988	30
			1.281	0.81457	0.815101				1.281	0.05535	0				1.281	29.9988	30
			1.282	0.81457	0.815101				1.282	0.05492	0				1.282	29.9989	30
			1.283	0.81457	0.815101				1.283	0.05449	0				1.283	29.9989	30
			1.284	0.81458	0.815101				1.284	0.05406	0				1.284	29.9989	30
			1.285	0.81458	0.815101				1.285	0.05363	0				1.285	29.9989	30
			1.286	0.81459	0.815101				1.286	0.05321	0				1.286	29.9989	30
			1.287	0.81459	0.815101				1.287	0.05279	0				1.287	29.9989	30
			1.288	0.8146	0.815101				1.288	0.05237	0				1.288	29.9989	30
			1.289	0.8146	0.815101				1.289	0.05196	0				1.289	29.9989	30
			1.29	0.8146	0.815101				1.29	0.05155	0				1.29	29.9989	30
			1.291	0.81461	0.815101				1.291	0.05115	0				1.291	29.9989	30
			1.292	0.81461	0.815101				1.292	0.05075	0				1.292	29.9989	30
			1.293	0.81462	0.815101				1.293	0.05035	0				1.293	29.999	30
			1.294	0.81462	0.815101				1.294	0.04995	0				1.294	29.999	30
			1.295	0.81462	0.815101				1.295	0.04956	0				1.295	29.999	30
			1.296	0.81463	0.815101				1.296	0.04917	0				1.296	29.999	30
			1.297	0.81463	0.815101				1.297	0.04878	0				1.297	29.999	30
			1.298	0.81464	0.815101				1.298	0.0484	0				1.298	29.999	30
			1.299	0.81464	0.815101				1.299	0.04801	0				1.299	29.999	30
			1.3	0.81464	0.815101				1.3	0.04764	0				1.3	29.999	30
			1.301	0.81465	0.815101				1.301	0.04726	0				1.301	29.999	30
			1.302	0.81465	0.815101				1.302	0.04689	0				1.302	29.999	30
			1.303	0.81465	0.815101				1.303	0.04652	0				1.303	29.999	30
			1.304	0.81466	0.815101				1.304	0.04615	0				1.304	29.999	30
			1.305	0.81466	0.815101				1.305	0.04579	0				1.305	29.9991	30
			1.306	0.81466	0.815101				1.306	0.04543	0				1.306	29.9991	30
			1.307	0.81467	0.815101				1.307	0.04507	0				1.307	29.9991	30
			1.308	0.81467	0.815101				1.308	0.04472	0				1.308	29.9991	30
			1.309	0.81468	0.815101				1.309	0.04437	0				1.309	29.9991	30
			1.31	0.81468	0.815101				1.31	0.04402	0				1.31	29.9991	30
			1.31078	0.81468	0.815101				1.31078	0.04375	0				1.31078	29.9991	30
			1.31156	0.8147	0.815101				1.31156	0.0419	0				1.31156	29.9992	30
			1.31256	0.8147	0.815101				1.31256	0.04156	0				1.31256	29.9992	30
			1.31356	0.81471	0.815101				1.31356	0.04122	0				1.31356	29.9992	30
			1.31456	0.81471	0.815101				1.31456	0.04088	0				1.31456	29.9992	30
			1.31556	0.81471	0.815101				1.31556	0.04055	0				1.31556	29.9992	30
			1.31656	0.81472	0.815101				1.31656	0.04022	0				1.31656	29.9992	30
			1.31756	0.81472	0.815101				1.31756	0.03989	0				1.31756	29.9992	30
			1.31856	0.81472	0.815101				1.31856	0.03956	0				1.31856	29.9992	30
			1.31956	0.81473	0.815101				1.31956	0.03924	0				1.31956	29.9992	30
			1.32056	0.81473	0.815101				1.32056	0.03892	0				1.32056	29.9992	30
			1.32156	0.81473	0.815101				1.32156	0.0386	0				1.32156	29.9992	30
			1.32256	0.81473	0.815101				1.32256	0.03828	0				1.32256	29.9992	30
			1.32356	0.81474	0.815101				1.32356	0.03797	0				1.32356	29.9992	30
			1.32456	0.81474	0.815101				1.32456	0.03766	0				1.32456	29.9992	30
			1.32556	0.81474	0.815101				1.32556	0.03735	0				1.32556	29.9993	30
			1.32656	0.81475	0.815101				1.32656	0.03704	0				1.32656	29.9993	30
			1.32756	0.81475	0.815101				1.32756	0.03674	0				1.32756	29.9993	30
			1.32856	0.81475	0.815101				1.32856	0.03644	0				1.32856	29.9993	30
			1.32956	0.81476	0.815101				1.32956	0.03614	0				1.32956	29.9993	30
			1.33056	0.81476	0.815101				1.33056	0.03584	0				1.33056	29.9993	30
			1.33156	0.81476	0.815101				1.33156	0.03555	0				1.33156	29.9993	30
			1.33256	0.81476	0.815101				1.33256	0.03526	0				1.33256	29.9993	30
			1.33356	0.81477	0.815101				1.33356	0.03497	0				1.33356	29.9993	30
			1.33456	0.81477	0.815101				1.33456	0.03468	0				1.33456	29.9993	30
			1.33556	0.81477	0.815101				1.33556	0.03439	0				1.33556	29.9993	30
			1.33656	0.81478	0.815101				1.33656	0.03411	0				1.33656	29.9993	30
			1.33756	0.81478	0.815101				1.33756	0.03383	0				1.33756	29.9993	30
			1.33856	0.81478	0.815101				1.33856	0.03355	0				1.33856	29.9993	30
			1.33956	0.81478	0.815101				1.33956	0.03328	0				1.33956	29.9993	30
			1.34056	0.81479	0.815101				1.34056	0.033	0				1.34056	29.9993	30
			1.34156	0.81479	0.815101				1.34156	0.03273	0				1.34156	29.9994	30
			1.34256	0.81479	0.815101				1.34256	0.03246	0				1.34256	29.9994	30
			1.34356	0.81479	0.815101				1.34356	0.03219	0				1.34356	29.9994	30
			1.34456	0.8148	0.815101				1.34456	0.03193	0				1.34456	29.9994	30
			1.34556	0.8148	0.815101				1.34556	0.03166	0				1.34556	29.9994	30
			1.34656	0.8148	0.815101				1.34656	0.0314	0				1.34656	29.9994	30
			1.34756	0.81481	0.815101				1.34756	0.03114	0				1.34756	29.9994	30
			1.34856	0.81481	0.815101				1.34856	0.03089	0				1.34856	29.9994	30
			1.34956	0.81481	0.815101				1.34956	0.03063	0				1.34956	29.9994	30
			1.35056	0.81481	0.815101				1.35056	0.03038	0				1.35056	29.9994	30
			1.35156	0.81481	0.815101				1.35156	0.03013	0				1.35156	29.9994	30
			1.35256	0.81482	0.815101				1.35256	0.02988	0				1.35256	29.9994	30
			1.35356	0.81482	0.815101				1.35356	0.02963	0				1.35356	29.9994	30
			1.35456	0.81482	0.815101				1.35456	0.02939	0				1.35456	29.9994	30
			1.35556	0.81482	0.815101				1.35556	0.02914	0				1.35556	29.9994	30
			1.35656	0.81483	0.815101				1.35656	0.0289	0				1.35656	29.9994	30
			1.35756	0.81483	0.815101				1.35756	0.02866	0				1.35756	29.9994	30
			1.35856	0.81483	0.815101				1.35856	0.02842	0				1.35856	29.9994	30
			1.35934	0.81483	0.815101				1.35934	0.02824	0				1.35934	29.9994	30
			1.36012	0.81486	0.815101				1.36012	0.02516	0				1.36012	29.9996	30
			1.36112	0.81487	0.815101				1.36112	0.02492	0				1.36112	29.9996	30
			1.36212	0.81487	0.815101				1.36212	0.02468	0				1.36212	29.9996	30
			1.36312	0.81487	0.815101				1.36312	0.02444	0				1.36312	29.9996	30
			1.36412	0.81487	0.815101				1.36412	0.02421	0				1.36412	29.9996	30
			1.36512	0.81488	0.815101				1.36512	0.02397	0				1.36512	29.9996	30
			1.36612	0.81488	0.815101				1.36612	0.02374	0				1.36612	29.9996	30
			1.36712	0.81488	0.815101				1.36712	0.02351	0				1.36712	29.9996	30
			1.36812	0.81488	0.815101				1.36812	0.02329	0				1.36812	29.9996	30
			1.36912	0.81488	0.815101				1.36912	0.02306	0				1.36912	29.9996	30
			1.37012	0.81489	0.815101				1.37012	0.02284	0				1.37012	29.9996	30
			1.37112	0.81489	0.815101				1.37112	0.02261	0				1.37112	29.9996	30
			1.37212	0.81489	0.815101				1.37212	0.02239	0				1.37212	29.9996	30
			1.37312	0.81489	0.815101				1.37312	0.02217	0				1.37312	29.9996	30
			1.37412	0.8149	0.815101				1.37412	0.02195	0				1.37412	29.9996	30
			1.37512	0.8149	0.815101				1.37512	0.02174	0				1.37512	29.9996	30
			1.37612	0.8149	0.815101				1.37612	0.02153	0				1.37612	29.9996	30
			1.37712	0.8149	0.815101				1.37712	0.02131	0				1.37712	29.9996	30
			1.37812	0.8149	0.815101				1.37812	0.0211	0				1.37812	29.9997	30
			1.37912	0.81491	0.815101				1.37912	0.02089	0				1.37912	29.9997	30
			1.38012	0.81491	0.815101				1.38012	0.02069	0				1.38012	29.9997	30
			1.38112	0.81491	0.815101				1.38112	0.02048	0				1.38112	29.9997	30
			1.38212	0.81491	0.815101				1.38212	0.02028	0				1.38212	29.9997	30
			1.38312	0.81491	0.815101				1.38312	0.02007	0				1.38312	29.9997	30
			1.38412	0.81492	0.815101				1.38412	0.01987	0				1.38412	29.9997	30
			1.38512	0.81492	0.815101				1.38512	0.01967	0				1.38512	29.9997	30
			1.38612	0.81492	0.815101				1.38612	0.01948	0				1.38612	29.9997	30
			1.38712	0.81492	0.815101				1.38712	0.01928	0				1.38712	29.9997	30
			1.38812	0.81492	0.815101				1.38812	0.01909	0				1.38812	29.9997	30
			1.38912	0.81492	0.815101				1.38912	0.01889	0				1.38912	29.9997	30
			1.39012	0.81493	0.815101				1.39012	0.0187	0				1.39012	29.9997	30
			1.39112	0.81493	0.815101				1.39112	0.01851	0				1.39112	29.9997	30
			1.39212	0.81493	0.815101				1.39212	0.01832	0				1.39212	29.9997	30
			1.39312	0.81493	0.815101				1.39312	0.01814	0				1.39312	29.9997	30
			1.39412	0.81493	0.815101				1.39412	0.01795	0				1.39412	29.9997	30
			1.39512	0.81494	0.815101				1.39512	0.01777	0				1.39512	29.9997	30
			1.39612	0.81494	0.815101				1.39612	0.01758	0				1.39612	29.9997	30
			1.39712	0.81494	0.815101				1.39712	0.0174	0				1.39712	29.9997	30
			1.39812	0.81494	0.815101				1.39812	0.01722	0				1.39812	29.9997	30
			1.39912	0.81494	0.815101				1.39912	0.01704	0				1.39912	29.9997	30
			1.40012	0.81494	0.815101				1.40012	0.01687	0				1.40012	29.9997	30
			1.40112	0.81495	0.815101				1.40112	0.01669	0				1.40112	29.9997	30
			1.40212	0.81495	0.815101				1.40212	0.01652	0				1.40212	29.9998	30
			1.40312	0.81495	0.815101				1.40312	0.01634	0				1.40312	29.9998	30
			1.40412	0.81495	0.815101				1.40412	0.01617	0				1.40412	29.9998	30
			1.40512	0.81495	0.815101				1.40512	0.016	0				1.40512	29.9998	30
			1.40612	0.81495	0.815101				1.40612	0.01583	0				1.40612	29.9998	30
			1.40712	0.81496	0.815101				1.40712	0.01567	0				1.40712	29.9998	30
			1.40789	0.81496	0.815101				1.40789	0.01554	0				1.40789	29.9998	30
			1.40867	0.93827	0.938423				1.40867	0.01456	0				1.40867	29.9998	30
			1.40967	0.93827	0.938423				1.40967	0.01438	0				1.40967	29.9998	30
			1.41067	0.93827	0.938423				1.41067	0.01419	0				1.41067	29.9998	30
			1.41167	0.93827	0.938423				1.41167	0.014	0				1.41167	29.9998	30
			1.41267	0.93827	0.938423				1.41267	0.01381	0				1.41267	29.9998	30
			1.41367	0.93828	0.938423				1.41367	0.01363	0				1.41367	29.9998	30
			1.41467	0.93828	0.938423				1.41467	0.01344	0				1.41467	29.9998	30
			1.41567	0.93828	0.938423				1.41567	0.01326	0				1.41567	29.9998	30
			1.41667	0.93828	0.938423				1.41667	0.01308	0				1.41667	29.9998	30
			1.41767	0.93828	0.938423				1.41767	0.0129	0				1.41767	29.9998	30
			1.41867	0.93829	0.938423				1.41867	0.01272	0				1.41867	29.9998	30
			1.41967	0.93829	0.938423				1.41967	0.01255	0				1.41967	29.9998	30
			1.42067	0.93829	0.938423				1.42067	0.01237	0				1.42067	29.9998	30
			1.42167	0.93829	0.938423				1.42167	0.0122	0				1.42167	29.9998	30
			1.42267	0.93829	0.938423				1.42267	0.01202	0				1.42267	29.9998	30
			1.42367	0.9383	0.938423				1.42367	0.01185	0				1.42367	29.9999	30
			1.42467	0.9383	0.938423				1.42467	0.01168	0				1.42467	29.9999	30
			1.42567	0.9383	0.938423				1.42567	0.01151	0				1.42567	29.9999	30
			1.42667	0.9383	0.938423				1.42667	0.01135	0				1.42667	29.9999	30
			1.42767	0.9383	0.938423				1.42767	0.01118	0				1.42767	29.9999	30
			1.42867	0.9383	0.938423				1.42867	0.01102	0				1.42867	29.9999	30
			1.42967	0.93831	0.938423				1.42967	0.01086	0				1.42967	29.9999	30
			1.43067	0.93831	0.938423				1.43067	0.01069	0				1.43067	29.9999	30
			1.43167	0.93831	0.938423				1.43167	0.01053	0				1.43167	29.9999	30
			1.43267	0.93831	0.938423				1.43267	0.01037	0				1.43267	29.9999	30
			1.43367	0.93831	0.938423				1.43367	0.01022	0				1.43367	29.9999	30
			1.43467	0.93832	0.938423				1.43467	0.01006	0				1.43467	29.9999	30
			1.43567	0.93832	0.938423				1.43567	0.0099	0				1.43567	29.9999	30
			1.43667	0.93832	0.938423				1.43667	0.00975	0				1.43667	29.9999	30
			1.43767	0.93832	0.938423				1.43767	0.0096	0				1.43767	29.9999	30
			1.43867	0.93832	0.938423				1.43867	0.00944	0				1.43867	29.9999	30
			1.43967	0.93832	0.938423				1.43967	0.00929	0				1.43967	29.9999	30
			1.44067	0.93833	0.938423				1.44067	0.00914	0				1.44067	29.9999	30
			1.44167	0.93833	0.938423				1.44167	0.009	0				1.44167	29.9999	30
			1.44267	0.93833	0.938423				1.44267	0.00885	0				1.44267	29.9999	30
			1.44367	0.93833	0.938423				1.44367	0.0087	0				1.44367	29.9999	30
			1.44467	0.93833	0.938423				1.44467	0.00856	0				1.44467	29.9999	30
			1.44567	0.93833	0.938423				1.44567	0.00841	0				1.44567	29.9999	30
			1.44667	0.93834	0.938423				1.44667	0.00827	0				1.44667	29.9999	30
			1.44767	0.93834	0.938423				1.44767	0.00813	0				1.44767	29.9999	30
			1.44867	0.93834	0.938423				1.44867	0.00799	0				1.44867	29.9999	30
			1.44967	0.93834	0.938423				1.44967	0.00785	0				1.44967	29.9999	30
			1.45067	0.93834	0.938423				1.45067	0.00771	0				1.45067	29.9999	30
			1.45167	0.93834	0.938423				1.45167	0.00757	0				1.45167	29.9999	30
			1.45267	0.93834	0.938423				1.45267	0.00744	0				1.45267	29.9999	30
			1.45367	0.93835	0.938423				1.45367	0.0073	0				1.45367	29.9999	30
			1.45467	0.93835	0.938423				1.45467	0.00717	0				1.45467	29.9999	30
			1.45567	0.93835	0.938423				1.45567	0.00704	0				1.45567	30	30
			1.45645	0.93835	0.938423				1.45645	0.00693	0				1.45645	30	30
			1.45723	0.93837	0.938423				1.45723	0.0047	0				1.45723	29.9999	30
			1.45823	0.93838	0.938423				1.45823	0.00454	0				1.45823	29.9999	30
			1.45923	0.93838	0.938423				1.45923	0.00435	0				1.45923	30	30
			1.46023	0.93838	0.938423				1.46023	0.00417	0				1.46023	30	30
			1.46123	0.93838	0.938423				1.46123	0.00399	0				1.46123	30	30
			1.46223	0.93838	0.938423				1.46223	0.00381	0				1.46223	30	30
			1.46323	0.93839	0.938423				1.46323	0.00363	0				1.46323	30	30
			1.46423	0.93839	0.938423				1.46423	0.00346	0				1.46423	30	30
			1.46523	0.93839	0.938423				1.46523	0.00328	0				1.46523	30	30
			1.46623	0.93839	0.938423				1.46623	0.00311	0				1.46623	30	30
			1.46723	0.93839	0.938423				1.46723	0.00293	0				1.46723	30	30
			1.46823	0.9384	0.938423				1.46823	0.00276	0				1.46823	30	30
			1.46923	0.9384	0.938423				1.46923	0.00259	0				1.46923	30	30
			1.47023	0.9384	0.938423				1.47023	0.00243	0				1.47023	30	30
			1.47123	0.9384	0.938423				1.47123	0.00226	0				1.47123	30	30
			1.47223	0.9384	0.938423				1.47223	0.00209	0				1.47223	30	30
			1.47323	0.93841	0.938423				1.47323	0.00193	0				1.47323	30	30
			1.47423	0.93841	0.938423				1.47423	0.00177	0				1.47423	30	30
			1.47523	0.93841	0.938423				1.47523	0.0016	0				1.47523	30	30
			1.47623	0.93841	0.938423				1.47623	0.00144	0				1.47623	30	30
			1.47723	0.93841	0.938423				1.47723	0.00128	0				1.47723	30	30
			1.47823	0.93841	0.938423				1.47823	0.00113	0				1.47823	30	30
			1.47923	0.93842	0.938423				1.47923	0.000972124	0				1.47923	30	30
			1.48023	0.93842	0.938423				1.48023	0.000817753	0				1.48023	30	30
			1.48123	0.93842	0.938423				1.48123	0.000664061	0				1.48123	30	30
			1.48223	0.93842	0.938423				1.48223	0.000511281	0				1.48223	30	30
			1.48323	0.93842	0.938423				1.48323	0.000359079	0				1.48323	30	30
			1.48423	0.93842	0.938423				1.48423	0.000207443	0				1.48423	30.0001	30
			1.48523	0.93843	0.938423				1.48523	5.66478e-05	0				1.48523	30.0001	30
			1.48623	0.93843	0.938423				1.48623	-9.33771e-05	0				1.48623	30.0001	30
			1.48723	0.93843	0.938423				1.48723	-0.000241094	0				1.48723	30.0001	30
			1.48823	0.93843	0.938423				1.48823	-0.000386337	0				1.48823	30.0001	30
			1.48923	0.93843	0.938423				1.48923	-0.00052964	0				1.48923	30.0001	30
			1.49023	0.93843	0.938423				1.49023	-0.00067227	0				1.49023	30.0001	30
			1.49123	0.93844	0.938423				1.49123	-0.000814273	0				1.49123	30.0001	30
			1.49223	0.93844	0.938423				1.49223	-0.000955433	0				1.49223	30.0001	30
			1.49323	0.93844	0.938423				1.49323	-0.0011	0				1.49323	30.0001	30
			1.49423	0.93844	0.938423				1.49423	-0.00124	0				1.49423	30.0001	30
			1.49523	0.93844	0.938423				1.49523	-0.00138	0				1.49523	30.0001	30
			1.49623	0.93844	0.938423				1.49623	-0.00151	0				1.49623	30.0001	30
			1.49723	0.93845	0.938423				1.49723	-0.00165	0				1.49723	30.0001	30
			1.49823	0.93845	0.938423				1.49823	-0.00178	0				1.49823	30.0001	30
			1.49923	0.93845	0.938423				1.49923	-0.00192	0				1.49923	30.0001	30
			1.50023	0.93845	0.938423				1.50023	-0.00205	0				1.50023	30.0001	30
			1.50123	0.93845	0.938423				1.50123	-0.00218	0				1.50123	30.0001	30
			1.50223	0.93845	0.938423				1.50223	-0.00231	0				1.50223	30.0001	30
			1.50323	0.93845	0.938423				1.50323	-0.00244	0				1.50323	30.0001	30
			1.50423	0.93846	0.938423				1.50423	-0.00257	0				1.50423	30.0001	30
			1.50501	0.93846	0.938423				1.50501	-0.00267	0				1.50501	30.0001	30
			1.50579	0.93849	0.938423				1.50579	-0.00577	0				1.50579	29.9997	30
			1.50679	0.9385	0.938423				1.50679	-0.00596	0				1.50679	29.9997	30
			1.50779	0.9385	0.938423				1.50779	-0.0062	0				1.50779	29.9998	30
			1.50879	0.9385	0.938423				1.50879	-0.00642	0				1.50879	29.9998	30
			1.50979	0.9385	0.938423				1.50979	-0.00665	0				1.50979	29.9998	30
			1.51079	0.93851	0.938423				1.51079	-0.00687	0				1.51079	29.9998	30
			1.51179	0.93851	0.938423				1.51179	-0.0071	0				1.51179	29.9998	30
			1.51279	0.93851	0.938423				1.51279	-0.00732	0				1.51279	29.9998	30
			1.51379	0.93851	0.938423				1.51379	-0.00754	0				1.51379	29.9998	30
			1.51479	0.93852	0.938423				1.51479	-0.00775	0				1.51479	29.9998	30
			1.51579	0.93852	0.938423				1.51579	-0.00797	0				1.51579	29.9998	30
			1.51679	0.93852	0.938423				1.51679	-0.00819	0				1.51679	29.9998	30
			1.51779	0.93852	0.938423				1.51779	-0.0084	0				1.51779	29.9998	30
			1.51879	0.93853	0.938423				1.51879	-0.00861	0				1.51879	29.9998	30
			1.51979	0.93853	0.938423				1.51979	-0.00882	0				1.51979	29.9998	30
			1.52079	0.93853	0.938423				1.52079	-0.00902	0				1.52079	29.9998	30
			1.52179	0.93853	0.938423				1.52179	-0.00923	0				1.52179	29.9998	30
			1.52279	0.93854	0.938423				1.52279	-0.00943	0				1.52279	29.9998	30
			1.52379	0.93854	0.938423				1.52379	-0.00964	0				1.52379	29.9998	30
			1.52479	0.93854	0.938423				1.52479	-0.00984	0				1.52479	29.9998	30
			1.52579	0.93854	0.938423				1.52579	-0.01004	0				1.52579	29.9998	30
			1.52679	0.93854	0.938423				1.52679	-0.01024	0				1.52679	29.9998	30
			1.52779	0.93855	0.938423				1.52779	-0.01043	0				1.52779	29.9998	30
			1.52879	0.93855	0.938423				1.52879	-0.01062	0				1.52879	29.9998	30
			1.52979	0.93855	0.938423				1.52979	-0.01081	0				1.52979	29.9999	30
			1.53079	0.93855	0.938423				1.53079	-0.011	0				1.53079	29.9999	30
			1.53179	0.93856	0.938423				1.53179	-0.01119	0				1.53179	29.9999	30
			1.53279	0.93856	0.938423				1.53279	-0.01139	0				1.53279	29.9999	30
			1.53379	0.93856	0.938423				1.53379	-0.01157	0				1.53379	29.9999	30
			1.53479	0.93856	0.938423				1.53479	-0.01176	0				1.53479	29.9999	30
			1.53579	0.93856	0.938423				1.53579	-0.01195	0				1.53579	29.9999	30
			1.53679	0.93857	0.938423				1.53679	-0.01213	0				1.53679	29.9999	30
			1.53779	0.93857	0.938423				1.53779	-0.01231	0				1.53779	29.9999	30
			1.53879	0.93857	0.938423				1.53879	-0.01249	0				1.53879	29.9999	30
			1.53979	0.93857	0.938423				1.53979	-0.01266	0				1.53979	29.9999	30
			1.54079	0.93857	0.938423				1.54079	-0.01284	0				1.54079	29.9999	30
			1.54179	0.93858	0.938423				1.54179	-0.01302	0				1.54179	29.9999	30
			1.54279	0.93858	0.938423				1.54279	-0.01319	0				1.54279	29.9999	30
			1.54379	0.93858	0.938423				1.54379	-0.01337	0				1.54379	29.9999	30
			1.54479	0.93858	0.938423				1.54479	-0.01354	0				1.54479	29.9999	30
			1.54579	0.93858	0.938423				1.54579	-0.01371	0				1.54579	29.9999	30
			1.54679	0.93859	0.938423				1.54679	-0.01388	0				1.54679	29.9999	30
			1.54779	0.93859	0.938423				1.54779	-0.01405	0				1.54779	29.9999	30
			1.54879	0.93859	0.938423				1.54879	-0.01421	0				1.54879	29.9999	30
			1.54979	0.93859	0.938423				1.54979	-0.01438	0				1.54979	29.9999	30
			1.55079	0.93859	0.938423				1.55079	-0.01454	0				1.55079	29.9999	30
			1.55179	0.9386	0.938423				1.55179	-0.0147	0				1.55179	29.9999	30
			1.55279	0.9386	0.938423				1.55279	-0.01486	0				1.55279	29.9999	30
			1.55357	0.9386	0.938423				1.55357	-0.01499	0				1.55357	29.9999	30
			1.55435	0.93866	0.938423				1.55435	-0.01841	0				1.55435	29.9987	30
			1.55535	0.93867	0.938423				1.55535	-0.01868	0				1.55535	29.9987	30
			1.55635	0.93867	0.938423				1.55635	-0.01904	0				1.55635	29.9987	30
			1.55735	0.93867	0.938423				1.55735	-0.01939	0				1.55735	29.9987	30
			1.55835	0.93868	0.938423				1.55835	-0.01974	0				1.55835	29.9987	30
			1.55935	0.93868	0.938423				1.55935	-0.02008	0				1.55935	29.9988	30
			1.56035	0.93869	0.938423				1.56035	-0.02042	0				1.56035	29.9988	30
			1.56135	0.93869	0.938423				1.56135	-0.02076	0				1.56135	29.9988	30
			1.56235	0.93869	0.938423				1.56235	-0.0211	0				1.56235	29.9988	30
			1.56335	0.9387	0.938423				1.56335	-0.02143	0				1.56335	29.9988	30
			1.56435	0.9387	0.938423				1.56435	-0.02176	0				1.56435	29.9988	30
			1.56535	0.93871	0.938423				1.56535	-0.0221	0				1.56535	29.9988	30
			1.56635	0.93871	0.938423				1.56635	-0.02242	0				1.56635	29.9988	30
			1.56735	0.93871	0.938423				1.56735	-0.02274	0				1.56735	29.9988	30
			1.56835	0.93872	0.938423				1.56835	-0.02306	0				1.56835	29.9988	30
			1.56935	0.93872	0.938423				1.56935	-0.02338	0				1.56935	29.9988	30
			1.57035	0.93872	0.938423				1.57035	-0.02369	0				1.57035	29.9988	30
			1.57135	0.93873	0.938423				1.57135	-0.024	0				1.57135	29.9988	30
			1.57235	0.93873	0.938423				1.57235	-0.02432	0				1.57235	29.9988	30
			1.57335	0.93874	0.938423				1.57335	-0.02463	0				1.57335	29.9989	30
			1.57435	0.93874	0.938423				1.57435	-0.02493	0				1.57435	29.9989	30
			1.57535	0.93874	0.938423				1.57535	-0.02523	0				1.57535	29.9989	30
			1.57635	0.93875	0.938423				1.57635	-0.02553	0				1.57635	29.9989	30
			1.57735	0.93875	0.938423				1.57735	-0.02582	0				1.57735	29.9989	30
			1.57835	0.93875	0.938423				1.57835	-0.02611	0				1.57835	29.9989	30
			1.57935	0.93876	0.938423				1.57935	-0.02641	0				1.57935	29.9989	30
			1.58035	0.93876	0.938423				1.58035	-0.0267	0				1.58035	29.9989	30
			1.58135	0.93876	0.938423				1.58135	-0.02699	0				1.58135	29.9989	30
			1.58235	0.93877	0.938423				1.58235	-0.02728	0				1.58235	29.9989	30
			1.58335	0.93877	0.938423				1.58335	-0.02757	0				1.58335	29.9989	30
			1.58435	0.93877	0.938423				1.58435	-0.02786	0				1.58435	29.9989	30
			1.58535	0.93878	0.938423				1.58535	-0.02813	0				1.58535	29.9989	30
			1.58635	0.93878	0.938423				1.58635	-0.02841	0				1.58635	29.9989	30
			1.58735	0.93878	0.938423				1.58735	-0.02868	0				1.58735	29.9989	30
			1.58835	0.93879	0.938423				1.58835	-0.02895	0				1.58835	29.999	30
			1.58935	0.93879	0.938423				1.58935	-0.02922	0				1.58935	29.999	30
			1.59035	0.93879	0.938423				1.59035	-0.02949	0				1.59035	29.999	30
			1.59135	0.9388	0.938423				1.59135	-0.02976	0				1.59135	29.999	30
			1.59235	0.9388	0.938423				1.59235	-0.03003	0				1.59235	29.999	30
			1.59335	0.9388	0.938423				1.59335	-0.0303	0				1.59335	29.999	30
			1.59435	0.9388	0.938423				1.59435	-0.03056	0				1.59435	29.999	30
			1.59535	0.93881	0.938423				1.59535	-0.03082	0				1.59535	29.999	30
			1.59635	0.93881	0.938423				1.59635	-0.03107	0				1.59635	29.999	30
			1.59735	0.93881	0.938423				1.59735	-0.03132	0				1.59735	29.999	30
			1.59835	0.93882	0.938423				1.59835	-0.03157	0				1.59835	29.999	30
			1.59935	0.93882	0.938423				1.59935	-0.03182	0				1.59935	29.999	30
			1.60035	0.93882	0.938423				1.60035	-0.03207	0				1.60035	29.999	30
			1.60135	0.93882	0.938423				1.60135	-0.03232	0				1.60135	29.999	30
			1.60213	0.93883	0.938423				1.60213	-0.03251	0				1.60213	29.999	30
			1.6029	0.9388	0.938423				1.6029	-0.02852	0				1.6029	29.9961	30
			1.6039	0.9388	0.938423				1.6039	-0.02896	0				1.6039	29.9961	30
			1.6049	0.93881	0.938423				1.6049	-0.02957	0				1.6049	29.9961	30
			1.6059	0.93882	0.938423				1.6059	-0.03016	0				1.6059	29.9962	30
			1.6069	0.93882	0.938423				1.6069	-0.03074	0				1.6069	29.9962	30
			1.6079	0.93883	0.938423				1.6079	-0.03131	0				1.6079	29.9962	30
			1.6089	0.93884	0.938423				1.6089	-0.03189	0				1.6089	29.9962	30
			1.6099	0.93884	0.938423				1.6099	-0.03246	0				1.6099	29.9962	30
			1.6109	0.93885	0.938423				1.6109	-0.03302	0				1.6109	29.9962	30
			1.6119	0.93886	0.938423				1.6119	-0.03359	0				1.6119	29.9962	30
			1.6129	0.93887	0.938423				1.6129	-0.03415	0				1.6129	29.9962	30
			1.6139	0.93887	0.938423				1.6139	-0.03471	0				1.6139	29.9962	30
			1.6149	0.93888	0.938423				1.6149	-0.03525	0				1.6149	29.9963	30
			1.6159	0.93889	0.938423				1.6159	-0.03579	0				1.6159	29.9963	30
			1.6169	0.93889	0.938423				1.6169	-0.03633	0				1.6169	29.9963	30
			1.6179	0.9389	0.938423				1.6179	-0.03686	0				1.6179	29.9963	30
			1.6189	0.9389	0.938423				1.6189	-0.03739	0				1.6189	29.9963	30
			1.6199	0.93891	0.938423				1.6199	-0.03791	0				1.6199	29.9963	30
			1.6209	0.93892	0.938423				1.6209	-0.03844	0				1.6209	29.9963	30
			1.6219	0.93892	0.938423				1.6219	-0.03896	0				1.6219	29.9963	30
			1.6229	0.93893	0.938423				1.6229	-0.03947	0				1.6229	29.9964	30
			1.6239	0.93894	0.938423				1.6239	-0.03998	0				1.6239	29.9964	30
			1.6249	0.93894	0.938423				1.6249	-0.04047	0				1.6249	29.9964	30
			1.6259	0.93895	0.938423				1.6259	-0.04097	0				1.6259	29.9964	30
			1.6269	0.93895	0.938423				1.6269	-0.04146	0				1.6269	29.9964	30
			1.6279	0.93896	0.938423				1.6279	-0.04195	0				1.6279	29.9964	30
			1.6289	0.93897	0.938423				1.6289	-0.04244	0				1.6289	29.9964	30
			1.6299	0.93897	0.938423				1.6299	-0.04293	0				1.6299	29.9964	30
			1.6309	0.93898	0.938423				1.6309	-0.04342	0				1.6309	29.9964	30
			1.6319	0.93898	0.938423				1.6319	-0.04391	0				1.6319	29.9965	30
			1.6329	0.93899	0.938423				1.6329	-0.04439	0				1.6329	29.9965	30
			1.6339	0.939	0.938423				1.6339	-0.04486	0				1.6339	29.9965	30
			1.6349	0.939	0.938423				1.6349	-0.04531	0				1.6349	29.9965	30
			1.6359	0.93901	0.938423				1.6359	-0.04577	0				1.6359	29.9965	30
			1.6369	0.93901	0.938423				1.6369	-0.04623	0				1.6369	29.9965	30
			1.6379	0.93902	0.938423				1.6379	-0.04668	0				1.6379	29.9965	30
			1.6389	0.93902	0.938423				1.6389	-0.04713	0				1.6389	29.9965	30
			1.6399	0.93903	0.938423				1.6399	-0.04758	0				1.6399	29.9965	30
			1.6409	0.93903	0.938423				1.6409	-0.04804	0				1.6409	29.9966	30
			1.6419	0.93904	0.938423				1.6419	-0.04849	0				1.6419	29.9966	30
			1.6429	0.93905	0.938423				1.6429	-0.04893	0				1.6429	29.9966	30
			1.6439	0.93905	0.938423				1.6439	-0.04936	0				1.6439	29.9966	30
			1.6449	0.93906	0.938423				1.6449	-0.04979	0				1.6449	29.9966	30
			1.6459	0.93906	0.938423				1.6459	-0.05021	0				1.6459	29.9966	30
			1.6469	0.93907	0.938423				1.6469	-0.05063	0				1.6469	29.9966	30
			1.6479	0.93907	0.938423				1.6479	-0.05105	0				1.6479	29.9966	30
			1.6489	0.93908	0.938423				1.6489	-0.05146	0				1.6489	29.9966	30
			1.6499	0.93908	0.938423				1.6499	-0.05188	0				1.6499	29.9966	30
			1.65068	0.93908	0.938423				1.65068	-0.05221	0				1.65068	29.9966	30
			1.65146	0.93894	0.938423				1.65146	-0.03805	0				1.65146	29.9911	30
			1.65246	0.93895	0.938423				1.65246	-0.03878	0				1.65246	29.9911	30
			1.65346	0.93896	0.938423				1.65346	-0.03979	0				1.65346	29.9911	30
			1.65446	0.93898	0.938423				1.65446	-0.04075	0				1.65446	29.9912	30
			1.65546	0.93899	0.938423				1.65546	-0.04171	0				1.65546	29.9912	30
			1.65646	0.939	0.938423				1.65646	-0.04266	0				1.65646	29.9912	30
			1.65746	0.93901	0.938423				1.65746	-0.04361	0				1.65746	29.9912	30
			1.65846	0.93902	0.938423				1.65846	-0.04455	0				1.65846	29.9913	30
			1.65946	0.93904	0.938423				1.65946	-0.04548	0				1.65946	29.9913	30
			1.66046	0.93905	0.938423				1.66046	-0.04641	0				1.66046	29.9913	30
			1.66146	0.93906	0.938423				1.66146	-0.04734	0				1.66146	29.9913	30
			1.66246	0.93907	0.938423				1.66246	-0.04826	0				1.66246	29.9913	30
			1.66346	0.93908	0.938423				1.66346	-0.04915	0				1.66346	29.9914	30
			1.66446	0.93909	0.938423				1.66446	-0.05005	0				1.66446	29.9914	30
			1.66546	0.9391	0.938423				1.66546	-0.05093	0				1.66546	29.9914	30
			1.66646	0.93912	0.938423				1.66646	-0.05181	0				1.66646	29.9914	30
			1.66746	0.93913	0.938423				1.66746	-0.05268	0				1.66746	29.9915	30
			1.66846	0.93914	0.938423				1.66846	-0.05354	0				1.66846	29.9915	30
			1.66946	0.93915	0.938423				1.66946	-0.05441	0				1.66946	29.9915	30
			1.67046	0.93916	0.938423				1.67046	-0.05527	0				1.67046	29.9915	30
			1.67146	0.93917	0.938423				1.67146	-0.05611	0				1.67146	29.9915	30
			1.67246	0.93918	0.938423				1.67246	-0.05695	0				1.67246	29.9916	30
			1.67346	0.93919	0.938423				1.67346	-0.05776	0				1.67346	29.9916	30
			1.67446	0.9392	0.938423				1.67446	-0.05858	0				1.67446	29.9916	30
			1.67546	0.93921	0.938423				1.67546	-0.05939	0				1.67546	29.9916	30
			1.67646	0.93922	0.938423				1.67646	-0.0602	0				1.67646	29.9916	30
			1.67746	0.93923	0.938423				1.67746	-0.06101	0				1.67746	29.9916	30
			1.67846	0.93924	0.938423				1.67846	-0.06182	0				1.67846	29.9917	30
			1.67946	0.93925	0.938423				1.67946	-0.06262	0				1.67946	29.9917	30
			1.68046	0.93926	0.938423				1.68046	-0.06343	0				1.68046	29.9917	30
			1.68146	0.93927	0.938423				1.68146	-0.06422	0				1.68146	29.9917	30
			1.68246	0.93928	0.938423				1.68246	-0.06499	0				1.68246	29.9917	30
			1.68346	0.93929	0.938423				1.68346	-0.06575	0				1.68346	29.9918	30
			1.68446	0.9393	0.938423				1.68446	-0.0665	0				1.68446	29.9918	30
			1.68546	0.93931	0.938423				1.68546	-0.06725	0				1.68546	29.9918	30
			1.68646	0.93932	0.938423				1.68646	-0.06799	0				1.68646	29.9918	30
			1.68746	0.93933	0.938423				1.68746	-0.06874	0				1.68746	29.9918	30
			1.68846	0.93934	0.938423				1.68846	-0.06949	0				1.68846	29.9918	30
			1.68946	0.93935	0.938423				1.68946	-0.07023	0				1.68946	29.9919	30
			1.69046	0.93936	0.938423				1.69046	-0.07098	0				1.69046	29.9919	30
			1.69146	0.93937	0.938423				1.69146	-0.07171	0				1.69146	29.9919	30
			1.69246	0.93937	0.938423				1.69246	-0.07242	0				1.69246	29.9919	30
			1.69346	0.93938	0.938423				1.69346	-0.07312	0				1.69346	29.9919	30
			1.69446	0.93939	0.938423				1.69446	-0.07381	0				1.69446	29.9919	30
			1.69546	0.9394	0.938423				1.69546	-0.0745	0				1.69546	29.992	30
			1.69646	0.93941	0.938423				1.69646	-0.07519	0				1.69646	29.992	30
			1.69746	0.93942	0.938423				1.69746	-0.07588	0				1.69746	29.992	30
			1.69846	0.93943	0.938423				1.69846	-0.07657	0				1.69846	29.992	30
			1.69924	0.93943	0.938423				1.69924	-0.07711	0				1.69924	29.992	30
			1.70002	0.93925	0.938423				1.70002	-0.05214	0				1.70002	29.9821	30
			1.70102	0.93927	0.938423				1.70102	-0.05332	0				1.70102	29.9821	30
			1.70202	0.93929	0.938423				1.70202	-0.05491	0				1.70202	29.9822	30
			1.70302	0.93931	0.938423				1.70302	-0.05645	0				1.70302	29.9822	30
			1.70402	0.93933	0.938423				1.70402	-0.05796	0				1.70402	29.9822	30
			1.70502	0.93935	0.938423				1.70502	-0.05947	0				1.70502	29.9823	30
			1.70602	0.93937	0.938423				1.70602	-0.06097	0				1.70602	29.9823	30
			1.70702	0.93939	0.938423				1.70702	-0.06246	0				1.70702	29.9823	30
			1.70802	0.93941	0.938423				1.70802	-0.06394	0				1.70802	29.9824	30
			1.70902	0.93943	0.938423				1.70902	-0.06541	0				1.70902	29.9824	30
			1.71002	0.93945	0.938423				1.71002	-0.06688	0				1.71002	29.9824	30
			1.71102	0.93947	0.938423				1.71102	-0.06834	0				1.71102	29.9825	30
			1.71202	0.93948	0.938423				1.71202	-0.06977	0				1.71202	29.9825	30
			1.71302	0.9395	0.938423				1.71302	-0.07118	0				1.71302	29.9825	30
			1.71402	0.93952	0.938423				1.71402	-0.07258	0				1.71402	29.9826	30
			1.71502	0.93954	0.938423				1.71502	-0.07397	0				1.71502	29.9826	30
			1.71602	0.93956	0.938423				1.71602	-0.07535	0				1.71602	29.9826	30
			1.71702	0.93958	0.938423				1.71702	-0.07673	0				1.71702	29.9827	30
			1.71802	0.93959	0.938423				1.71802	-0.0781	0				1.71802	29.9827	30
			1.71902	0.93961	0.938423				1.71902	-0.07946	0				1.71902	29.9827	30
			1.72002	0.93963	0.938423				1.72002	-0.0808	0				1.72002	29.9828	30
			1.72102	0.93965	0.938423				1.72102	-0.08212	0				1.72102	29.9828	30
			1.72202	0.93966	0.938423				1.72202	-0.08342	0				1.72202	29.9828	30
			1.72302	0.93968	0.938423				1.72302	-0.08471	0				1.72302	29.9829	30
			1.72402	0.9397	0.938423				1.72402	-0.086	0				1.72402	29.9829	30
			1.72502	0.93971	0.938423				1.72502	-0.08728	0				1.72502	29.9829	30
			1.72602	0.93973	0.938423				1.72602	-0.08856	0				1.72602	29.983	30
			1.72702	0.93975	0.938423				1.72702	-0.08984	0				1.72702	29.983	30
			1.72802	0.93976	0.938423				1.72802	-0.09112	0				1.72802	29.983	30
			1.72902	0.93978	0.938423				1.72902	-0.0924	0				1.72902	29.9831	30
			1.73002	0.9398	0.938423				1.73002	-0.09365	0				1.73002	29.9831	30
			1.73102	0.93981	0.938423				1.73102	-0.09488	0				1.73102	29.9831	30
			1.73202	0.93983	0.938423				1.73202	-0.09607	0				1.73202	29.9832	30
			1.73302	0.93984	0.938423				1.73302	-0.09727	0				1.73302	29.9832	30
			1.73402	0.93986	0.938423				1.73402	-0.09845	0				1.73402	29.9832	30
			1.73502	0.93987	0.938423				1.73502	-0.09964	0				1.73502	29.9833	30
			1.73602	0.93989	0.938423				1.73602	-0.10082	0				1.73602	29.9833	30
			1.73702	0.9399	0.938423				1.73702	-0.102	0				1.73702	29.9833	30
			1.73802	0.93992	0.938423				1.73802	-0.10318	0				1.73802	29.9833	30
			1.73902	0.93994	0.938423				1.73902	-0.10437	0				1.73902	29.9834	30
			1.74002	0.93995	0.938423				1.74002	-0.10552	0				1.74002	29.9834	30
			1.74102	0.93997	0.938423				1.74102	-0.10665	0				1.74102	29.9834	30
			1.74202	0.93998	0.938423				1.74202	-0.10775	0				1.74202	29.9834	30
			1.74302	0.93999	0.938423				1.74302	-0.10885	0				1.74302	29.9835	30
			1.74402	0.94001	0.938423				1.74402	-0.10995	0				1.74402	29.9835	30
			1.74502	0.94002	0.938423				1.74502	-0.11104	0				1.74502	29.9835	30
			1.74602	0.94004	0.938423				1.74602	-0.11213	0				1.74602	29.9836	30
			1.74702	0.94005	0.938423				1.74702	-0.11322	0				1.74702	29.9836	30
			1.7478	0.94006	0.938423				1.7478	-0.11407	0				1.7478	29.9836	30
			1.74858	0.93878	0.938423				1.74858	-0.03326	0				1.74858	29.9708	30
			1.74958	0.9388	0.938423				1.74958	-0.03509	0				1.74958	29.9708	30
			1.75058	0.93884	0.938423				1.75058	-0.03755	0				1.75058	29.9709	30
			1.75158	0.93887	0.938423				1.75158	-0.03992	0				1.75158	29.971	30
			1.75258	0.9389	0.938423				1.75258	-0.04226	0				1.75258	29.971	30
			1.75358	0.93893	0.938423				1.75358	-0.04458	0				1.75358	29.9711	30
			1.75458	0.93896	0.938423				1.75458	-0.04689	0				1.75458	29.9712	30
			1.75558	0.939	0.938423				1.75558	-0.04919	0				1.75558	29.9712	30
			1.75658	0.93903	0.938423				1.75658	-0.05147	0				1.75658	29.9713	30
			1.75758	0.93906	0.938423				1.75758	-0.05375	0				1.75758	29.9713	30
			1.75858	0.93909	0.938423				1.75858	-0.05602	0				1.75858	29.9714	30
			1.75958	0.93912	0.938423				1.75958	-0.05827	0				1.75958	29.9715	30
			1.76058	0.93915	0.938423				1.76058	-0.06047	0				1.76058	29.9715	30
			1.76158	0.93918	0.938423				1.76158	-0.06265	0				1.76158	29.9716	30
			1.76258	0.93921	0.938423				1.76258	-0.06481	0				1.76258	29.9716	30
			1.76358	0.93924	0.938423				1.76358	-0.06695	0				1.76358	29.9717	30
			1.76458	0.93927	0.938423				1.76458	-0.06908	0				1.76458	29.9717	30
			1.76558	0.9393	0.938423				1.76558	-0.0712	0				1.76558	29.9718	30
			1.76658	0.93933	0.938423				1.76658	-0.07331	0				1.76658	29.9718	30
			1.76758	0.93936	0.938423				1.76758	-0.07541	0				1.76758	29.9719	30
			1.76858	0.93939	0.938423				1.76858	-0.07748	0				1.76858	29.9719	30
			1.76958	0.93941	0.938423				1.76958	-0.07952	0				1.76958	29.972	30
			1.77058	0.93944	0.938423				1.77058	-0.08153	0				1.77058	29.972	30
			1.77158	0.93947	0.938423				1.77158	-0.08352	0				1.77158	29.9721	30
			1.77258	0.9395	0.938423				1.77258	-0.0855	0				1.77258	29.9721	30
			1.77358	0.93952	0.938423				1.77358	-0.08748	0				1.77358	29.9722	30
			1.77458	0.93955	0.938423				1.77458	-0.08945	0				1.77458	29.9723	30
			1.77558	0.93958	0.938423				1.77558	-0.09143	0				1.77558	29.9723	30
			1.77658	0.9396	0.938423				1.77658	-0.0934	0				1.77658	29.9724	30
			1.77758	0.93963	0.938423				1.77758	-0.09538	0				1.77758	29.9724	30
			1.77858	0.93966	0.938423				1.77858	-0.09731	0				1.77858	29.9725	30
			1.77958	0.93968	0.938423				1.77958	-0.09919	0				1.77958	29.9725	30
			1.78058	0.93971	0.938423				1.78058	-0.10104	0				1.78058	29.9726	30
			1.78158	0.93973	0.938423				1.78158	-0.10288	0				1.78158	29.9726	30
			1.78258	0.93976	0.938423				1.78258	-0.10471	0				1.78258	29.9727	30
			1.78358	0.93978	0.938423				1.78358	-0.10653	0				1.78358	29.9727	30
			1.78458	0.93981	0.938423				1.78458	-0.10835	0				1.78458	29.9727	30
			1.78558	0.93983	0.938423				1.78558	-0.11018	0				1.78558	29.9728	30
			1.78658	0.93986	0.938423				1.78658	-0.112	0				1.78658	29.9728	30
			1.78758	0.93988	0.938423				1.78758	-0.11382	0				1.78758	29.9729	30
			1.78858	0.93991	0.938423				1.78858	-0.1156	0				1.78858	29.9729	30
			1.78958	0.93993	0.938423				1.78958	-0.11734	0				1.78958	29.973	30
			1.79058	0.93995	0.938423				1.79058	-0.11904	0				1.79058	29.973	30
			1.79158	0.93998	0.938423				1.79158	-0.12074	0				1.79158	29.9731	30
			1.79258	0.94	0.938423				1.79258	-0.12243	0				1.79258	29.9731	30
			1.79358	0.94002	0.938423				1.79358	-0.12411	0				1.79358	29.9732	30
			1.79458	0.94005	0.938423				1.79458	-0.12579	0				1.79458	29.9732	30
			1.79558	0.94007	0.938423				1.79558	-0.12747	0				1.79558	29.9732	30
			1.79636	0.94009	0.938423				1.79636	-0.12878	0				1.79636	29.9733	30
			1.79713	0.93937	0.938423				1.79713	-0.05623	0				1.79713	29.9508	30
			1.79813	0.9394	0.938423				1.79813	-0.05887	0				1.79813	29.9509	30
			1.79913	0.93945	0.938423				1.79913	-0.06232	0				1.79913	29.951	30
			1.80013	0.9395	0.938423				1.80013	-0.06565	0				1.80013	29.9511	30
			1.80113	0.93954	0.938423				1.80113	-0.06894	0				1.80113	29.9511	30
			1.80213	0.93959	0.938423				1.80213	-0.07221	0				1.80213	29.9512	30
			1.80313	0.93963	0.938423				1.80313	-0.07546	0				1.80313	29.9513	30
			1.80413	0.93968	0.938423				1.80413	-0.07869	0				1.80413	29.9514	30
			1.80513	0.93972	0.938423				1.80513	-0.08191	0				1.80513	29.9515	30
			1.80613	0.93977	0.938423				1.80613	-0.08511	0				1.80613	29.9516	30
			1.80713	0.93981	0.938423				1.80713	-0.0883	0				1.80713	29.9517	30
			1.80813	0.93986	0.938423				1.80813	-0.09147	0				1.80813	29.9517	30
			1.80913	0.9399	0.938423				1.80913	-0.09457	0				1.80913	29.9518	30
			1.81013	0.93994	0.938423				1.81013	-0.09763	0				1.81013	29.9519	30
			1.81113	0.93998	0.938423				1.81113	-0.10067	0				1.81113	29.952	30
			1.81213	0.94003	0.938423				1.81213	-0.10368	0				1.81213	29.9521	30
			1.81313	0.94007	0.938423				1.81313	-0.10668	0				1.81313	29.9521	30
			1.81413	0.94011	0.938423				1.81413	-0.10966	0				1.81413	29.9522	30
			1.81513	0.94015	0.938423				1.81513	-0.11263	0				1.81513	29.9523	30
			1.81613	0.94019	0.938423				1.81613	-0.11558	0				1.81613	29.9524	30
			1.81713	0.94023	0.938423				1.81713	-0.1185	0				1.81713	29.9524	30
			1.81813	0.94027	0.938423				1.81813	-0.12138	0				1.81813	29.9525	30
			1.81913	0.94031	0.938423				1.81913	-0.1242	0				1.81913	29.9526	30
			1.82013	0.94035	0.938423				1.82013	-0.127	0				1.82013	29.9527	30
			1.82113	0.94039	0.938423				1.82113	-0.12979	0				1.82113	29.9527	30
			1.82213	0.94043	0.938423				1.82213	-0.13257	0				1.82213	29.9528	30
			1.82313	0.94046	0.938423				1.82313	-0.13535	0				1.82313	29.9529	30
			1.82413	0.9405	0.938423				1.82413	-0.13812	0				1.82413	29.953	30
			1.82513	0.94054	0.938423				1.82513	-0.1409	0				1.82513	29.953	30
			1.82613	0.94058	0.938423				1.82613	-0.14367	0				1.82613	29.9531	30
			1.82713	0.94062	0.938423				1.82713	-0.14639	0				1.82713	29.9532	30
			1.82813	0.94065	0.938423				1.82813	-0.14904	0				1.82813	29.9532	30
			1.82913	0.94069	0.938423				1.82913	-0.15164	0				1.82913	29.9533	30
			1.83013	0.94072	0.938423				1.83013	-0.15423	0				1.83013	29.9534	30
			1.83113	0.94076	0.938423				1.83113	-0.1568	0				1.83113	29.9534	30
			1.83213	0.9408	0.938423				1.83213	-0.15937	0				1.83213	29.9535	30
			1.83313	0.94083	0.938423				1.83313	-0.16193	0				1.83313	29.9536	30
			1.83413	0.94087	0.938423				1.83413	-0.16449	0				1.83413	29.9536	30
			1.83513	0.9409	0.938423				1.83513	-0.16705	0				1.83513	29.9537	30
			1.83613	0.94094	0.938423				1.83613	-0.16961	0				1.83613	29.9538	30
			1.83713	0.94097	0.938423				1.83713	-0.17212	0				1.83713	29.9538	30
			1.83813	0.941	0.938423				1.83813	-0.17457	0				1.83813	29.9539	30
			1.83913	0.94104	0.938423				1.83913	-0.17697	0				1.83913	29.954	30
			1.84013	0.94107	0.938423				1.84013	-0.17935	0				1.84013	29.954	30
			1.84113	0.9411	0.938423				1.84113	-0.18173	0				1.84113	29.9541	30
			1.84213	0.94114	0.938423				1.84213	-0.1841	0				1.84213	29.9541	30
			1.84313	0.94117	0.938423				1.84313	-0.18646	0				1.84313	29.9542	30
			1.84413	0.9412	0.938423				1.84413	-0.18882	0				1.84413	29.9543	30
			1.84491	0.94123	0.938423				1.84491	-0.19066	0				1.84491	29.9543	30
			1.84569	0.93959	0.938423				1.84569	-0.06834	0				1.84569	29.9242	30
			1.84669	0.93965	0.938423				1.84669	-0.07203	0				1.84669	29.9243	30
			1.84769	0.93972	0.938423				1.84769	-0.07685	0				1.84769	29.9244	30
			1.84869	0.93978	0.938423				1.84869	-0.08149	0				1.84869	29.9245	30
			1.84969	0.93985	0.938423				1.84969	-0.08608	0				1.84969	29.9247	30
			1.85069	0.93991	0.938423				1.85069	-0.09063	0				1.85069	29.9248	30
			1.85169	0.93998	0.938423				1.85169	-0.09516	0				1.85169	29.9249	30
			1.85269	0.94004	0.938423				1.85269	-0.09966	0				1.85269	29.925	30
			1.85369	0.94011	0.938423				1.85369	-0.10414	0				1.85369	29.9252	30
			1.85469	0.94017	0.938423				1.85469	-0.10861	0				1.85469	29.9253	30
			1.85569	0.94024	0.938423				1.85569	-0.11305	0				1.85569	29.9254	30
			1.85669	0.9403	0.938423				1.85669	-0.11747	0				1.85669	29.9255	30
			1.85769	0.94036	0.938423				1.85769	-0.12179	0				1.85769	29.9256	30
			1.85869	0.94042	0.938423				1.85869	-0.12606	0				1.85869	29.9258	30
			1.85969	0.94048	0.938423				1.85969	-0.1303	0				1.85969	29.9259	30
			1.86069	0.94054	0.938423				1.86069	-0.13449	0				1.86069	29.926	30
			1.86169	0.9406	0.938423				1.86169	-0.13867	0				1.86169	29.9261	30
			1.86269	0.94066	0.938423				1.86269	-0.14283	0				1.86269	29.9262	30
			1.86369	0.94072	0.938423				1.86369	-0.14696	0				1.86369	29.9263	30
			1.86469	0.94078	0.938423				1.86469	-0.15108	0				1.86469	29.9264	30
			1.86569	0.94084	0.938423				1.86569	-0.15514	0				1.86569	29.9265	30
			1.86669	0.9409	0.938423				1.86669	-0.15915	0				1.86669	29.9266	30
			1.86769	0.94095	0.938423				1.86769	-0.16309	0				1.86769	29.9267	30
			1.86869	0.94101	0.938423				1.86869	-0.16699	0				1.86869	29.9269	30
			1.86969	0.94107	0.938423				1.86969	-0.17088	0				1.86969	29.927	30
			1.87069	0.94112	0.938423				1.87069	-0.17476	0				1.87069	29.9271	30
			1.87169	0.94118	0.938423				1.87169	-0.17863	0				1.87169	29.9272	30
			1.87269	0.94123	0.938423				1.87269	-0.18249	0				1.87269	29.9273	30
			1.87369	0.94129	0.938423				1.87369	-0.18636	0				1.87369	29.9274	30
			1.87469	0.94134	0.938423				1.87469	-0.19022	0				1.87469	29.9275	30
			1.87569	0.9414	0.938423				1.87569	-0.194	0				1.87569	29.9276	30
			1.87669	0.94145	0.938423				1.87669	-0.1977	0				1.87669	29.9277	30
			1.87769	0.9415	0.938423				1.87769	-0.20133	0				1.87769	29.9278	30
			1.87869	0.94155	0.938423				1.87869	-0.20494	0				1.87869	29.9279	30
			1.87969	0.9416	0.938423				1.87969	-0.20853	0				1.87969	29.928	30
			1.88069	0.94165	0.938423				1.88069	-0.2121	0				1.88069	29.9281	30
			1.88169	0.94171	0.938423				1.88169	-0.21567	0				1.88169	29.9282	30
			1.88269	0.94176	0.938423				1.88269	-0.21923	0				1.88269	29.9283	30
			1.88369	0.94181	0.938423				1.88369	-0.2228	0				1.88369	29.9283	30
			1.88469	0.94186	0.938423				1.88469	-0.22636	0				1.88469	29.9285	30
			1.88569	0.94191	0.938423				1.88569	-0.22985	0				1.88569	29.9285	30
			1.88669	0.94196	0.938423				1.88669	-0.23326	0				1.88669	29.9286	30
			1.88769	0.942	0.938423				1.88769	-0.23661	0				1.88769	29.9287	30
			1.88869	0.94205	0.938423				1.88869	-0.23994	0				1.88869	29.9288	30
			1.88969	0.9421	0.938423				1.88969	-0.24325	0				1.88969	29.9289	30
			1.89069	0.94215	0.938423				1.89069	-0.24655	0				1.89069	29.929	30
			1.89169	0.94219	0.938423				1.89169	-0.24984	0				1.89169	29.9291	30
			1.89269	0.94224	0.938423				1.89269	-0.25313	0				1.89269	29.9292	30
			1.89347	0.94228	0.938423				1.89347	-0.25569	0				1.89347	29.9292	30
			1.89425	0.94021	0.938423				1.89425	-0.10428	0				1.89425	29.888	30
			1.89525	0.94028	0.938423				1.89525	-0.10929	0				1.89525	29.8882	30
			1.89625	0.94038	0.938423				1.89625	-0.11575	0				1.89625	29.8884	30
			1.89725	0.94047	0.938423				1.89725	-0.12198	0				1.89725	29.8885	30
			1.89825	0.94056	0.938423				1.89825	-0.12814	0				1.89825	29.8887	30
			1.89925	0.94065	0.938423				1.89925	-0.13424	0				1.89925	29.8889	30
			1.90025	0.94074	0.938423				1.90025	-0.14031	0				1.90025	29.889	30
			1.90125	0.94083	0.938423				1.90125	-0.14635	0				1.90125	29.8892	30
			1.90225	0.94092	0.938423				1.90225	-0.15236	0				1.90225	29.8894	30
			1.90325	0.94101	0.938423				1.90325	-0.15835	0				1.90325	29.8895	30
			1.90425	0.9411	0.938423				1.90425	-0.16431	0				1.90425	29.8897	30
			1.90525	0.94118	0.938423				1.90525	-0.17024	0				1.90525	29.8899	30
			1.90625	0.94127	0.938423				1.90625	-0.17603	0				1.90625	29.89	30
			1.90725	0.94136	0.938423				1.90725	-0.18176	0				1.90725	29.8902	30
			1.90825	0.94144	0.938423				1.90825	-0.18744	0				1.90825	29.8904	30
			1.90925	0.94152	0.938423				1.90925	-0.19307	0				1.90925	29.8905	30
			1.91025	0.94161	0.938423				1.91025	-0.19867	0				1.91025	29.8907	30
			1.91125	0.94169	0.938423				1.91125	-0.20424	0				1.91125	29.8908	30
			1.91225	0.94177	0.938423				1.91225	-0.20979	0				1.91225	29.891	30
			1.91325	0.94185	0.938423				1.91325	-0.21531	0				1.91325	29.8911	30
			1.91425	0.94193	0.938423				1.91425	-0.22076	0				1.91425	29.8913	30
			1.91525	0.94201	0.938423				1.91525	-0.22614	0				1.91525	29.8914	30
			1.91625	0.94209	0.938423				1.91625	-0.23142	0				1.91625	29.8916	30
			1.91725	0.94217	0.938423				1.91725	-0.23666	0				1.91725	29.8917	30
			1.91825	0.94225	0.938423				1.91825	-0.24188	0				1.91825	29.8919	30
			1.91925	0.94232	0.938423				1.91925	-0.24707	0				1.91925	29.892	30
			1.92025	0.9424	0.938423				1.92025	-0.25226	0				1.92025	29.8922	30
			1.92125	0.94248	0.938423				1.92125	-0.25744	0				1.92125	29.8923	30
			1.92225	0.94255	0.938423				1.92225	-0.26262	0				1.92225	29.8924	30
			1.92325	0.94263	0.938423				1.92325	-0.26779	0				1.92325	29.8926	30
			1.92425	0.9427	0.938423				1.92425	-0.27287	0				1.92425	29.8927	30
			1.92525	0.94278	0.938423				1.92525	-0.27783	0				1.92525	29.8929	30
			1.92625	0.94285	0.938423				1.92625	-0.2827	0				1.92625	29.893	30
			1.92725	0.94292	0.938423				1.92725	-0.28754	0				1.92725	29.8931	30
			1.92825	0.94299	0.938423				1.92825	-0.29235	0				1.92825	29.8933	30
			1.92925	0.94306	0.938423				1.92925	-0.29714	0				1.92925	29.8934	30
			1.93025	0.94313	0.938423				1.93025	-0.30192	0				1.93025	29.8935	30
			1.93125	0.9432	0.938423				1.93125	-0.3067	0				1.93125	29.8937	30
			1.93225	0.94327	0.938423				1.93225	-0.31148	0				1.93225	29.8938	30
			1.93325	0.94334	0.938423				1.93325	-0.31625	0				1.93325	29.8939	30
			1.93425	0.94341	0.938423				1.93425	-0.32093	0				1.93425	29.8941	30
			1.93525	0.94348	0.938423				1.93525	-0.32551	0				1.93525	29.8942	30
			1.93625	0.94355	0.938423				1.93625	-0.33	0				1.93625	29.8943	30
			1.93725	0.94361	0.938423				1.93725	-0.33446	0				1.93725	29.8944	30
			1.93825	0.94368	0.938423				1.93825	-0.3389	0				1.93825	29.8945	30
			1.93925	0.94374	0.938423				1.93925	-0.34332	0				1.93925	29.8947	30
			1.94025	0.94381	0.938423				1.94025	-0.34773	0				1.94025	29.8948	30
			1.94125	0.94387	0.938423				1.94125	-0.35214	0				1.94125	29.8949	30
			1.94203	0.94392	0.938423				1.94203	-0.35557	0				1.94203	29.895	30
			1.94281	0.94082	0.938423				1.94281	-0.16561	0				1.94281	29.8458	30
			1.94381	0.94092	0.938423				1.94381	-0.1722	0				1.94381	29.846	30
			1.94481	0.94105	0.938423				1.94481	-0.18059	0				1.94481	29.8463	30
			1.94581	0.94118	0.938423				1.94581	-0.18866	0				1.94581	29.8465	30
			1.94681	0.9413	0.938423				1.94681	-0.19665	0				1.94681	29.8467	30
			1.94781	0.94142	0.938423				1.94781	-0.20456	0				1.94781	29.8469	30
			1.94881	0.94154	0.938423				1.94881	-0.21244	0				1.94881	29.8472	30
			1.94981	0.94166	0.938423				1.94981	-0.22027	0				1.94981	29.8474	30
			1.95081	0.94178	0.938423				1.95081	-0.22806	0				1.95081	29.8476	30
			1.95181	0.9419	0.938423				1.95181	-0.23583	0				1.95181	29.8479	30
			1.95281	0.94201	0.938423				1.95281	-0.24356	0				1.95281	29.8481	30
			1.95381	0.94213	0.938423				1.95381	-0.25125	0				1.95381	29.8483	30
			1.95481	0.94225	0.938423				1.95481	-0.25876	0				1.95481	29.8485	30
			1.95581	0.94236	0.938423				1.95581	-0.26619	0				1.95581	29.8487	30
			1.95681	0.94247	0.938423				1.95681	-0.27355	0				1.95681	29.8489	30
			1.95781	0.94258	0.938423				1.95781	-0.28086	0				1.95781	29.8491	30
			1.95881	0.94269	0.938423				1.95881	-0.28812	0				1.95881	29.8493	30
			1.95981	0.9428	0.938423				1.95981	-0.29534	0				1.95981	29.8496	30
			1.96081	0.94291	0.938423				1.96081	-0.30253	0				1.96081	29.8498	30
			1.96181	0.94302	0.938423				1.96181	-0.30969	0				1.96181	29.85	30
			1.96281	0.94313	0.938423				1.96281	-0.31676	0				1.96281	29.8502	30
			1.96381	0.94324	0.938423				1.96381	-0.32374	0				1.96381	29.8504	30
			1.96481	0.94334	0.938423				1.96481	-0.33059	0				1.96481	29.8506	30
			1.96581	0.94344	0.938423				1.96581	-0.33739	0				1.96581	29.8508	30
			1.96681	0.94355	0.938423				1.96681	-0.34416	0				1.96681	29.8509	30
			1.96781	0.94365	0.938423				1.96781	-0.35089	0				1.96781	29.8511	30
			1.96881	0.94375	0.938423				1.96881	-0.35762	0				1.96881	29.8513	30
			1.96981	0.94385	0.938423				1.96981	-0.36433	0				1.96981	29.8515	30
			1.97081	0.94396	0.938423				1.97081	-0.37104	0				1.97081	29.8517	30
			1.97181	0.94406	0.938423				1.97181	-0.37775	0				1.97181	29.8519	30
			1.97281	0.94416	0.938423				1.97281	-0.38433	0				1.97281	29.8521	30
			1.97381	0.94426	0.938423				1.97381	-0.39077	0				1.97381	29.8523	30
			1.97481	0.94435	0.938423				1.97481	-0.39708	0				1.97481	29.8525	30
			1.97581	0.94445	0.938423				1.97581	-0.40336	0				1.97581	29.8526	30
			1.97681	0.94454	0.938423				1.97681	-0.4096	0				1.97681	29.8528	30
			1.97781	0.94464	0.938423				1.97781	-0.41581	0				1.97781	29.853	30
			1.97881	0.94473	0.938423				1.97881	-0.42201	0				1.97881	29.8531	30
			1.97981	0.94482	0.938423				1.97981	-0.4282	0				1.97981	29.8533	30
[truncated: 6,080 more rows]

## Sheet: Figure 5
Figure5	Unit (‰）
Years	d15N (Summit, Hastings et al., 2009)		Years	d15N (Summit, Geng et al., 2014)		Years	d15N (SE-Dome)	(This study)
1890.6	9.46		1890	11.93		1959	-0.120931
1894	9.48		1891	12.18		1960	-3.48469
1898	9.41		1892	17.92		1961	-0.540377
1902.1	9.38		1893	17.87		1962	-0.255632
1906.3	10.32		1894	12.77		1963	-0.123893
1910.4	7.24		1895	9.49		1964	-1.80866
1914.6	8.12		1896	11.31		1965	-0.590008
1918.8	9.06		1897	9.5		1966	-2.58024
1922.9	9.06		1898	8.95		1967	-2.70101
1927.1	5.88		1899	10.05		1968	-2.58541
1931.3	7.53		1900	15.52		1969	-2.39599
1934.9	7.19		1901	11.77		1970	-3.35491
1937.9	6.47		1902	9.33		1971	-4.25602
1940.4	6.38		1903	12.04		1972	-6.69388
1943	6.86		1904	10.67		1973	-5.13231
1945.6	5.52		1905	9.58		1974	-8.93043
1948.2	6.43		1906	11		1975	-3.48959
1950.8	5.29		1907	12.7		1976	-7.81282
1953.5	4.76		1908	10.83		1977	-6.29188
1956.1	2.01		1909	9.42		1978	-4.65896
1958.7	3.4		1910	9.01		1979	-6.49474
1961.4	4.08		1911	11.1		1980	-4.71948
1964.1	1.2		1912	11.09		1981	-4.69413
1966.8	0.34		1913	10.85		1982	-5.71061
1969.5	-1.26		1914	11.94		1983	-4.9408
1972.2	-2.55		1915	8.28		1984	-4.85563
1974.8	-0.95		1916	7.54		1985	-5.09199
1977.5	-1.74		1917	8.1		1986
1980.3	-0.71		1918	8.61		1987	-1.78516
1983.1	-2.39		1919	8.8		1988	-5.83788
1985.7	1.39		1920	10.95		1989	-3.65692
1987.9	0.9		1921	10.1		1990
1990.1	3.12		1922	9.97		1991	-2.9209
1992.3	-0.67		1923	10.55		1992
1994.6	-0.63		1924	12.29		1993
1996.8	-0.57		1925	8.89		1994	-3.35663
1999	-1.38		1926	11.23		1995	-6.92395
2001.2	0.39		1927	9.69		1996	-5.9135
2003.3	-2.88		1928	8.99		1997	-4.66176
2005.4	0.77		1929	9.2		1998	-3.04643
			1930	8.33		1999	-4.54209
			1931	8.74		2000	-5.55708
			1932	7.73		2001	-5.65297
			1933	8.34		2002	-6.06108
			1934	6.85		2003	-4.64066
			1935	7.32		2004	-2.91727
			1936	9.96		2005	-2.98378
			1937	9.77		2006	-3.89256
			1938	5.88		2007	-5.58921
			1939	6.94		2008	-5.68366
			1940	9.42		2009	-5.4994
			1941	4.01		2010	-4.45421
			1942	6.56		2011	-4.28637
			1943	6.46		2012	-3.89167
			1944	7.39		2013	-3.5559
			1945	7.89		2014	-5.10861
			1946	7.11
			1947	10.1
			1948	8.72
			1949	4.27
			1950	5.1
			1951	7.56
			1952	4.25
			1953	3.77
			1954	5.84
			1955	2.71
			1956	6.68
			1957	4.29
			1958	3.42
			1959	4.71
			1960	5.02
			1961	7.07
			1962	6
			1963	5.84
			1964	3.73
			1965	3.76
			1966	-0.97
			1967	-0.42
			1968	-3.63
			1969	-3.71
			1970	1.85
			1971	1.77
			1972	-2.8
			1973	3.02
			1974	1.93
			1975	1.71
			1976	-4.59
			1977	-3.84
			1978	-5.39
			1979	-1.49
			1980	2.82
			1981	0.76
			1982	-0.72
			1983	0.56
			1984	-0.42
			1985	0.68
			1986	-0.63
			1987	0.99
			1988	2.62
			1989	-1.84
			1990	-2.26
			1991	-0.19
			1992	-0.04
			1993	-2.09
			1994	-1.36
			1995	-6.08
			1996	-1.72
			1997	-3.75
			1998	-0.5
			1999	-0.54
			2000	1.18
			2001	-0.77
			2002	-7.78
			2003	0.86
			2004	-1.86
			2005	4.33
			2006	1.44

## Sheet: Figure S1
Figure S1	FigureS1 a	Years	Summer	Winter		FigureS1 b	Years	Summer	Winter		FigureS1 c	Years	Summer	Winter		FigureS1 d	Years	Spring	Summer	Autumn	Winter		FigureS1 e	Years	Summer	Winter		FigureS1 f	Years	Summer	Winter			FigureS1 g	Years	Summer	Winter		FigureS1 h	Years	Spring	Summer	Autumn	Winter
	d15N(NO3−) (1959-2014)	2014	-3.94446	-7.47085		d15N(NO3−) (1959-1974)	1974	-5.77769	-12.4086		d15N(NO3−) (1959-1974)	2014	-3.94446	-7.47085		d15N(NO3−) (1959-1974)	1994	-0.89227	-3.98987	-9.12339	-4.35909		D17O(NO3−)	2014	24.1774	32.3871		D17O(NO3−)	2014	24.1774	32.9515			D17O(NO3−)	1994	28.2018	29.4689		the NO3− flux	1960		0.9		0.44354
	Unit (‰)	2013	-1.5902	-6.27767		Unit (‰)	1973	-4.13624	-7.06362		Unit (‰)	2013	-1.5902	-6.27767		Unit (‰)	1993		-8.56921	-9.80579	-10.0477		Unit (‰)	2013	26.845	24.6348		Unit (‰)	2013	26.845	32.5037			Unit (‰)	1993	34.2246	32.6064		Unit (mmol m−2 yr−1)	1961		0.54513		0.3937
		2012	-1.40771	-8.40032			1972	-7.17278	-6.1823			2012	-1.40771	-8.40032			1992	4.78079	-6.2605	-7.90138				2012	27.1573	29.849			2012	27.1573	31.4294				1992	28.1224				1962		0.62763		0.34578
		2011	-2.39333	-7.67238			1971	0.81918	-8.97448			2011	-2.39333	-7.67238			1991	-1.59118	-0.46772	-9.14985	-6.42491			2011	26.1579	33.5649			2011	26.1579	30.3828				1991	25.8837	32.8495			1963		0.4774		0.2669
		2010	-3.97053	-5.03737			1970	-1.75768	-7.02957			2010	-3.97053	-5.03737			1990	-3.13272	-8.25951	-9.66952				2010	28.1271	32.528			2010	28.1271	31.8461				1990	29.951				1964		0.62471		0.51815
		2009	-3.5815	-7.32947			1969	-0.25743	-4.27044			2009	-3.5815	-7.32947			1989	-2.37819	-8.62252	-1.30253	-5.30448			2009	27.3288	32.804			2009	27.3288	30.3699				1989	34.5276	31.9472			1965		0.51907		0.54398
		2008	-3.6577	-9.02699			1968	-1.76268	-5.66052			2008	-3.6577	-9.02699			1988	-3.43677	-6.16694	-7.91848	-6.12217			2008	28.7968	31.6245			2008	28.7968	30.3872				1988	33.4407	33.8769			1966		0.64574		0.3913
		2007	-3.53036	-9.12024			1967	-1.36208	-4.07014			2007	-3.53036	-9.12024			1987	-13.5437	1.29587	-11.9426	-10.1141			2007	28.7983	33.527			2007	28.7983	32.7128				1987	28.2196	35.1201			1967		0.81632		0.47597
		2006	-1.85584	-6.81686			1966	-0.28748	-7.40513			2006	-1.85584	-6.81686			1986	-5.34619	-4.16897	-11.4105				2006	27.8676	32.0879			2006	27.8676	32.053				1986	31.3972				1968		0.59942		0.41748
		2005	-5.16989	-2.22764			1965	2.49769	-5.99903			2005	-5.16989	-2.22764			1985	-5.45849	-2.02809	-6.19459	-7.36732			2005	30.9432	30.0689			2005	30.9432	31.9744				1985	26.6561	34.3957			1969		0.26765		0.77382
		2004	-2.16434	-5.38895			1964	0.07006	-4.43368			2004	-2.16434	-5.38895			1984	-6.77199	-3.87327	-3.26177	-9.42613			2004	27.845	31.2757			2004	27.845	30.8502				1984	27.6076	32.279			1970		0.94745		0.28862
		2003	-3.16619	-6.03407			1963	2.02699	-1.98702			2003	-3.16619	-6.03407			1983	-3.15536	-2.25747	-6.08697	-10.2971			2003	28.3551	31.4336			2003	28.3551	30.3701				1983	28.8543	34.1292			1971		0.61996		0.65603
		2002	-4.22331	-9.67772			1962	1.36199	-3.41215			2002	-4.22331	-9.67772			1982	-4.37461	-7.47091	-9.54581	-4.5945			2002	26.7393	31.809			2002	26.7393	31.056				1982	31.9131	26.7674			1972		1.17663		0.5979
		2001	-3.84849	-9.02154			1961	-0.54686	-0.52683			2001	-3.84849	-9.02154			1981	-4.59953	-2.41844	-12.5722	-2.14235			2001	29.4665	31.066			2001	29.4665	30.6557				1981	27.2925	26.8045			1973		0.72415		0.38791
		2000	-2.97828	-8.44776			1960	-4.28145	-1.59543			2000	-2.97828	-8.44776										2000	27.6471	32.9404			2000	27.6471	31.5051									1974		0.84748		0.75604
		1999	-1.24288	-8.64673			1959	0.48568	-1.15077			1999	-1.24288	-8.64673										1999	28.7064	32.3001			1999	28.7064	33.3604									1975		0.57632		0.46323
		1998	-1.6	-4.80914								1998	-1.6	-4.80914										1998	27.6	31.5633			1998	27.6	33.9374									1976		0.48103		0.39472
		1997	-0.5	-9.7								1997	-0.5	-9.7										1997	28.2	32.2			1997	28.2	27.4977									1977		0.63496		0.5245
		1996	-1.9	-9.2								1996	-1.9	-9.2										1996	28.1	32.7			1996	28.1	27.1555									1978		0.50101		0.61184
		1995	-7.6	-5.7								1995	-7.6	-5.7										1995	31.7	29.4			1995	31.7	26.4787									1979		1.13077		0.62458
		1994	-3.98987	-4.35909								1980	-3.72489	-7.2										1994	28.2018	29.4689			1980	26.7291	32.3871									1980	0.58966	0.26963	0.16775	0.31423
		1993	-8.56921	-10.0477								1979	-4.7	-8.6										1993	34.2246	32.6064			1979	27.8	24.6348									1981	0.07218	0.62983	0.5747	0.17087
		1992	-6.2605									1978	-2.0337	-9.20342										1992	28.1224				1978	27.9362	29.849									1982	1.38002	0.43203	0.33003	0.08427
		1991	-0.46772	-6.42491								1977	-3.57517	-13.3475										1991	25.8837	32.8495			1977	28.1706	33.5649									1983	0.29131	0.74156	0.2497	0.18583
		1990	-8.25951									1976	-3	-12.7757										1990	29.951				1976	26.9	32.528									1984	0.74607	0.85424	0.1973	0.11394
		1989	-8.62252	-5.30448								1975	-0.29629	-8.34024										1989	34.5276	31.9472			1975	28.8737	32.804									1985	0.55063	0.17469	0.19794	0.18373
		1988	-6.16694	-6.12217																				1988	33.4407	33.8769			1974	27.6989	31.6245									1986	0.2091	0.56745	0.12725	0.17798
		1987	1.29587	-10.1141																				1987	28.2196	35.1201			1973	27.5971	33.527									1987	0.22064	1.97361	0.16055	0.22279
		1986	-4.16897																					1986	31.3972				1972	26.5772	32.0879									1988	0.16807	0.04242	0.14992	0.05481
		1985	-2.02809	-7.36732																				1985	26.6561	34.3957			1971	27.4476	30.0689									1989	0.53562	0.24945	0.18855	0.15826
		1984	-3.87327	-9.42613																				1984	27.6076	32.279			1970	27.2062	31.2757									1990	0.24506	0.9081	0.19986	0.16213
		1983	-2.25747	-10.2971																				1983	28.8543	34.1292			1969	26.4234	31.4336									1991	0.33781	0.29506	0.19223	0.21928
		1982	-7.47091	-4.5945																				1982	31.9131	26.7674			1968	27.3918	31.809									1992	0.40066	0.20603	0.13696	0.31598
		1981	-2.41844	-2.14235																				1981	27.2925	26.8045			1967	26.5712	31.066									1993	0.44643	0.39951	0.16246	0.12873
		1980	-3.72489	-7.2																				1980	26.7291	31			1966	26.9126	32.9404									1994		0.67835		0.27199
		1979	-4.7	-8.6																				1979	27.8	32.9			1965	30.2404	32.3001									1995		0.50676		0.43201
		1978	-2.0337	-9.20342																				1978	27.9362	32.9515			1964	26.6667	31.5633									1996		0.72474		0.41867
		1977	-3.57517	-13.3475																				1977	28.1706	32.5037			1963	27.8373	32.2									1997		1.08285		0.41694
		1976	-3	-12.7757																				1976	26.9	31.4294			1962	28.4431	32.7									1998		0.59732		0.57926
		1975	-0.29629	-8.34024																				1975	28.8737	30.3828			1961	27.6879	29.4									1999		0.58139		0.38274
		1974	-5.77769	-12.4086																				1974	27.6989	31.8461			1960	30.0391	31									2000		0.34969		0.31697
		1973	-4.13624	-7.06362																				1973	27.5971	30.3699			1959	27.4113	32.9									2001		0.51455		0.26538
		1972	-7.17278	-6.1823																				1972	26.5772	30.3872														2002		0.5897		0.55204
		1971	0.81918	-8.97448																				1971	27.4476	32.7128														2003		0.39603		0.42597
		1970	-1.75768	-7.02957																				1970	27.2062	32.053														2004		0.62671		0.27241
		1969	-0.25743	-4.27044																				1969	26.4234	31.9744														2005		0.31042		0.35416
		1968	-1.76268	-5.66052																				1968	27.3918	30.8502														2006		0.81322		0.21757
		1967	-1.36208	-4.07014																				1967	26.5712	30.3701														2007		0.30888		0.30207
		1966	-0.28748	-7.40513																				1966	26.9126	31.056														2008		0.55626		0.26433
		1965	2.49769	-5.99903																				1965	30.2404	30.6557														2009		0.43831		0.25021
		1964	0.07006	-4.43368																				1964	26.6667	31.5051														2010		0.70744		0.50631
		1963	2.02699	-1.98702																				1963	27.8373	33.3604														2011		0.5131		0.59235
		1962	1.36199	-3.41215																				1962	28.4431	33.9374														2012		0.64971		0.33296
		1961	-0.54686	-0.52683																				1961	27.6879	27.4977														2013		0.67438		0.32302
		1960	-4.28145	-1.59543																				1960	30.0391	27.1555														2014		0.98464		0.41525
		1959	0.48568	-1.15077																				1959	27.4113	26.4787

## Sheet: Figure S2
Figure4	Unit (‰)	FigureS2 a										FigureS2 b										FigureS2 c										FigureS2 d
		Summit	fexp	d15N(NO3-)	D17O(NO3-)		SE-Dome	fexp	d15N(NO3-)	D17O(NO3-)		Summit	fexp	d15N(NO3-)	D17O(NO3-)		SE-Dome	fexp	d15N(NO3-)	D17O(NO3-)		Summit	fexp	d15N(NO3-)	D17O(NO3-)		SE-Dome	fexp	d15N(NO3-)	D17O(NO3-)		Summit	fexp	d15N(NO3-)	D17O(NO3-)		SE-Dome	fexp	d15N(NO3-)	D17O(NO3-)
			0	0	-1.28		A = 0.25 m w.e.	0	0.005601	-1.01126			0	0	-1.28		A = 0.6 m w.e.	0	8.46568e-08	-0.457941			0	0	-1.28		A = 1.01 m w.e.	0	-2.11642e-08	-0.280262			0	0	-1.28		A = 1.40 m w.e.	0	1.05821e-08	-0.204369
			0.1	0.77	-1.16			0.1	0.724901	-0.920483			0.1	0.77	-1.16			0.1	0.311967	-0.418106			0.1	0.77	-1.16			0.1	0.187631	-0.256376			0.1	0.77	-1.16			0.1	0.135669	-0.187132
			0.2	1.53	-1.04			0.2	1.42497	-0.831516			0.2	1.53	-1.04			0.2	0.618705	-0.378807			0.2	1.53	-1.04			0.2	0.373135	-0.23271			0.2	1.53	-1.04			0.2	0.270177	-0.170023
			0.3	2.26	-0.93			0.3	2.10628	-0.744316			0.3	2.26	-0.93			0.3	0.920315	-0.340036			0.3	2.26	-0.93			0.3	0.556541	-0.209263			0.3	2.26	-0.93			0.3	0.403537	-0.153036
			0.4	2.97	-0.82			0.4	2.7693	-0.658869			0.4	2.97	-0.82			0.4	1.2169	-0.301783			0.4	2.97	-0.82			0.4	0.73788	-0.186031			0.4	2.97	-0.82			0.4	0.535761	-0.136166
			0.5	3.66	-0.71			0.5	3.41449	-0.575142			0.5	3.66	-0.71			0.5	1.50855	-0.264048			0.5	3.66	-0.71			0.5	0.917184	-0.163012			0.5	3.66	-0.71			0.5	0.666863	-0.119413
			0.6	4.33	-0.6			0.6	4.0423	-0.493116			0.6	4.33	-0.6			0.6	1.79537	-0.226814			0.6	4.33	-0.6			0.6	1.09448	-0.140209			0.6	4.33	-0.6			0.6	0.796856	-0.102783
			0.7	4.98	-0.49			0.7	4.65318	-0.412762			0.7	4.98	-0.49			0.7	2.07744	-0.190084			0.7	4.98	-0.49			0.7	1.2698	-0.11762			0.7	4.98	-0.49			0.7	0.925752	-0.0862694
			0.8	5.61	-0.39			0.8	5.24756	-0.334063			0.8	5.61	-0.39			0.8	2.35487	-0.153837			0.8	5.61	-0.39			0.8	1.44317	-0.0952301			0.8	5.61	-0.39			0.8	1.05356	-0.0698681
			0.9	6.22	-0.29			0.9	5.82588	-0.256987			0.9	6.22	-0.29			0.9	2.62774	-0.118082			0.9	6.22	-0.29			0.9	1.61461	-0.0730534			0.9	6.22	-0.29			0.9	1.1803	-0.0535793
			1	6.82	-0.19			1	6.38854	-0.181503			1	6.82	-0.19			1	2.89615	-0.0827961			1	6.82	-0.19			1	1.78417	-0.0510731			1	6.82	-0.19			1	1.30598	-0.0374088

## Sheet: Figure S3
Figure S2	Unit (%)	SE-Dome						Summit
		Years	RUS	EU	NAM	GL		Years	RUS	EU	NAM	GL
		1960	1.44419	7.25636	3.02348	29.2735		1960	0.353297	2.86867	1.36804	63.4496
		1961	0.336272	3.3113	4.63717	32.2759		1961	0.0587	0.857432	5.25177	56.7403
		1962	0.817057	5.86248	4.9781	29.951		1962	0.0574	1.4191	3.24853	59.7499
		1963	0.695451	7.00331	3.90314	31.3196		1963	0.113321	1.69695	3.84259	52.9885
		1964	0.710072	7.3833	6.13699	23.4159		1964	0.109084	2.56694	6.13297	51.404
		1965	0.249931	5.83444	3.78031	33.699		1965	0.0443	2.19982	4.91828	50.5918
		1966	1.30617	3.7062	7.07761	34.7222		1966	0.202625	0.726266	6.04001	58.3933
		1967	0.134364	7.37969	6.75687	35.0402		1967	0.0945	1.33684	6.59942	57.9373
		1968	0.381131	4.83467	5.70818	31.6115		1968	0.0155	1.15271	5.03446	52.1854
		1969	0.543981	5.60676	3.76855	28.5268		1969	0.142862	1.45909	6.22175	54.133
		1970	1.04393	4.87675	3.65595	28.9939		1970	0.411942	1.67315	3.33618	59.856
		1971	0.344617	2.00114	5.65213	35.7636		1971	0.149515	0.664213	5.21444	58.7857
		1972	1.03249	14.1505	5.00675	24.8683		1972	0.370903	3.9684	4.66559	52.6093
		1973	0.0853	7.19357	7.39922	28.3237		1973	0.0358	1.7921	4.48246	54.4337
		1974	1.21613	4.2299	3.9548	33.3869		1974	0.130221	1.54316	4.71142	56.6959
		1975	0.0735	3.67512	6.14544	30.3083		1975	0.00874	1.69479	6.05842	54.5608
		1976	1.2318	8.29879	7.28196	21.0246		1976	0.401684	2.16916	5.18196	49.3652
		1977	0.141639	7.68146	3.57682	24.656		1977	0.0658	1.94759	6.1461	46.8394
		1978	0.264887	6.64904	4.08982	33.4339		1978	0.0248	0.844457	5.08934	55.4977
		1979	1.17724	6.49692	5.58821	33.3252		1979	0.395375	1.54209	5.33764	59.5317
		1980	0.313815	4.57704	5.45263	26.5204		1980	0.102312	1.73426	4.42098	54.014
		1981	2.0241	2.89048	4.53098	30.6162		1981	0.0919	0.514804	7.28649	50.8126
		1982	0.406433	6.11986	4.1709	42.8607		1982	0.115645	1.6425	4.29139	62.1462
		1983	0.1838	2.77994	3.87181	36.0418		1983	0.0293	1.03419	4.70748	56.3492
		1984	0.583208	4.31553	5.40039	32.6405		1984	0.161456	1.84215	5.9728	56.8577
		1985	0.217121	3.82223	8.66629	28.9963		1985	0.0337	1.23196	5.31778	49.8945
		1986	0.75581	3.78573	5.95722	28.6751		1986	0.084	1.14452	6.93991	53.8629
		1987	1.14067	6.18917	4.28645	24.2073		1987	0.519146	2.8593	4.00581	47.6254
		1988	0.270911	2.98603	6.13788	28.9051		1988	0.0562	0.652922	6.52625	51.0297
		1989	0.10463	3.03189	7.67107	31.5878		1989	0.0774	1.09185	6.41449	54.7418
		1990	1.73468	5.98525	5.32861	29.8894		1990	0.425722	1.33861	5.0987	54.9534
		1991	0.611499	4.67271	8.63184	26.2426		1991	0.25459	1.44846	7.43505	49.0548
		1992	0.415218	3.61267	7.62639	31.1366		1992	0.139136	1.25889	6.29616	53.3191
		1993	0.360137	2.73678	8.10217	29.3345		1993	0.155137	0.761743	5.90828	52.6835
		1994	0.589783	2.69619	9.49661	35.0535		1994	0.117143	1.32395	4.08031	66.1729
		1995	0.795529	6.58502	4.81509	29.3211		1995	0.228495	1.8679	4.54579	54.2004
		1996	0.870157	5.76247	7.71927	24.2344		1996	0.173613	1.65779	6.24071	45.9341
		1997	0.879658	4.53291	6.23197	30.0241		1997	0.256238	1.85162	6.93639	49.9319
		1998	0.64081	5.63706	3.67165	33.4901		1998	0.170384	0.941605	6.51391	52.2563
		1999	0.587625	4.81518	4.33909	28.9525		1999	0.162659	1.25989	4.24597	54.79
		2000	0.799008	3.44831	4.60372	32.5197		2000	0.228832	1.07651	6.13813	49.633
		2001	0.426586	5.50077	7.36752	23.8913		2001	0.142561	4.27324	6.86792	45.372
		2002	0.947358	8.39726	5.20708	24.7778		2002	0.270772	2.95478	2.88599	50.4947
		2003	0.422495	5.3518	7.92194	26.2764		2003	0.180274	1.48832	7.52256	46.6585
		2004	0.559721	3.74037	6.77835	28.2744		2004	0.184659	1.54374	5.01192	58.3725
		2005	0.611038	3.5299	5.37349	28.423		2005	0.139607	1.48643	6.513	47.9224
		2006	0.560851	5.13606	4.30958	38.2209		2006	0.154411	1.06575	3.26886	68.1832
		2007	0.352874	2.02459	6.30775	40.2851		2007	0.120011	0.74365	4.2879	66.1236
		2008	0.405789	5.19859	5.22869	35.1677		2008	0.134593	0.883194	6.23063	61.0118
		2009	0.574002	6.4482	2.36621	32.8884		2009	0.229722	1.84292	2.25578	56.9229
		2010	1.40103	5.79861	3.43855	34.5049		2010	0.131428	1.66026	4.72414	58.6194
		2011	0.499653	3.8768	7.01022	35.6298		2011	0.0761	1.05521	3.85646	65.8594
		2012	0.941547	2.32836	4.43431	41.7322		2012	0.146337	0.651151	4.00416	60.3258
		2013	0.573296	3.55923	4.3672	33.2572		2013	0.15563	0.924801	4.75647	60.1555
		2014	3.49708	7.77534	4.6072	32.6386		2014	0.2758	2.92362	5.50109	57.7502
		2015	0.340783	2.75868	6.12548	35.2923		2015	0.0753	0.653381	5.7094	56.9981
		2016	1.00166	3.58578	6.24356	32.5155		2016	0.842652	1.45216	1.93807	61.0329
		2017	0.833314	5.76623	7.055	28.1986		2017	0.322756	1.75333	8.60725	47.7067
		2018	1.17863	5.00708	5.63832	30.874		2018	0.396427	2.48249	3.58947	60.7828
		2019	1.01229	8.68482	2.76256	34.0632		2019	0.586767	2.89127	2.51017	61.1028
