# Supplementary material for: A 60-year atmospheric nitrate isotope record from a southeastern Greenland ice core with minimal postdepositional alteration
Source: Copernicus journal article supplement (doi:10.5194/acp-25-5727-2025), 2025-06-11
Supplement: Supplementary file 2 [file acp-25-5727-2025-supplement.zip]

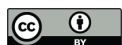

*Supplement of*

## **A 60-year atmospheric nitrate isotope record from a southeastern Greenland ice core with minimal postdepositional alteration**

**Zhao Wei et al.**

*Correspondence to:* Shohei Hattori ([hattori@nju.edu.cn](mailto:hattori@nju.edu.cn))

- [acp-25-5727-2025-supplement-title-page.pdf](#)
- [Figure\\_data\\_file\\_final\\_R1.xlsx](#)
- [Supplement\\_data\\_file1.xlsx](#)
- [Supporting Information\\_ACP.pdf](#)

The copyright of individual parts of the supplement might differ from the article licence.
