# Supplementary material for: A 60-year atmospheric nitrate isotope record from a southeastern Greenland ice core with minimal postdepositional alteration
Source: Copernicus journal article supplement (doi:10.5194/acp-25-5727-2025), 2025-06-11
Supplement: Supplementary file 3 [file Supplement_data_file1.xlsx]

## Sheet: Weekly P & T (ERA)
Start Time			End Time			Air pressure	Air temperature
Y	M	D	Y	M	D	hPa	degC			# pp [mb] se	a-level pressure
1950	1	1	1950	1	7	668.295	-22.9625			# coordinate	s: 65.60N, -37.63E, 50.0m; ECA station code: 299 TASIILAQ GL
1950	1	8	1950	1	14	663.219	-22.2167
1950	1	15	1950	1	21	659.763	-22.6673
1950	1	22	1950	1	28	645.725	-28.1497
1950	1	29	1950	2	4	654.808	-23.3555
1950	2	5	1950	2	11	662.62	-23.8312
1950	2	12	1950	2	18	656.938	-27.2305
1950	2	19	1950	2	25	662.039	-23.5843
1950	2	26	1950	3	4	651.267	-23.9944
1950	3	5	1950	3	11	674.168	-19.7285
1950	3	12	1950	3	18	667.285	-19.111
1950	3	19	1950	3	25	660.49	-22.0694
1950	3	26	1950	4	1	667.395	-17.4601
1950	4	2	1950	4	8	660.151	-25.8809
1950	4	9	1950	4	15	668.938	-17.7281
1950	4	16	1950	4	22	668.395	-20.989
1950	4	23	1950	4	29	681.516	-12.0385
1950	4	30	1950	5	6	672.595	-18.1113
1950	5	7	1950	5	13	680.683	-15.1918
1950	5	14	1950	5	20	691.623	-7.91715
1950	5	21	1950	5	27	681.543	-9.81209
1950	5	28	1950	6	3	674.647	-14.8413
1950	6	4	1950	6	10	674.256	-11.6593
1950	6	11	1950	6	17	683.691	-6.18873
1950	6	18	1950	6	24	689.462	-3.49519
1950	6	25	1950	7	1	679.067	-9.65372
1950	7	2	1950	7	8	683.385	-9.695
1950	7	9	1950	7	15	683.605	-8.91425
1950	7	16	1950	7	22	688.624	-7.05901
1950	7	23	1950	7	29	684.338	-8.03449
1950	7	30	1950	8	5	682.045	-6.99609
1950	8	6	1950	8	12	676.028	-8.23244
1950	8	13	1950	8	19	681.357	-7.62593
1950	8	20	1950	8	26	690.144	-8.64239
1950	8	27	1950	9	2	674.176	-12.7475
1950	9	3	1950	9	9	668.773	-13.0777
1950	9	10	1950	9	16	670.541	-15.464
1950	9	17	1950	9	23	678.679	-12.8896
1950	9	24	1950	9	30	673.271	-15.2316
1950	10	1	1950	10	7	665.694	-19.3591
1950	10	8	1950	10	14	670.901	-15.8018
1950	10	15	1950	10	21	669.763	-17.9175
1950	10	22	1950	10	28	668.594	-18.2142
1950	10	29	1950	11	4	678.045	-15.1526
1950	11	5	1950	11	11	658.345	-19.4775
1950	11	12	1950	11	18	662.882	-24.1706
1950	11	19	1950	11	25	682.184	-14.7886
1950	11	26	1950	12	2	667.834	-25.5507
1950	12	3	1950	12	9	667.674	-18.9193
1950	12	10	1950	12	16	668.155	-21.3944
1950	12	17	1950	12	23	669.283	-20.9537
1950	12	24	1950	12	30	680.85	-19.6955
1950	12	31	1951	1	6	667.202	-21.1908
1951	1	7	1951	1	13	660.456	-23.6272
1951	1	14	1951	1	20	661.354	-23.6198
1951	1	21	1951	1	27	650.491	-28.8876
1951	1	28	1951	2	3	646.51	-28.2034
1951	2	4	1951	2	10	659.978	-22.7284
1951	2	11	1951	2	17	660.806	-27.6908
1951	2	18	1951	2	24	663.729	-26.9353
1951	2	25	1951	3	3	653.202	-27.3259
1951	3	4	1951	3	10	684.505	-20.6688
1951	3	11	1951	3	17	671.852	-26.8063
1951	3	18	1951	3	24	669.56	-24.9087
1951	3	25	1951	3	31	675.749	-19.0744
1951	4	1	1951	4	7	667.228	-24.2843
1951	4	8	1951	4	14	669.603	-25.372
1951	4	15	1951	4	21	673.021	-27.7368
1951	4	22	1951	4	28	675.391	-17.2677
1951	4	29	1951	5	5	687.551	-12.4754
1951	5	6	1951	5	12	678.857	-14.7256
1951	5	13	1951	5	19	673.876	-15.3773
1951	5	20	1951	5	26	686.031	-11.6582
1951	5	27	1951	6	2	682.265	-10.5958
1951	6	3	1951	6	9	690.853	-4.73473
1951	6	10	1951	6	16	684.497	-10.9016
1951	6	17	1951	6	23	681.308	-6.72775
1951	6	24	1951	6	30	685.414	-6.16941
1951	7	1	1951	7	7	681.278	-7.30208
1951	7	8	1951	7	14	679.896	-5.34285
1951	7	15	1951	7	21	679.722	-10.2633
1951	7	22	1951	7	28	681.476	-7.87284
1951	7	29	1951	8	4	681.885	-8.15686
1951	8	5	1951	8	11	685.863	-6.7467
1951	8	12	1951	8	18	680.985	-5.58208
1951	8	19	1951	8	25	674.571	-10.7645
1951	8	26	1951	9	1	686.899	-6.72687
1951	9	2	1951	9	8	678.227	-12.3161
1951	9	9	1951	9	15	677.483	-11.6615
1951	9	16	1951	9	22	681.114	-5.97344
1951	9	23	1951	9	29	680.661	-8.89086
1951	9	30	1951	10	6	675.874	-14.2491
1951	10	7	1951	10	13	655.72	-19.2197
1951	10	14	1951	10	20	660.027	-22.3053
1951	10	21	1951	10	27	669.684	-21.0927
1951	10	28	1951	11	3	671.745	-16.9991
1951	11	4	1951	11	10	677.473	-14.2181
1951	11	11	1951	11	17	674.451	-16.4414
1951	11	18	1951	11	24	664.44	-21.2861
1951	11	25	1951	12	1	657.896	-23.7042
1951	12	2	1951	12	8	655.712	-28.6205
1951	12	9	1951	12	15	657.462	-23.278
1951	12	16	1951	12	22	643.419	-25.345
1951	12	23	1951	12	29	648.229	-27.1517
1951	12	30	1952	1	5	657.02	-25.1252
1952	1	6	1952	1	12	647.139	-28.7236
1952	1	13	1952	1	19	655.428	-28.1224
1952	1	20	1952	1	26	677.366	-16.9182
1952	1	27	1952	2	2	653.614	-24.4801
1952	2	3	1952	2	9	667.144	-22.3173
1952	2	10	1952	2	16	675.896	-14.6901
1952	2	17	1952	2	23	661.994	-24.5607
1952	2	24	1952	3	1	671.262	-25.6703
1952	3	2	1952	3	8	679.868	-15.4332
1952	3	9	1952	3	15	672.09	-17.6641
1952	3	16	1952	3	22	651.992	-26.4371
1952	3	23	1952	3	29	675.617	-18.7449
1952	3	30	1952	4	5	669.536	-23.8565
1952	4	6	1952	4	12	656.687	-27.0521
1952	4	13	1952	4	19	671.794	-17.1432
1952	4	20	1952	4	26	673.069	-13.9747
1952	4	27	1952	5	3	684.612	-15.3406
1952	5	4	1952	5	10	683.651	-17.1765
1952	5	11	1952	5	17	681.099	-14.9887
1952	5	18	1952	5	24	673.597	-14.4822
1952	5	25	1952	5	31	687.554	-10.3188
1952	6	1	1952	6	7	678.278	-14.3408
1952	6	8	1952	6	14	681.464	-11.639
1952	6	15	1952	6	21	684.589	-6.79115
1952	6	22	1952	6	28	678.421	-9.7242
1952	6	29	1952	7	5	677.177	-11.9876
1952	7	6	1952	7	12	681.351	-10.6471
1952	7	13	1952	7	19	680.34	-8.41768
1952	7	20	1952	7	26	680.342	-5.10907
1952	7	27	1952	8	2	688.704	-5.80987
1952	8	3	1952	8	9	690.029	-3.15501
1952	8	10	1952	8	16	686.309	-3.0783
1952	8	17	1952	8	23	680.263	-8.47486
1952	8	24	1952	8	30	673.659	-12.2588
1952	8	31	1952	9	6	682.764	-5.63619
1952	9	7	1952	9	13	684.025	-7.78861
1952	9	14	1952	9	20	685.194	-9.22715
1952	9	21	1952	9	27	673.276	-15.5861
1952	9	28	1952	10	4	675.009	-17.0859
1952	10	5	1952	10	11	672.215	-16.0027
1952	10	12	1952	10	18	668.819	-17.5416
1952	10	19	1952	10	25	672.075	-16.0574
1952	10	26	1952	11	1	665.393	-18.448
1952	11	2	1952	11	8	666.876	-19.0784
1952	11	9	1952	11	15	678.259	-15.1122
1952	11	16	1952	11	22	682.619	-14.0934
1952	11	23	1952	11	29	673.176	-16.1317
1952	11	30	1952	12	6	679.872	-14.8997
1952	12	7	1952	12	13	674.273	-18.1496
1952	12	14	1952	12	20	660.944	-22.3228
1952	12	21	1952	12	27	671.42	-18.9702
1952	12	28	1953	1	3	675.93	-14.4091
1953	1	4	1953	1	10	669.242	-18.1153
1953	1	11	1953	1	17	650.8	-28.5414
1953	1	18	1953	1	24	661.809	-23.4114
1953	1	25	1953	1	31	654.145	-27.7026
1953	2	1	1953	2	7	673.338	-17.9302
1953	2	8	1953	2	14	669.32	-18.1373
1953	2	15	1953	2	21	660.343	-20.7745
1953	2	22	1953	2	28	646.534	-27.0884
1953	3	1	1953	3	7	662.472	-23.508
1953	3	8	1953	3	14	658.598	-24.3313
1953	3	15	1953	3	21	663.188	-25.7238
1953	3	22	1953	3	28	662.99	-25.503
1953	3	29	1953	4	4	674.009	-24.5019
1953	4	5	1953	4	11	671.997	-22.7774
1953	4	12	1953	4	18	678.387	-14.3477
1953	4	19	1953	4	25	679.893	-17.7926
1953	4	26	1953	5	2	676.667	-17.7409
1953	5	3	1953	5	9	680.793	-13.4631
1953	5	10	1953	5	16	682.89	-13.6239
1953	5	17	1953	5	23	679.889	-15.669
1953	5	24	1953	5	30	681.355	-8.4919
1953	5	31	1953	6	6	684.238	-8.39451
1953	6	7	1953	6	13	675.212	-13.1752
1953	6	14	1953	6	20	673.942	-12.598
1953	6	21	1953	6	27	682.138	-9.73621
1953	6	28	1953	7	4	684.228	-9.5104
1953	7	5	1953	7	11	682.09	-7.8724
1953	7	12	1953	7	18	679.37	-6.30859
1953	7	19	1953	7	25	684.581	-5.74562
1953	7	26	1953	8	1	684.086	-3.01244
1953	8	2	1953	8	8	677.223	-7.51413
1953	8	9	1953	8	15	674.981	-9.51135
1953	8	16	1953	8	22	685.079	-9.19404
1953	8	23	1953	8	29	684.356	-7.35967
1953	8	30	1953	9	5	680.292	-12.0048
1953	9	6	1953	9	12	681.621	-8.7167
1953	9	13	1953	9	19	672.996	-11.764
1953	9	20	1953	9	26	670.63	-13.6748
1953	9	27	1953	10	3	668.46	-18.9416
1953	10	4	1953	10	10	664.144	-21.5387
1953	10	11	1953	10	17	667.559	-19.381
1953	10	18	1953	10	24	660.887	-20.5608
1953	10	25	1953	10	31	658.568	-19.068
1953	11	1	1953	11	7	659.081	-20.0272
1953	11	8	1953	11	14	659.404	-27.4318
1953	11	15	1953	11	21	658.758	-20.3255
1953	11	22	1953	11	28	657.159	-21.8352
1953	11	29	1953	12	5	653.097	-25.5099
1953	12	6	1953	12	12	648.636	-25.2716
1953	12	13	1953	12	19	650.486	-24.5295
1953	12	20	1953	12	26	651.595	-26.1136
1953	12	27	1954	1	2	661.513	-24.1028
1954	1	3	1954	1	9	669.692	-23.9682
1954	1	10	1954	1	16	658.377	-20.2654
1954	1	17	1954	1	23	667.897	-21.8351
1954	1	24	1954	1	30	661.636	-25.0039
1954	1	31	1954	2	6	658.988	-26.63
1954	2	7	1954	2	13	660.536	-23.393
1954	2	14	1954	2	20	647.978	-26.2051
1954	2	21	1954	2	27	659.761	-23.3158
1954	2	28	1954	3	6	667.291	-23.961
1954	3	7	1954	3	13	670.06	-20.6101
1954	3	14	1954	3	20	673.536	-13.3614
1954	3	21	1954	3	27	662.166	-23.6585
1954	3	28	1954	4	3	657.783	-22.4561
1954	4	4	1954	4	10	658.961	-24.222
1954	4	11	1954	4	17	665.264	-23.657
1954	4	18	1954	4	24	682.423	-14.7853
1954	4	25	1954	5	1	689.286	-9.05722
1954	5	2	1954	5	8	685.03	-16.6695
1954	5	9	1954	5	15	680.106	-15.2113
1954	5	16	1954	5	22	681.186	-12.5656
1954	5	23	1954	5	29	685.794	-10.5751
1954	5	30	1954	6	5	684.209	-9.91733
1954	6	6	1954	6	12	685.731	-7.62314
1954	6	13	1954	6	19	675.997	-9.98326
1954	6	20	1954	6	26	677.071	-11.7535
1954	6	27	1954	7	3	682.54	-9.06412
1954	7	4	1954	7	10	680.604	-7.86756
1954	7	11	1954	7	17	676.956	-7.86139
1954	7	18	1954	7	24	677.351	-8.89861
1954	7	25	1954	7	31	686.32	-9.68728
1954	8	1	1954	8	7	684.585	-8.48678
1954	8	8	1954	8	14	682.928	-9.54978
1954	8	15	1954	8	21	679.588	-8.16992
1954	8	22	1954	8	28	684.021	-8.58247
1954	8	29	1954	9	4	677.333	-9.68042
1954	9	5	1954	9	11	682.548	-10.2339
1954	9	12	1954	9	18	668.646	-16.9872
1954	9	19	1954	9	25	673.275	-18.5772
1954	9	26	1954	10	2	673.387	-14.8939
1954	10	3	1954	10	9	664.048	-17.0038
1954	10	10	1954	10	16	669.029	-19.9315
1954	10	17	1954	10	23	662.362	-18.5227
1954	10	24	1954	10	30	667.275	-17.0264
1954	10	31	1954	11	6	667.909	-20.3692
1954	11	7	1954	11	13	651.297	-27.0187
1954	11	14	1954	11	20	655.946	-22.8728
1954	11	21	1954	11	27	661.595	-20.107
1954	11	28	1954	12	4	659.372	-17.9943
1954	12	5	1954	12	11	661.832	-25.6334
1954	12	12	1954	12	18	646.631	-26.361
1954	12	19	1954	12	25	658.774	-26.3042
1954	12	26	1955	1	1	662.563	-24.7398
1955	1	2	1955	1	8	684.265	-17.3749
1955	1	9	1955	1	15	669.267	-22.0178
1955	1	16	1955	1	22	653.785	-29.7341
1955	1	23	1955	1	29	657.855	-27.9406
1955	1	30	1955	2	5	666.786	-24.4069
1955	2	6	1955	2	12	680.086	-17.9568
1955	2	13	1955	2	19	686.639	-10.7142
1955	2	20	1955	2	26	665.798	-25.3594
1955	2	27	1955	3	5	663.524	-22.1072
1955	3	6	1955	3	12	664.968	-24.859
1955	3	13	1955	3	19	676.829	-17.5962
1955	3	20	1955	3	26	673.1	-23.8219
1955	3	27	1955	4	2	677.109	-14.9341
1955	4	3	1955	4	9	667.065	-16.9544
1955	4	10	1955	4	16	668.33	-19.7404
1955	4	17	1955	4	23	677.363	-19.3036
1955	4	24	1955	4	30	671.565	-20.4054
1955	5	1	1955	5	7	673.734	-17.4583
1955	5	8	1955	5	14	683.556	-15.1116
1955	5	15	1955	5	21	683.496	-12.7177
1955	5	22	1955	5	28	679.937	-11.099
1955	5	29	1955	6	4	684.295	-11.3835
1955	6	5	1955	6	11	687.122	-8.68558
1955	6	12	1955	6	18	681.474	-10.31
1955	6	19	1955	6	25	678.255	-7.91502
1955	6	26	1955	7	2	678.898	-10.9193
1955	7	3	1955	7	9	672.471	-11.5223
1955	7	10	1955	7	16	675.79	-8.93402
1955	7	17	1955	7	23	672.286	-10.9609
1955	7	24	1955	7	30	675.341	-9.04574
1955	7	31	1955	8	6	682.133	-4.51408
1955	8	7	1955	8	13	675.819	-8.71279
1955	8	14	1955	8	20	672.213	-11.8816
1955	8	21	1955	8	27	674.666	-9.77077
1955	8	28	1955	9	3	670.431	-10.5558
1955	9	4	1955	9	10	662.578	-14.9129
1955	9	11	1955	9	17	678.153	-14.0413
1955	9	18	1955	9	24	677.539	-12.5625
1955	9	25	1955	10	1	668.743	-14.3499
1955	10	2	1955	10	8	670.972	-18.3285
1955	10	9	1955	10	15	678.438	-13.447
1955	10	16	1955	10	22	674.494	-12.4252
1955	10	23	1955	10	29	683.257	-10.0701
1955	10	30	1955	11	5	678.946	-18.9139
1955	11	6	1955	11	12	670.659	-22.1299
1955	11	13	1955	11	19	676.368	-14.1941
1955	11	20	1955	11	26	675.666	-15.4695
1955	11	27	1955	12	3	659.224	-23.893
1955	12	4	1955	12	10	666.979	-26.2768
1955	12	11	1955	12	17	668.195	-21.5422
1955	12	18	1955	12	24	667.876	-23.3675
1955	12	25	1955	12	31	657.725	-24.428
1956	1	1	1956	1	7	651.068	-29.0061
1956	1	8	1956	1	14	671.386	-25.9569
1956	1	15	1956	1	21	661.409	-30.168
1956	1	22	1956	1	28	660.39	-25.2987
1956	1	29	1956	2	4	646.783	-28.7833
1956	2	5	1956	2	11	667.629	-21.9665
1956	2	12	1956	2	18	671.48	-22.6333
1956	2	19	1956	2	25	683.596	-14.6585
1956	2	26	1956	3	3	656.676	-20.2558
1956	3	4	1956	3	10	659.966	-20.2483
1956	3	11	1956	3	17	657.482	-23.2889
1956	3	18	1956	3	24	670.205	-18.8681
1956	3	25	1956	3	31	674.968	-16.2782
1956	4	1	1956	4	7	673.757	-16.6227
1956	4	8	1956	4	14	676.924	-16.6564
1956	4	15	1956	4	21	676.183	-15.9759
1956	4	22	1956	4	28	677.499	-16.0842
1956	4	29	1956	5	5	671.372	-18.0154
1956	5	6	1956	5	12	668.862	-16.3494
1956	5	13	1956	5	19	673.867	-12.9433
1956	5	20	1956	5	26	670.85	-14.4807
1956	5	27	1956	6	2	668.448	-19.2872
1956	6	3	1956	6	9	674.144	-16.2076
1956	6	10	1956	6	16	678.081	-11.8873
1956	6	17	1956	6	23	679.532	-11.269
1956	6	24	1956	6	30	691.024	-5.06146
1956	7	1	1956	7	7	683.058	-7.01271
1956	7	8	1956	7	14	681.911	-9.31252
1956	7	15	1956	7	21	685.265	-6.57272
1956	7	22	1956	7	28	682.445	-8.03454
1956	7	29	1956	8	4	687.081	-6.46059
1956	8	5	1956	8	11	682.242	-9.01909
1956	8	12	1956	8	18	684.575	-9.42913
1956	8	19	1956	8	25	680.997	-10.2689
1956	8	26	1956	9	1	686.37	-6.02902
1956	9	2	1956	9	8	681.821	-9.81543
1956	9	9	1956	9	15	670.469	-15.2676
1956	9	16	1956	9	22	678.966	-13.5557
1956	9	23	1956	9	29	673.745	-12.6969
1956	9	30	1956	10	6	674.793	-15.844
1956	10	7	1956	10	13	666.628	-16.6606
1956	10	14	1956	10	20	658.532	-18.8799
1956	10	21	1956	10	27	657.348	-22.7566
1956	10	28	1956	11	3	683.021	-10.7253
1956	11	4	1956	11	10	657.177	-17.2457
1956	11	11	1956	11	17	663.547	-19.9738
1956	11	18	1956	11	24	651.861	-25.5518
1956	11	25	1956	12	1	653.441	-28.0904
1956	12	2	1956	12	8	660.836	-25.1284
1956	12	9	1956	12	15	648.865	-25.5082
1956	12	16	1956	12	22	655.366	-24.6893
1956	12	23	1956	12	29	659.072	-23.2218
1956	12	30	1957	1	5	655.055	-20.9916
1957	1	6	1957	1	12	659.178	-23.4307
1957	1	13	1957	1	19	656.491	-25.2132
1957	1	20	1957	1	26	642.606	-29.6449
1957	1	27	1957	2	2	642.395	-26.5984
1957	2	3	1957	2	9	664.75	-22.6749
1957	2	10	1957	2	16	676.717	-21.1353
1957	2	17	1957	2	23	673.904	-26.9829
1957	2	24	1957	3	2	671.675	-21.6656
1957	3	3	1957	3	9	669.659	-24.8202
1957	3	10	1957	3	16	675.919	-20.706
1957	3	17	1957	3	23	663.823	-25.9933
1957	3	24	1957	3	30	667.407	-18.5893
1957	3	31	1957	4	6	673.087	-15.2096
1957	4	7	1957	4	13	680.318	-14.4061
1957	4	14	1957	4	20	654.386	-24.1911
1957	4	21	1957	4	27	672.602	-20.6707
1957	4	28	1957	5	4	677.097	-17.4611
1957	5	5	1957	5	11	675.364	-16.9628
1957	5	12	1957	5	18	685.076	-14.1076
1957	5	19	1957	5	25	680.009	-14.7252
1957	5	26	1957	6	1	678.83	-12.6547
1957	6	2	1957	6	8	685.566	-5.85654
1957	6	9	1957	6	15	684.07	-9.98221
1957	6	16	1957	6	22	692.532	-5.73747
1957	6	23	1957	6	29	688.33	-5.71281
1957	6	30	1957	7	6	685.871	-8.56037
1957	7	7	1957	7	13	685.134	-9.35402
1957	7	14	1957	7	20	686.648	-7.67136
1957	7	21	1957	7	27	686.471	-4.52666
1957	7	28	1957	8	3	683.977	-7.37488
1957	8	4	1957	8	10	688.021	-5.68252
1957	8	11	1957	8	17	679.338	-7.61749
1957	8	18	1957	8	24	674.06	-11.4356
1957	8	25	1957	8	31	677.445	-10.0508
1957	9	1	1957	9	7	677.457	-11.8862
1957	9	8	1957	9	14	677.632	-14.9023
1957	9	15	1957	9	21	690.066	-5.21881
1957	9	22	1957	9	28	678.418	-11.8182
1957	9	29	1957	10	5	678.006	-10.3279
1957	10	6	1957	10	12	657.24	-19.8305
1957	10	13	1957	10	19	662.582	-17.5565
1957	10	20	1957	10	26	653.928	-24.5702
1957	10	27	1957	11	2	653.941	-21.8744
1957	11	3	1957	11	9	668.509	-19.3808
1957	11	10	1957	11	16	681.379	-12.1796
1957	11	17	1957	11	23	663.954	-21.3143
1957	11	24	1957	11	30	668.525	-22.7007
1957	12	1	1957	12	7	665.924	-22.1178
1957	12	8	1957	12	14	662.498	-24.8481
1957	12	15	1957	12	21	645.273	-31.8921
1957	12	22	1957	12	28	654.899	-26.1645
1957	12	29	1958	1	4	663.014	-29.2476
1958	1	5	1958	1	11	643.727	-28.4723
1958	1	12	1958	1	18	655.405	-29.8019
1958	1	19	1958	1	25	680.502	-21.3829
1958	1	26	1958	2	1	658.67	-22.9848
1958	2	2	1958	2	8	675.867	-21.1818
1958	2	9	1958	2	15	661.579	-24.4083
1958	2	16	1958	2	22	677.16	-15.1628
1958	2	23	1958	3	1	663.973	-22.8502
1958	3	2	1958	3	8	673.841	-21.937
1958	3	9	1958	3	15	676.858	-25.6766
1958	3	16	1958	3	22	680.569	-17.0598
1958	3	23	1958	3	29	671.645	-22.9547
1958	3	30	1958	4	5	673.561	-16.8657
1958	4	6	1958	4	12	678.831	-13.1916
1958	4	13	1958	4	19	668.365	-18.9002
1958	4	20	1958	4	26	659.379	-22.3567
1958	4	27	1958	5	3	678.658	-17.0745
1958	5	4	1958	5	10	682.253	-16.7736
1958	5	11	1958	5	17	675.834	-19.3608
1958	5	18	1958	5	24	682.135	-15.6285
1958	5	25	1958	5	31	684.629	-8.82148
1958	6	1	1958	6	7	689.303	-5.33112
1958	6	8	1958	6	14	686.085	-9.14394
1958	6	15	1958	6	21	680.857	-8.90291
1958	6	22	1958	6	28	682.326	-12.2402
1958	6	29	1958	7	5	691.037	-6.76054
1958	7	6	1958	7	12	681.306	-7.05402
1958	7	13	1958	7	19	689.423	-0.961542
1958	7	20	1958	7	26	688.359	-3.25114
1958	7	27	1958	8	2	685.179	-10.8485
1958	8	3	1958	8	9	685.023	-8.87202
1958	8	10	1958	8	16	683.136	-11.728
1958	8	17	1958	8	23	685.491	-10.1605
1958	8	24	1958	8	30	678.578	-11.6573
1958	8	31	1958	9	6	682.945	-9.81735
1958	9	7	1958	9	13	676.377	-12.224
1958	9	14	1958	9	20	669.607	-12.2202
1958	9	21	1958	9	27	672.025	-13.6678
1958	9	28	1958	10	4	675.143	-8.8034
1958	10	5	1958	10	11	669.633	-13.9361
1958	10	12	1958	10	18	667.895	-18.2815
1958	10	19	1958	10	25	667.862	-19.9394
1958	10	26	1958	11	1	659.738	-21.6908
1958	11	2	1958	11	8	658.651	-20.6662
1958	11	9	1958	11	15	660.242	-21.1369
1958	11	16	1958	11	22	662.443	-21.2656
1958	11	23	1958	11	29	669.003	-19.3287
1958	11	30	1958	12	6	668.506	-21.8011
1958	12	7	1958	12	13	664.866	-22.6085
1958	12	14	1958	12	20	671.786	-21.8784
1958	12	21	1958	12	27	668.11	-23.8291
1958	12	28	1959	1	3	665.228	-24.3182
1959	1	4	1959	1	10	681.416	-15.4648
1959	1	11	1959	1	17	679.396	-14.7241
1959	1	18	1959	1	24	673.172	-18.7012
1959	1	25	1959	1	31	654.194	-27.1896
1959	2	1	1959	2	7	657.693	-24.881
1959	2	8	1959	2	14	646.832	-28.1865
1959	2	15	1959	2	21	649.569	-29.529
1959	2	22	1959	2	28	646.124	-28.8051
1959	3	1	1959	3	7	652.548	-28.0224
1959	3	8	1959	3	14	652.898	-23.211
1959	3	15	1959	3	21	659.341	-21.8647
1959	3	22	1959	3	28	664.475	-17.1067
1959	3	29	1959	4	4	652.151	-24.0771
1959	4	5	1959	4	11	671.114	-18.1371
1959	4	12	1959	4	18	681.879	-12.7116
1959	4	19	1959	4	25	676.781	-15.3889
1959	4	26	1959	5	2	673.43	-17.9455
1959	5	3	1959	5	9	674.268	-17.9093
1959	5	10	1959	5	16	683.678	-10.7133
1959	5	17	1959	5	23	682.991	-12.7634
1959	5	24	1959	5	30	678.579	-11.6026
1959	5	31	1959	6	6	671.852	-14.4707
1959	6	7	1959	6	13	673.786	-14.3686
1959	6	14	1959	6	20	683.144	-11.8304
1959	6	21	1959	6	27	689.274	-5.32125
1959	6	28	1959	7	4	684.538	-6.6166
1959	7	5	1959	7	11	681.418	-8.75762
1959	7	12	1959	7	18	678.028	-6.97363
1959	7	19	1959	7	25	679.831	-6.44282
1959	7	26	1959	8	1	682.211	-6.24619
1959	8	2	1959	8	8	678.173	-8.54719
1959	8	9	1959	8	15	678.107	-12.3384
1959	8	16	1959	8	22	684.428	-8.51357
1959	8	23	1959	8	29	680.069	-10.1471
1959	8	30	1959	9	5	673.608	-11.6662
1959	9	6	1959	9	12	673.171	-9.16005
1959	9	13	1959	9	19	678.26	-9.76635
1959	9	20	1959	9	26	663.082	-17.8716
1959	9	27	1959	10	3	673.397	-15.7479
1959	10	4	1959	10	10	675.61	-13.3073
1959	10	11	1959	10	17	669.143	-14.9443
1959	10	18	1959	10	24	659.269	-17.8621
1959	10	25	1959	10	31	660.191	-17.1808
1959	11	1	1959	11	7	656.349	-22.2777
1959	11	8	1959	11	14	663.852	-26.3888
1959	11	15	1959	11	21	682.98	-20.483
1959	11	22	1959	11	28	667.797	-20.0767
1959	11	29	1959	12	5	650.314	-21.4421
1959	12	6	1959	12	12	667.024	-19.6875
1959	12	13	1959	12	19	661.145	-22.6988
1959	12	20	1959	12	26	656.257	-26.4261
1959	12	27	1960	1	2	648.614	-27.8945
1960	1	3	1960	1	9	664.52	-20.5148
1960	1	10	1960	1	16	687.45	-13.2587
1960	1	17	1960	1	23	666.757	-22.8415
1960	1	24	1960	1	30	667.495	-25.0036
1960	1	31	1960	2	6	658.562	-25.4176
1960	2	7	1960	2	13	681.782	-14.2115
1960	2	14	1960	2	20	675.198	-19.4184
1960	2	21	1960	2	27	673.824	-29.7301
1960	2	28	1960	3	5	661.019	-29.4694
1960	3	6	1960	3	12	667.456	-23.185
1960	3	13	1960	3	19	667.721	-22.0704
1960	3	20	1960	3	26	668.576	-17.9142
1960	3	27	1960	4	2	681.155	-16.3909
1960	4	3	1960	4	9	658.931	-20.9824
1960	4	10	1960	4	16	662.074	-21.8489
1960	4	17	1960	4	23	666.373	-22.4102
1960	4	24	1960	4	30	678.742	-19.1958
1960	5	1	1960	5	7	674.209	-17.8324
1960	5	8	1960	5	14	686.407	-12.7194
1960	5	15	1960	5	21	684.646	-13.7207
1960	5	22	1960	5	28	665.472	-18.1057
1960	5	29	1960	6	4	682.254	-12.3985
1960	6	5	1960	6	11	681.018	-9.83515
1960	6	12	1960	6	18	676.112	-14.3084
1960	6	19	1960	6	25	677.108	-10.742
1960	6	26	1960	7	2	689.837	-6.6776
1960	7	3	1960	7	9	686.634	-5.54185
1960	7	10	1960	7	16	683.354	-6.91435
1960	7	17	1960	7	23	680.363	-9.39721
1960	7	24	1960	7	30	683.375	-8.82298
1960	7	31	1960	8	6	692.547	-6.25023
1960	8	7	1960	8	13	688.522	-3.84102
1960	8	14	1960	8	20	685.22	-6.32865
1960	8	21	1960	8	27	681.667	-6.67234
1960	8	28	1960	9	3	687.567	-5.55267
1960	9	4	1960	9	10	670.647	-11.6239
1960	9	11	1960	9	17	666.559	-15.2243
1960	9	18	1960	9	24	676.624	-14.8584
1960	9	25	1960	10	1	679.978	-14.5772
1960	10	2	1960	10	8	684.324	-10.202
1960	10	9	1960	10	15	682.08	-10.3827
1960	10	16	1960	10	22	680.584	-12.3052
1960	10	23	1960	10	29	680.098	-13.7245
1960	10	30	1960	11	5	665.561	-19.1821
1960	11	6	1960	11	12	667.99	-16.4922
1960	11	13	1960	11	19	670.646	-18.4992
1960	11	20	1960	11	26	674.598	-18.6178
1960	11	27	1960	12	3	661.504	-21.3583
1960	12	4	1960	12	10	659.005	-23.8718
1960	12	11	1960	12	17	656.778	-24.6309
1960	12	18	1960	12	24	663.228	-25.7851
1960	12	25	1960	12	31	659.886	-24.3448
1961	1	1	1961	1	7	671.387	-21.4834
1961	1	8	1961	1	14	655.598	-25.2316
1961	1	15	1961	1	21	656.582	-25.3947
1961	1	22	1961	1	28	664.532	-21.2164
1961	1	29	1961	2	4	663.038	-22.683
1961	2	5	1961	2	11	651.968	-26.6261
1961	2	12	1961	2	18	656.756	-25.7567
1961	2	19	1961	2	25	650.861	-27.2045
1961	2	26	1961	3	4	651.405	-25.8773
1961	3	5	1961	3	11	655.203	-27.489
1961	3	12	1961	3	18	663.292	-25.5392
1961	3	19	1961	3	25	660.343	-25.9165
1961	3	26	1961	4	1	667.363	-26.1528
1961	4	2	1961	4	8	672.252	-20.0769
1961	4	9	1961	4	15	669.742	-21.2626
1961	4	16	1961	4	22	672.107	-21.9873
1961	4	23	1961	4	29	679.454	-14.9968
1961	4	30	1961	5	6	674.179	-13.6104
1961	5	7	1961	5	13	677.533	-15.376
1961	5	14	1961	5	20	683.591	-10.2049
1961	5	21	1961	5	27	679.064	-14.9731
1961	5	28	1961	6	3	674.884	-11.9637
1961	6	4	1961	6	10	676.603	-10.8265
1961	6	11	1961	6	17	675.621	-11.4834
1961	6	18	1961	6	24	673.409	-9.91532
1961	6	25	1961	7	1	678.244	-11.6471
1961	7	2	1961	7	8	683.112	-8.17335
1961	7	9	1961	7	15	681.147	-10.0005
1961	7	16	1961	7	22	683.649	-7.83598
1961	7	23	1961	7	29	680.592	-9.34522
1961	7	30	1961	8	5	681.123	-6.35592
1961	8	6	1961	8	12	680.23	-6.88574
1961	8	13	1961	8	19	682.689	-8.94285
1961	8	20	1961	8	26	672.264	-13.0612
1961	8	27	1961	9	2	672.782	-10.8298
1961	9	3	1961	9	9	679.709	-5.32205
1961	9	10	1961	9	16	673.121	-11.0931
1961	9	17	1961	9	23	663.163	-16.028
1961	9	24	1961	9	30	668.904	-16.6479
1961	10	1	1961	10	7	671.852	-15.6256
1961	10	8	1961	10	14	664.121	-15.2833
1961	10	15	1961	10	21	674.622	-10.7665
1961	10	22	1961	10	28	670.933	-14.876
1961	10	29	1961	11	4	675.127	-19.6099
1961	11	5	1961	11	11	661.39	-19.3677
1961	11	12	1961	11	18	667.924	-18.8071
1961	11	19	1961	11	25	659.864	-25.6131
1961	11	26	1961	12	2	666.432	-24.8238
1961	12	3	1961	12	9	674.31	-19.6576
1961	12	10	1961	12	16	659.013	-23.213
1961	12	17	1961	12	23	685.511	-12.9471
1961	12	24	1961	12	30	676.3	-19.989
1961	12	31	1962	1	6	656.861	-22.8146
1962	1	7	1962	1	13	650.593	-25.3897
1962	1	14	1962	1	20	662.615	-25.0968
1962	1	21	1962	1	27	655.104	-25.8167
1962	1	28	1962	2	3	643.879	-29.3814
1962	2	4	1962	2	10	647.86	-29.0668
1962	2	11	1962	2	17	662.042	-28.0639
1962	2	18	1962	2	24	663.676	-26.0731
1962	2	25	1962	3	3	692.182	-16.894
1962	3	4	1962	3	10	681.401	-25.2471
1962	3	11	1962	3	17	682.338	-16.7419
1962	3	18	1962	3	24	685.664	-11.0104
1962	3	25	1962	3	31	670.96	-26.5779
1962	4	1	1962	4	7	658.168	-26.4985
1962	4	8	1962	4	14	669.454	-23.5073
1962	4	15	1962	4	21	669.954	-18.0122
1962	4	22	1962	4	28	676.427	-16.9671
1962	4	29	1962	5	5	680.201	-13.137
1962	5	6	1962	5	12	681.911	-14.4796
1962	5	13	1962	5	19	674.872	-18.7667
1962	5	20	1962	5	26	679.239	-14.0424
1962	5	27	1962	6	2	685.314	-10.3181
1962	6	3	1962	6	9	682.035	-11.0896
1962	6	10	1962	6	16	677.007	-13.961
1962	6	17	1962	6	23	676.135	-12.1943
1962	6	24	1962	6	30	678.843	-9.61176
1962	7	1	1962	7	7	686.07	-6.92175
1962	7	8	1962	7	14	690.574	-7.03989
1962	7	15	1962	7	21	688.203	-8.75005
1962	7	22	1962	7	28	683.653	-7.28308
1962	7	29	1962	8	4	685.825	-8.80106
1962	8	5	1962	8	11	681.129	-9.44807
1962	8	12	1962	8	18	678.943	-10.1818
1962	8	19	1962	8	25	676.987	-8.71657
1962	8	26	1962	9	1	682.888	-11.6658
1962	9	2	1962	9	8	684.233	-6.5028
1962	9	9	1962	9	15	680.946	-12.9124
1962	9	16	1962	9	22	671.903	-12.472
1962	9	23	1962	9	29	666.138	-16.3011
1962	9	30	1962	10	6	667.553	-14.5919
1962	10	7	1962	10	13	678.691	-12.4748
1962	10	14	1962	10	20	664.341	-15.7133
1962	10	21	1962	10	27	668.347	-22.1355
1962	10	28	1962	11	3	664.04	-23.3184
1962	11	4	1962	11	10	665.028	-18.7124
1962	11	11	1962	11	17	672.502	-22.8109
1962	11	18	1962	11	24	667.94	-15.3553
1962	11	25	1962	12	1	666.418	-24.5245
1962	12	2	1962	12	8	664.756	-20.9518
1962	12	9	1962	12	15	658.871	-24.6457
1962	12	16	1962	12	22	647.599	-26.4873
1962	12	23	1962	12	29	681.68	-17.6697
1962	12	30	1963	1	5	684.528	-17.0445
1963	1	6	1963	1	12	683.538	-18.0808
1963	1	13	1963	1	19	672.422	-21.7199
1963	1	20	1963	1	26	667.343	-24.3457
1963	1	27	1963	2	2	683.43	-18.1786
1963	2	3	1963	2	9	685.642	-19.4533
1963	2	10	1963	2	16	666.265	-19.1781
1963	2	17	1963	2	23	670.197	-19.2578
1963	2	24	1963	3	2	655.023	-25.3904
1963	3	3	1963	3	9	665.98	-19.8784
1963	3	10	1963	3	16	668.892	-17.868
1963	3	17	1963	3	23	675.365	-16.3427
1963	3	24	1963	3	30	658.036	-22.9049
1963	3	31	1963	4	6	676.711	-18.3577
1963	4	7	1963	4	13	677.535	-20.0458
1963	4	14	1963	4	20	672.559	-21.2221
1963	4	21	1963	4	27	668.637	-18.7308
1963	4	28	1963	5	4	665.516	-22.5194
1963	5	5	1963	5	11	670.225	-17.6007
1963	5	12	1963	5	18	670.179	-17.0397
1963	5	19	1963	5	25	671.624	-15.8556
1963	5	26	1963	6	1	671.903	-17.8425
1963	6	2	1963	6	8	684.04	-11.8505
1963	6	9	1963	6	15	684.235	-7.44791
1963	6	16	1963	6	22	678.277	-9.96725
1963	6	23	1963	6	29	682.447	-8.15877
1963	6	30	1963	7	6	691.603	-5.24399
1963	7	7	1963	7	13	686.712	-7.9951
1963	7	14	1963	7	20	679.32	-11.5925
1963	7	21	1963	7	27	681.27	-12.3344
1963	7	28	1963	8	3	679.935	-10.6109
1963	8	4	1963	8	10	684.151	-7.1174
1963	8	11	1963	8	17	687.618	-8.105
1963	8	18	1963	8	24	680.917	-10.0452
1963	8	25	1963	8	31	674.27	-12.5976
1963	9	1	1963	9	7	679.771	-12.5482
1963	9	8	1963	9	14	668.1	-15.1342
1963	9	15	1963	9	21	663.004	-19.3072
1963	9	22	1963	9	28	666.015	-17.4976
1963	9	29	1963	10	5	668.39	-15.7289
1963	10	6	1963	10	12	665.089	-18.5101
1963	10	13	1963	10	19	656.311	-21.3495
1963	10	20	1963	10	26	656.778	-19.7898
1963	10	27	1963	11	2	676.272	-12.2666
1963	11	3	1963	11	9	681.909	-15.5019
1963	11	10	1963	11	16	669.226	-26.549
1963	11	17	1963	11	23	662.574	-25.6649
1963	11	24	1963	11	30	651.018	-25.2991
1963	12	1	1963	12	7	674.234	-19.1143
1963	12	8	1963	12	14	675.028	-16.6929
1963	12	15	1963	12	21	677.478	-16.3412
1963	12	22	1963	12	28	655.397	-25.1084
1963	12	29	1964	1	4	659.079	-21.0649
1964	1	5	1964	1	11	652.073	-24.0761
1964	1	12	1964	1	18	680.878	-14.5968
1964	1	19	1964	1	25	669.485	-17.9567
1964	1	26	1964	2	1	652.151	-24.1545
1964	2	2	1964	2	8	666.447	-21.8934
1964	2	9	1964	2	15	665.635	-18.6979
1964	2	16	1964	2	22	678.176	-16.3961
1964	2	23	1964	2	29	666.686	-17.9291
1964	3	1	1964	3	7	674.4	-18.2004
1964	3	8	1964	3	14	662.48	-18.7226
1964	3	15	1964	3	21	664.068	-21.2144
1964	3	22	1964	3	28	651.179	-28.9811
1964	3	29	1964	4	4	676.787	-19.1655
1964	4	5	1964	4	11	661.727	-22.7095
1964	4	12	1964	4	18	667.903	-22.0196
1964	4	19	1964	4	25	686.228	-9.99818
1964	4	26	1964	5	2	672.28	-17.7047
1964	5	3	1964	5	9	669.034	-18.9577
1964	5	10	1964	5	16	671.289	-17.1303
1964	5	17	1964	5	23	677.051	-12.7451
1964	5	24	1964	5	30	684.282	-11.3471
1964	5	31	1964	6	6	686.819	-6.21604
1964	6	7	1964	6	13	679.425	-13.5086
1964	6	14	1964	6	20	680.286	-7.60344
1964	6	21	1964	6	27	669.057	-13.4431
1964	6	28	1964	7	4	682.1	-7.72037
1964	7	5	1964	7	11	677.401	-10.4034
1964	7	12	1964	7	18	673.507	-9.09322
1964	7	19	1964	7	25	672.758	-11.9021
1964	7	26	1964	8	1	673.034	-9.83984
1964	8	2	1964	8	8	685.725	-4.06822
1964	8	9	1964	8	15	697.787	-3.24995
1964	8	16	1964	8	22	684.27	-12.298
1964	8	23	1964	8	29	681.59	-11.8899
1964	8	30	1964	9	5	682.266	-9.30002
1964	9	6	1964	9	12	682.026	-9.07975
1964	9	13	1964	9	19	679.83	-13.729
1964	9	20	1964	9	26	677.759	-15.8278
1964	9	27	1964	10	3	663.461	-17.9751
1964	10	4	1964	10	10	665.482	-15.4489
1964	10	11	1964	10	17	674.19	-15.8067
1964	10	18	1964	10	24	667.482	-18.8749
1964	10	25	1964	10	31	668.562	-17.7884
1964	11	1	1964	11	7	677.111	-14.6928
1964	11	8	1964	11	14	663.783	-16.6631
1964	11	15	1964	11	21	662.204	-24.7889
1964	11	22	1964	11	28	664.487	-23.8212
1964	11	29	1964	12	5	662.588	-24.058
1964	12	6	1964	12	12	654.047	-25.623
1964	12	13	1964	12	19	665.423	-22.2643
1964	12	20	1964	12	26	671.161	-23.4166
1964	12	27	1965	1	2	662.753	-23.3128
1965	1	3	1965	1	9	663.221	-21.7807
1965	1	10	1965	1	16	653.566	-24.911
1965	1	17	1965	1	23	651.362	-27.813
1965	1	24	1965	1	30	676.469	-19.0332
1965	1	31	1965	2	6	678.744	-16.7829
1965	2	7	1965	2	13	667.364	-24.4971
1965	2	14	1965	2	20	675.36	-15.2247
1965	2	21	1965	2	27	692.966	-11.4803
1965	2	28	1965	3	6	676.127	-19.8189
1965	3	7	1965	3	13	665.173	-20.0553
1965	3	14	1965	3	20	674.682	-15.9286
1965	3	21	1965	3	27	670.064	-22.194
1965	3	28	1965	4	3	676.188	-15.6212
1965	4	4	1965	4	10	665.78	-18.3414
1965	4	11	1965	4	17	658.154	-26.3151
1965	4	18	1965	4	24	665.667	-19.1598
1965	4	25	1965	5	1	683.723	-16.0074
1965	5	2	1965	5	8	681.881	-15.348
1965	5	9	1965	5	15	682.924	-14.3419
1965	5	16	1965	5	22	681.009	-14.319
1965	5	23	1965	5	29	690.591	-8.98018
1965	5	30	1965	6	5	674.416	-12.6067
1965	6	6	1965	6	12	686.883	-8.8816
1965	6	13	1965	6	19	679.105	-11.3426
1965	6	20	1965	6	26	673.27	-12.8558
1965	6	27	1965	7	3	682.21	-9.25402
1965	7	4	1965	7	10	689.322	-3.439
1965	7	11	1965	7	17	682.278	-6.95614
1965	7	18	1965	7	24	688.281	-6.75396
1965	7	25	1965	7	31	684.06	-6.11785
1965	8	1	1965	8	7	685.412	-5.23264
1965	8	8	1965	8	14	684.87	-6.96938
1965	8	15	1965	8	21	679.451	-8.20054
1965	8	22	1965	8	28	675.447	-12.0244
1965	8	29	1965	9	4	677.475	-12.5353
1965	9	5	1965	9	11	683.04	-13.7357
1965	9	12	1965	9	18	672.196	-14.5434
1965	9	19	1965	9	25	669.445	-16.6107
1965	9	26	1965	10	2	675.815	-14.9607
1965	10	3	1965	10	9	681.742	-11.1024
1965	10	10	1965	10	16	670.356	-15.7875
1965	10	17	1965	10	23	664.952	-17.5945
1965	10	24	1965	10	30	659.358	-19.2401
1965	10	31	1965	11	6	668.763	-19.5015
1965	11	7	1965	11	13	679.486	-15.5245
1965	11	14	1965	11	20	690.637	-16.5035
1965	11	21	1965	11	27	680.075	-20.9131
1965	11	28	1965	12	4	667.295	-18.2998
1965	12	5	1965	12	11	664.688	-22.2892
1965	12	12	1965	12	18	657.277	-22.3469
1965	12	19	1965	12	25	668.98	-18.0279
1965	12	26	1966	1	1	664.21	-21.5459
1966	1	2	1966	1	8	654.283	-24.1132
1966	1	9	1966	1	15	683.463	-17.3446
1966	1	16	1966	1	22	674.432	-21.3665
1966	1	23	1966	1	29	669.935	-31.1598
1966	1	30	1966	2	5	672.519	-22.7869
1966	2	6	1966	2	12	668.384	-19.6637
1966	2	13	1966	2	19	678.117	-16.7806
1966	2	20	1966	2	26	670.02	-27.2797
1966	2	27	1966	3	5	665.277	-23.298
1966	3	6	1966	3	12	662.776	-26.2015
1966	3	13	1966	3	19	663.559	-24.9674
1966	3	20	1966	3	26	663.522	-28.866
1966	3	27	1966	4	2	671.464	-23.4317
1966	4	3	1966	4	9	673.135	-22.9939
1966	4	10	1966	4	16	677.469	-19.2842
1966	4	17	1966	4	23	672.723	-21.0017
1966	4	24	1966	4	30	671.346	-16.9825
1966	5	1	1966	5	7	675.267	-19.8319
1966	5	8	1966	5	14	668.522	-20.6703
1966	5	15	1966	5	21	672.219	-16.745
1966	5	22	1966	5	28	680.772	-14.3149
1966	5	29	1966	6	4	678.205	-12.3598
1966	6	5	1966	6	11	671.094	-14.3892
1966	6	12	1966	6	18	677.371	-11.9566
1966	6	19	1966	6	25	687.893	-6.98469
1966	6	26	1966	7	2	681.17	-7.54628
1966	7	3	1966	7	9	676.959	-6.95252
1966	7	10	1966	7	16	682.733	-6.15899
1966	7	17	1966	7	23	679.832	-7.78773
1966	7	24	1966	7	30	687.149	-5.77157
1966	7	31	1966	8	6	692.807	-3.57934
1966	8	7	1966	8	13	686.847	-7.30912
1966	8	14	1966	8	20	685.109	-7.58237
1966	8	21	1966	8	27	682.182	-9.51358
1966	8	28	1966	9	3	683.026	-12.4017
1966	9	4	1966	9	10	675.982	-15.2711
1966	9	11	1966	9	17	674.7	-12.9995
1966	9	18	1966	9	24	675.388	-11.1806
1966	9	25	1966	10	1	682.22	-7.81778
1966	10	2	1966	10	8	677.055	-14.8153
1966	10	9	1966	10	15	677.831	-12.9834
1966	10	16	1966	10	22	677.236	-17.4519
1966	10	23	1966	10	29	681.213	-12.6498
1966	10	30	1966	11	5	673.788	-18.6711
1966	11	6	1966	11	12	665.628	-20.4447
1966	11	13	1966	11	19	665.232	-26.0688
1966	11	20	1966	11	26	657.558	-26.9232
1966	11	27	1966	12	3	661.03	-27.5387
1966	12	4	1966	12	10	650.121	-28.2191
1966	12	11	1966	12	17	664.33	-24.4324
1966	12	18	1966	12	24	667.733	-23.4792
1966	12	25	1966	12	31	656.556	-25.0576
1967	1	1	1967	1	7	684.078	-14.1996
1967	1	8	1967	1	14	668.857	-17.0943
1967	1	15	1967	1	21	665.979	-22.2003
1967	1	22	1967	1	28	674.678	-20.3415
1967	1	29	1967	2	4	660.882	-21.806
1967	2	5	1967	2	11	653.615	-27.6014
1967	2	12	1967	2	18	659.054	-21.3307
1967	2	19	1967	2	25	660.209	-23.2995
1967	2	26	1967	3	4	647.94	-27.225
1967	3	5	1967	3	11	653.82	-28.24
1967	3	12	1967	3	18	657.209	-28.1432
1967	3	19	1967	3	25	657.289	-30.1872
1967	3	26	1967	4	1	670.188	-24.5726
1967	4	2	1967	4	8	669.23	-20.3046
1967	4	9	1967	4	15	661.809	-21.6903
1967	4	16	1967	4	22	666.871	-26.5327
1967	4	23	1967	4	29	663.226	-21.8039
1967	4	30	1967	5	6	679.451	-17.3427
1967	5	7	1967	5	13	687.353	-10.9998
1967	5	14	1967	5	20	679.335	-12.418
1967	5	21	1967	5	27	682.366	-13.9489
1967	5	28	1967	6	3	682.64	-14.459
1967	6	4	1967	6	10	673.83	-14.6523
1967	6	11	1967	6	17	679.262	-9.65597
1967	6	18	1967	6	24	672.944	-11.9794
1967	6	25	1967	7	1	677.026	-9.10396
1967	7	2	1967	7	8	677.274	-10.542
1967	7	9	1967	7	15	688.408	-5.98599
1967	7	16	1967	7	22	685.895	-3.7766
1967	7	23	1967	7	29	681.056	-8.49727
1967	7	30	1967	8	5	687.308	-4.73327
1967	8	6	1967	8	12	681.244	-8.9569
1967	8	13	1967	8	19	675.977	-9.72386
1967	8	20	1967	8	26	671.643	-15.2123
1967	8	27	1967	9	2	675.223	-12.9823
1967	9	3	1967	9	9	677.167	-7.65583
1967	9	10	1967	9	16	665.827	-16.6284
1967	9	17	1967	9	23	674.336	-13.4251
1967	9	24	1967	9	30	681.477	-7.18343
1967	10	1	1967	10	7	664.151	-16.4676
1967	10	8	1967	10	14	664.86	-18.8807
1967	10	15	1967	10	21	671.314	-19.1607
1967	10	22	1967	10	28	664.243	-22.4001
1967	10	29	1967	11	4	668.766	-24.6102
1967	11	5	1967	11	11	664.279	-22.7619
1967	11	12	1967	11	18	665.332	-19.8037
1967	11	19	1967	11	25	659.227	-22.2641
1967	11	26	1967	12	2	644.783	-30.9462
1967	12	3	1967	12	9	673.238	-23.1852
1967	12	10	1967	12	16	669.796	-19.3898
1967	12	17	1967	12	23	672.034	-14.4991
1967	12	24	1967	12	30	661.797	-24.1027
1967	12	31	1968	1	6	668.609	-27.1552
1968	1	7	1968	1	13	670.435	-20.5333
1968	1	14	1968	1	20	654.12	-22.3776
1968	1	21	1968	1	27	661.256	-26.6075
1968	1	28	1968	2	3	654.618	-30.9275
1968	2	4	1968	2	10	678.014	-18.289
1968	2	11	1968	2	17	668.457	-20.3281
1968	2	18	1968	2	24	673.702	-16.3024
1968	2	25	1968	3	2	649.095	-29.0782
1968	3	3	1968	3	9	669.636	-16.7788
1968	3	10	1968	3	16	660.872	-21.5572
1968	3	17	1968	3	23	654.412	-30.9553
1968	3	24	1968	3	30	659.3	-26.6258
1968	3	31	1968	4	6	684.672	-12.0801
1968	4	7	1968	4	13	671.944	-15.9281
1968	4	14	1968	4	20	677.337	-14.7658
1968	4	21	1968	4	27	668.507	-23.2537
1968	4	28	1968	5	4	684.37	-13.9794
1968	5	5	1968	5	11	678.887	-14.2308
1968	5	12	1968	5	18	690.172	-14.3759
1968	5	19	1968	5	25	683.682	-11.1905
1968	5	26	1968	6	1	679.397	-12.3669
1968	6	2	1968	6	8	678.561	-12.5448
1968	6	9	1968	6	15	676.577	-11.9029
1968	6	16	1968	6	22	687.573	-5.77457
1968	6	23	1968	6	29	677.904	-11.4051
1968	6	30	1968	7	6	689.572	-5.57338
1968	7	7	1968	7	13	690.321	-4.24915
1968	7	14	1968	7	20	688.964	-3.2693
1968	7	21	1968	7	27	685.141	-6.98763
1968	7	28	1968	8	3	678.9	-8.42536
1968	8	4	1968	8	10	687.13	-5.5083
1968	8	11	1968	8	17	686.407	-5.03042
1968	8	18	1968	8	24	678.766	-12.9829
1968	8	25	1968	8	31	680.121	-11.2227
1968	9	1	1968	9	7	677.843	-12.1354
1968	9	8	1968	9	14	690.434	-7.80996
1968	9	15	1968	9	21	681.325	-9.45904
1968	9	22	1968	9	28	673.293	-16.4212
1968	9	29	1968	10	5	680.587	-13.9437
1968	10	6	1968	10	12	684.949	-11.1383
1968	10	13	1968	10	19	672.627	-19.2556
1968	10	20	1968	10	26	675.803	-16.1862
1968	10	27	1968	11	2	679.586	-15.8986
1968	11	3	1968	11	9	675.997	-17.4084
1968	11	10	1968	11	16	670.274	-16.6097
1968	11	17	1968	11	23	665.578	-17.5615
1968	11	24	1968	11	30	667.324	-21.0254
1968	12	1	1968	12	7	666.38	-17.5448
1968	12	8	1968	12	14	657.333	-22.2204
1968	12	15	1968	12	21	668.154	-26.1047
1968	12	22	1968	12	28	679.671	-16.9398
1968	12	29	1969	1	4	677.241	-17.5531
1969	1	5	1969	1	11	686.879	-16.0992
1969	1	12	1969	1	18	669.873	-27.1367
1969	1	19	1969	1	25	674.743	-20.1879
1969	1	26	1969	2	1	662.895	-25.0172
1969	2	2	1969	2	8	669.664	-24.3448
1969	2	9	1969	2	15	682.196	-16.918
1969	2	16	1969	2	22	676.194	-17.9626
1969	2	23	1969	3	1	664.161	-24.2232
1969	3	2	1969	3	8	667.732	-27.0431
1969	3	9	1969	3	15	658.892	-23.3923
1969	3	16	1969	3	22	676.763	-21.3047
1969	3	23	1969	3	29	673.178	-18.3359
1969	3	30	1969	4	5	659.826	-25.8678
1969	4	6	1969	4	12	662.469	-24.5314
1969	4	13	1969	4	19	668.682	-20.7165
1969	4	20	1969	4	26	673.745	-18.9663
1969	4	27	1969	5	3	688.421	-12.3075
1969	5	4	1969	5	10	681.863	-16.1703
1969	5	11	1969	5	17	683.541	-11.3195
1969	5	18	1969	5	24	673.962	-16.0213
1969	5	25	1969	5	31	687.713	-10.0739
1969	6	1	1969	6	7	680.901	-8.50531
1969	6	8	1969	6	14	677.385	-12.2757
1969	6	15	1969	6	21	679.002	-11.2111
1969	6	22	1969	6	28	678.716	-11.083
1969	6	29	1969	7	5	679.059	-10.3954
1969	7	6	1969	7	12	679.821	-6.88838
1969	7	13	1969	7	19	678.365	-10.7399
1969	7	20	1969	7	26	674.246	-11.1801
1969	7	27	1969	8	2	681.86	-10.7385
1969	8	3	1969	8	9	684.635	-7.37411
1969	8	10	1969	8	16	683.097	-9.12774
1969	8	17	1969	8	23	685.221	-6.26519
1969	8	24	1969	8	30	676.289	-10.3545
1969	8	31	1969	9	6	678.45	-11.4435
1969	9	7	1969	9	13	672.652	-15.2161
1969	9	14	1969	9	20	668.591	-16.4318
1969	9	21	1969	9	27	662.483	-19.4961
1969	9	28	1969	10	4	670.623	-20.7284
1969	10	5	1969	10	11	667.707	-18.0464
1969	10	12	1969	10	18	662.63	-17.892
1969	10	19	1969	10	25	663.007	-19.0537
1969	10	26	1969	11	1	661.288	-25.8997
1969	11	2	1969	11	8	659.314	-25.6892
1969	11	9	1969	11	15	670.702	-19.0292
1969	11	16	1969	11	22	674.377	-17.4932
1969	11	23	1969	11	29	676.032	-15.9989
1969	11	30	1969	12	6	669.212	-20.5226
1969	12	7	1969	12	13	653.419	-29.3931
1969	12	14	1969	12	20	666.303	-21.1228
1969	12	21	1969	12	27	663.679	-23.159
1969	12	28	1970	1	3	675.678	-17.1208
1970	1	4	1970	1	10	665.488	-26.1396
1970	1	11	1970	1	17	667.513	-20.8902
1970	1	18	1970	1	24	657.086	-20.872
1970	1	25	1970	1	31	668.932	-20.4686
1970	2	1	1970	2	7	658.906	-25.2992
1970	2	8	1970	2	14	669.784	-24.8713
1970	2	15	1970	2	21	663.185	-25.9038
1970	2	22	1970	2	28	672.104	-24.0666
1970	3	1	1970	3	7	678.354	-21.2223
1970	3	8	1970	3	14	678.453	-17.0241
1970	3	15	1970	3	21	659.516	-23.4012
1970	3	22	1970	3	28	663.349	-24.432
1970	3	29	1970	4	4	673.1	-19.9264
1970	4	5	1970	4	11	685.534	-9.95543
1970	4	12	1970	4	18	662.587	-26.839
1970	4	19	1970	4	25	667.689	-25.0348
1970	4	26	1970	5	2	668.809	-15.5581
1970	5	3	1970	5	9	674.063	-17.9247
1970	5	10	1970	5	16	687.622	-10.7135
1970	5	17	1970	5	23	672.498	-14.8082
1970	5	24	1970	5	30	667.36	-18.797
1970	5	31	1970	6	6	670.889	-18.1299
1970	6	7	1970	6	13	681.115	-11.0036
1970	6	14	1970	6	20	678.467	-10.2498
1970	6	21	1970	6	27	676.437	-8.21
1970	6	28	1970	7	4	676.767	-8.36544
1970	7	5	1970	7	11	676.813	-8.25354
1970	7	12	1970	7	18	680.919	-8.25136
1970	7	19	1970	7	25	691.626	-1.88211
1970	7	26	1970	8	1	678.986	-9.05099
1970	8	2	1970	8	8	680.574	-6.47952
1970	8	9	1970	8	15	677.731	-11.2542
1970	8	16	1970	8	22	683.039	-6.3438
1970	8	23	1970	8	29	682.407	-9.0782
1970	8	30	1970	9	5	675.235	-15.6136
1970	9	6	1970	9	12	675.504	-14.9141
1970	9	13	1970	9	19	676.003	-12.1693
1970	9	20	1970	9	26	680.303	-11.8028
1970	9	27	1970	10	3	666.345	-15.0707
1970	10	4	1970	10	10	676.037	-13.5049
1970	10	11	1970	10	17	674.23	-13.25
1970	10	18	1970	10	24	672.017	-17.9055
1970	10	25	1970	10	31	673.587	-20.5786
1970	11	1	1970	11	7	670.764	-20.0264
1970	11	8	1970	11	14	663.053	-23.4487
1970	11	15	1970	11	21	667.263	-23.6745
1970	11	22	1970	11	28	680.573	-15.9354
1970	11	29	1970	12	5	661.133	-22.9348
1970	12	6	1970	12	12	660.26	-24.4323
1970	12	13	1970	12	19	657.901	-24.3314
1970	12	20	1970	12	26	681.549	-16.8471
1970	12	27	1971	1	2	684.139	-14.1453
1971	1	3	1971	1	9	659.414	-25.7594
1971	1	10	1971	1	16	667.437	-19.4706
1971	1	17	1971	1	23	650.477	-28.6586
1971	1	24	1971	1	30	669.907	-21.2488
1971	1	31	1971	2	6	661.311	-25.5138
1971	2	7	1971	2	13	653.668	-27.0904
1971	2	14	1971	2	20	658.1	-24.6492
1971	2	21	1971	2	27	659.58	-24.7452
1971	2	28	1971	3	6	670.005	-20.1086
1971	3	7	1971	3	13	674.88	-16.0711
1971	3	14	1971	3	20	671.014	-26.3776
1971	3	21	1971	3	27	663.334	-25.7355
1971	3	28	1971	4	3	669.632	-20.3571
1971	4	4	1971	4	10	659.624	-24.2512
1971	4	11	1971	4	17	668.129	-22.3104
1971	4	18	1971	4	24	683.904	-19.1752
1971	4	25	1971	5	1	679.522	-12.1588
1971	5	2	1971	5	8	669.735	-16.5243
1971	5	9	1971	5	15	674.663	-15.7499
1971	5	16	1971	5	22	670.506	-16.4367
1971	5	23	1971	5	29	677.718	-14.4399
1971	5	30	1971	6	5	682.544	-10.5435
1971	6	6	1971	6	12	698.517	-1.55271
1971	6	13	1971	6	19	685.49	-11.1386
1971	6	20	1971	6	26	683.63	-10.8178
1971	6	27	1971	7	3	679.494	-12.0635
1971	7	4	1971	7	10	678.139	-10.9493
1971	7	11	1971	7	17	689.585	-3.64149
1971	7	18	1971	7	24	688.448	-3.29845
1971	7	25	1971	7	31	682.917	-9.37981
1971	8	1	1971	8	7	679.302	-5.23386
1971	8	8	1971	8	14	680.558	-6.53163
1971	8	15	1971	8	21	672.264	-13.4639
1971	8	22	1971	8	28	675.347	-10.7206
1971	8	29	1971	9	4	667.901	-14.4737
1971	9	5	1971	9	11	675.672	-13.6436
1971	9	12	1971	9	18	678.705	-8.89421
1971	9	19	1971	9	25	675.708	-16.1896
1971	9	26	1971	10	2	674.152	-16.0447
1971	10	3	1971	10	9	671.61	-16.3695
1971	10	10	1971	10	16	667.363	-21.3
1971	10	17	1971	10	23	666.852	-19.476
1971	10	24	1971	10	30	665.516	-17.739
1971	10	31	1971	11	6	665.129	-19.899
1971	11	7	1971	11	13	671.448	-18.5967
1971	11	14	1971	11	20	669.495	-24.8934
1971	11	21	1971	11	27	666.328	-20.1461
1971	11	28	1971	12	4	660.158	-28.9496
1971	12	5	1971	12	11	661.249	-25.2613
1971	12	12	1971	12	18	649.613	-32.3485
1971	12	19	1971	12	25	646.095	-27.033
1971	12	26	1972	1	1	663.988	-23.3472
1972	1	2	1972	1	8	666.929	-18.2845
1972	1	9	1972	1	15	659.725	-20.6401
1972	1	16	1972	1	22	643.96	-26.7599
1972	1	23	1972	1	29	651.469	-27.7807
1972	1	30	1972	2	5	670.711	-22.7867
1972	2	6	1972	2	12	659.802	-22.7049
1972	2	13	1972	2	19	654.818	-27.7474
1972	2	20	1972	2	26	661.258	-23.3243
1972	2	27	1972	3	4	657.351	-21.5475
1972	3	5	1972	3	11	657.394	-24.5414
1972	3	12	1972	3	18	661.051	-26.9687
1972	3	19	1972	3	25	654.263	-28.8902
1972	3	26	1972	4	1	666.889	-23.3898
1972	4	2	1972	4	8	659.455	-27.0273
1972	4	9	1972	4	15	663.492	-24.835
1972	4	16	1972	4	22	681.687	-13.8455
1972	4	23	1972	4	29	678.279	-16.5233
1972	4	30	1972	5	6	677.264	-18.4197
1972	5	7	1972	5	13	682.088	-13.9306
1972	5	14	1972	5	20	673.417	-16.4356
1972	5	21	1972	5	27	678.03	-12.3602
1972	5	28	1972	6	3	673.628	-16.8248
1972	6	4	1972	6	10	680.435	-9.99628
1972	6	11	1972	6	17	674.497	-11.9637
1972	6	18	1972	6	24	671.106	-12.6997
1972	6	25	1972	7	1	678.427	-11.7511
1972	7	2	1972	7	8	681.034	-6.51341
1972	7	9	1972	7	15	676.066	-10.7755
1972	7	16	1972	7	22	683.348	-7.21688
1972	7	23	1972	7	29	680.753	-7.36141
1972	7	30	1972	8	5	687.462	-5.63207
1972	8	6	1972	8	12	681.401	-5.44951
1972	8	13	1972	8	19	671.455	-10.9755
1972	8	20	1972	8	26	672.552	-13.7673
1972	8	27	1972	9	2	677.234	-11.6707
1972	9	3	1972	9	9	684.675	-10.3995
1972	9	10	1972	9	16	678.961	-10.1663
1972	9	17	1972	9	23	675.499	-13.2012
1972	9	24	1972	9	30	674.075	-13.2029
1972	10	1	1972	10	7	669.873	-19.7771
1972	10	8	1972	10	14	663.129	-20.7065
1972	10	15	1972	10	21	679.4	-14.974
1972	10	22	1972	10	28	667.191	-22.6389
1972	10	29	1972	11	4	659.283	-19.734
1972	11	5	1972	11	11	663.84	-23.9439
1972	11	12	1972	11	18	671.815	-26.1664
1972	11	19	1972	11	25	666.199	-21.4246
1972	11	26	1972	12	2	656.257	-22.4772
1972	12	3	1972	12	9	660.176	-24.4028
1972	12	10	1972	12	16	658.841	-23.7846
1972	12	17	1972	12	23	653.772	-23.8791
1972	12	24	1972	12	30	645.744	-30.4414
1972	12	31	1973	1	6	655.617	-28.1755
1973	1	7	1973	1	13	664.54	-18.1821
1973	1	14	1973	1	20	650.386	-24.8081
1973	1	21	1973	1	27	660.121	-22.039
1973	1	28	1973	2	3	658.094	-23.9117
1973	2	4	1973	2	10	654.858	-27.8166
1973	2	11	1973	2	17	647.914	-32.5483
1973	2	18	1973	2	24	657.165	-29.8249
1973	2	25	1973	3	3	658.742	-24.1558
1973	3	4	1973	3	10	662.337	-23.8447
1973	3	11	1973	3	17	676.724	-16.1098
1973	3	18	1973	3	24	658.71	-25.2805
1973	3	25	1973	3	31	653.452	-27.2532
1973	4	1	1973	4	7	666.035	-25.8445
1973	4	8	1973	4	14	681.706	-9.99608
1973	4	15	1973	4	21	676.653	-17.7145
1973	4	22	1973	4	28	687.874	-13.1108
1973	4	29	1973	5	5	676.601	-15.9893
1973	5	6	1973	5	12	671.573	-21.4405
1973	5	13	1973	5	19	676.31	-16.3531
1973	5	20	1973	5	26	683.44	-13.4587
1973	5	27	1973	6	2	678.927	-12.5817
1973	6	3	1973	6	9	669.837	-15.7808
1973	6	10	1973	6	16	680.883	-13.893
1973	6	17	1973	6	23	681.054	-9.09879
1973	6	24	1973	6	30	676.721	-9.96282
1973	7	1	1973	7	7	675.716	-13.0963
1973	7	8	1973	7	14	679.875	-5.62982
1973	7	15	1973	7	21	685.334	-4.31965
1973	7	22	1973	7	28	681.602	-6.1928
1973	7	29	1973	8	4	679.046	-10.6145
1973	8	5	1973	8	11	676.908	-9.73879
1973	8	12	1973	8	18	682.666	-8.85023
1973	8	19	1973	8	25	687.441	-5.62915
1973	8	26	1973	9	1	677.286	-10.4119
1973	9	2	1973	9	8	678.86	-10.8871
1973	9	9	1973	9	15	682.222	-6.19963
1973	9	16	1973	9	22	672.856	-13.2059
1973	9	23	1973	9	29	667.497	-16.3526
1973	9	30	1973	10	6	675.259	-13.4606
1973	10	7	1973	10	13	688.156	-8.57396
1973	10	14	1973	10	20	677.114	-11.8813
1973	10	21	1973	10	27	662.44	-21.1115
1973	10	28	1973	11	3	667.322	-21.8878
1973	11	4	1973	11	10	665.699	-17.9849
1973	11	11	1973	11	17	664.619	-26.7051
1973	11	18	1973	11	24	668.517	-23.9318
1973	11	25	1973	12	1	681.529	-11.772
1973	12	2	1973	12	8	666.153	-22.805
1973	12	9	1973	12	15	659.07	-28.0416
1973	12	16	1973	12	22	669.814	-26.6532
1973	12	23	1973	12	29	653.217	-26.0617
1973	12	30	1974	1	5	660.037	-24.2548
1974	1	6	1974	1	12	650.326	-21.4786
1974	1	13	1974	1	19	653.296	-24.4191
1974	1	20	1974	1	26	647.682	-26.005
1974	1	27	1974	2	2	659.024	-24.6384
1974	2	3	1974	2	9	669.71	-23.9656
1974	2	10	1974	2	16	663.823	-23.9687
1974	2	17	1974	2	23	655.87	-24.7551
1974	2	24	1974	3	2	648.235	-28.1247
1974	3	3	1974	3	9	657.038	-24.0927
1974	3	10	1974	3	16	673.466	-16.8599
1974	3	17	1974	3	23	665.494	-21.7614
1974	3	24	1974	3	30	665.146	-23.826
1974	3	31	1974	4	6	663.49	-23.3864
1974	4	7	1974	4	13	674.057	-18.5064
1974	4	14	1974	4	20	673.779	-16.9474
1974	4	21	1974	4	27	672.899	-17.1347
1974	4	28	1974	5	4	679.152	-16.7295
1974	5	5	1974	5	11	682.91	-14.6536
1974	5	12	1974	5	18	678.684	-13.8302
1974	5	19	1974	5	25	680.012	-11.687
1974	5	26	1974	6	1	672.282	-17.9078
1974	6	2	1974	6	8	676.759	-14.1378
1974	6	9	1974	6	15	672.995	-15.0894
1974	6	16	1974	6	22	683.461	-10.8187
1974	6	23	1974	6	29	687.55	-5.87538
1974	6	30	1974	7	6	685.896	-6.23323
1974	7	7	1974	7	13	685.313	-7.45826
1974	7	14	1974	7	20	675.617	-7.64886
1974	7	21	1974	7	27	680.707	-5.14015
1974	7	28	1974	8	3	687.326	-7.06895
1974	8	4	1974	8	10	680.696	-8.8593
1974	8	11	1974	8	17	685.853	-6.31374
1974	8	18	1974	8	24	682.488	-12.7296
1974	8	25	1974	8	31	675.363	-14.3331
1974	9	1	1974	9	7	676.627	-10.3037
1974	9	8	1974	9	14	669.143	-16.3672
1974	9	15	1974	9	21	670.817	-17.5896
1974	9	22	1974	9	28	675.591	-18.4088
1974	9	29	1974	10	5	681.224	-13.8681
1974	10	6	1974	10	12	683.797	-13.1256
1974	10	13	1974	10	19	661.238	-17.8493
1974	10	20	1974	10	26	670.471	-19.3268
1974	10	27	1974	11	2	673.072	-18.3757
1974	11	3	1974	11	9	660.089	-20.1372
1974	11	10	1974	11	16	669.378	-21.7861
1974	11	17	1974	11	23	669.677	-17.4354
1974	11	24	1974	11	30	659.672	-24.3293
1974	12	1	1974	12	7	650.761	-27.2049
1974	12	8	1974	12	14	656.663	-26.8341
1974	12	15	1974	12	21	655.071	-32.9564
1974	12	22	1974	12	28	653.665	-28.6886
1974	12	29	1975	1	4	642.533	-31.4078
1975	1	5	1975	1	11	662.472	-27.1874
1975	1	12	1975	1	18	655.752	-30.0496
1975	1	19	1975	1	25	653.676	-27.5513
1975	1	26	1975	2	1	653.404	-26.5636
1975	2	2	1975	2	8	668.287	-21.188
1975	2	9	1975	2	15	668.785	-18.7991
1975	2	16	1975	2	22	640.2	-28.1942
1975	2	23	1975	3	1	666.371	-21.614
1975	3	2	1975	3	8	655.227	-27.4036
1975	3	9	1975	3	15	661.763	-26.4935
1975	3	16	1975	3	22	662.781	-21.697
1975	3	23	1975	3	29	675.902	-17.15
1975	3	30	1975	4	5	682.849	-10.6301
1975	4	6	1975	4	12	673.156	-23.8941
1975	4	13	1975	4	19	670.556	-17.782
1975	4	20	1975	4	26	668.082	-19.0266
1975	4	27	1975	5	3	673.234	-21.8747
1975	5	4	1975	5	10	671.352	-19.9546
1975	5	11	1975	5	17	671.586	-17.494
1975	5	18	1975	5	24	689.081	-7.86776
1975	5	25	1975	5	31	695.231	-4.7309
1975	6	1	1975	6	7	686.28	-12.7044
1975	6	8	1975	6	14	682.519	-8.7044
1975	6	15	1975	6	21	676.378	-14.573
1975	6	22	1975	6	28	677.955	-11.6628
1975	6	29	1975	7	5	677.357	-7.73414
1975	7	6	1975	7	12	683.136	-5.28207
1975	7	13	1975	7	19	672.474	-9.43912
1975	7	20	1975	7	26	676.454	-10.2052
1975	7	27	1975	8	2	678.607	-11.1789
1975	8	3	1975	8	9	686.813	-6.7891
1975	8	10	1975	8	16	690.022	-4.78019
1975	8	17	1975	8	23	680.393	-6.85385
1975	8	24	1975	8	30	675.991	-8.31526
1975	8	31	1975	9	6	676.632	-9.40282
1975	9	7	1975	9	13	675.709	-12.7496
1975	9	14	1975	9	20	663.783	-18.4118
1975	9	21	1975	9	27	669.447	-16.7411
1975	9	28	1975	10	4	670.009	-18.1128
1975	10	5	1975	10	11	680.021	-12.0487
1975	10	12	1975	10	18	672.687	-16.8446
1975	10	19	1975	10	25	675.808	-13.3391
1975	10	26	1975	11	1	670.99	-15.1554
1975	11	2	1975	11	8	655.32	-19.4649
1975	11	9	1975	11	15	665.335	-23.6639
1975	11	16	1975	11	22	669.932	-16.7333
1975	11	23	1975	11	29	660.242	-23.754
1975	11	30	1975	12	6	665.801	-24.1036
1975	12	7	1975	12	13	665.029	-24.7333
1975	12	14	1975	12	20	661.046	-24.9038
1975	12	21	1975	12	27	651.792	-27.9821
1975	12	28	1976	1	3	654.61	-34.7222
1976	1	4	1976	1	10	656.088	-26.1932
1976	1	11	1976	1	17	660.335	-26.3107
1976	1	18	1976	1	24	656.433	-27.0642
1976	1	25	1976	1	31	660.53	-24.8355
1976	2	1	1976	2	7	653.715	-26.6032
1976	2	8	1976	2	14	641.896	-27.637
1976	2	15	1976	2	21	649.211	-29.9786
1976	2	22	1976	2	28	653.242	-28.2346
1976	2	29	1976	3	6	656.927	-26.4162
1976	3	7	1976	3	13	661.72	-23.3527
1976	3	14	1976	3	20	657.388	-23.6031
1976	3	21	1976	3	27	637.143	-29.5184
1976	3	28	1976	4	3	662.156	-26.2225
1976	4	4	1976	4	10	661.576	-24.6213
1976	4	11	1976	4	17	661.024	-23.6251
1976	4	18	1976	4	24	677.065	-17.2484
1976	4	25	1976	5	1	681.158	-13.8953
1976	5	2	1976	5	8	666.174	-22.3491
1976	5	9	1976	5	15	670.752	-17.8642
1976	5	16	1976	5	22	675.497	-15.7241
1976	5	23	1976	5	29	682.314	-13.3959
1976	5	30	1976	6	5	683.905	-10.8597
1976	6	6	1976	6	12	674.381	-14.4742
1976	6	13	1976	6	19	678.465	-12.5787
1976	6	20	1976	6	26	679.005	-9.50089
1976	6	27	1976	7	3	676.537	-10.8512
1976	7	4	1976	7	10	687.724	-5.86144
1976	7	11	1976	7	17	680.687	-5.27064
1976	7	18	1976	7	24	681.31	-5.70837
1976	7	25	1976	7	31	685.065	-7.32218
1976	8	1	1976	8	7	672.327	-8.24445
1976	8	8	1976	8	14	668.941	-15.0509
1976	8	15	1976	8	21	675.001	-14.0524
1976	8	22	1976	8	28	676.543	-8.87175
1976	8	29	1976	9	4	683.507	-7.24517
1976	9	5	1976	9	11	682.165	-11.8311
1976	9	12	1976	9	18	682.038	-7.34129
1976	9	19	1976	9	25	688.579	-7.6826
1976	9	26	1976	10	2	674.59	-14.4144
1976	10	3	1976	10	9	664.083	-15.6453
1976	10	10	1976	10	16	663.747	-18.3757
1976	10	17	1976	10	23	671.281	-18.2334
1976	10	24	1976	10	30	673.019	-17.8428
1976	10	31	1976	11	6	666.711	-18.7917
1976	11	7	1976	11	13	670.341	-15.9695
1976	11	14	1976	11	20	662.373	-21.7458
1976	11	21	1976	11	27	664.978	-19.8634
1976	11	28	1976	12	4	657.498	-25.5262
1976	12	5	1976	12	11	659.376	-25.2443
1976	12	12	1976	12	18	665.888	-23.7537
1976	12	19	1976	12	25	686.819	-13.9477
1976	12	26	1977	1	1	673.533	-21.8182
1977	1	2	1977	1	8	657.186	-25.9609
1977	1	9	1977	1	15	685.744	-21.8457
1977	1	16	1977	1	22	674.247	-24.3517
1977	1	23	1977	1	29	670.058	-21.9801
1977	1	30	1977	2	5	667.526	-23.4949
1977	2	6	1977	2	12	669.474	-19.3019
1977	2	13	1977	2	19	662.609	-22.3328
1977	2	20	1977	2	26	675.825	-20.4679
1977	2	27	1977	3	5	671.773	-15.6856
1977	3	6	1977	3	12	656.184	-21.269
1977	3	13	1977	3	19	670.094	-18.591
1977	3	20	1977	3	26	684.843	-14.6685
1977	3	27	1977	4	2	673.429	-17.5322
1977	4	3	1977	4	9	673.155	-17.3718
1977	4	10	1977	4	16	667.675	-24.3162
1977	4	17	1977	4	23	667.439	-21.9174
1977	4	24	1977	4	30	673.766	-19.0658
1977	5	1	1977	5	7	687.44	-9.26945
1977	5	8	1977	5	14	677.843	-11.4593
1977	5	15	1977	5	21	671.27	-16.1417
1977	5	22	1977	5	28	685.472	-12.5386
1977	5	29	1977	6	4	678.837	-11.0688
1977	6	5	1977	6	11	685.528	-7.28884
1977	6	12	1977	6	18	683.151	-8.58091
1977	6	19	1977	6	25	676.368	-11.5906
1977	6	26	1977	7	2	680.986	-12.2434
1977	7	3	1977	7	9	685.515	-8.62297
1977	7	10	1977	7	16	686.651	-6.17969
1977	7	17	1977	7	23	680.93	-9.39948
1977	7	24	1977	7	30	678.386	-8.26187
1977	7	31	1977	8	6	681.49	-10.8373
1977	8	7	1977	8	13	682.837	-10.3887
1977	8	14	1977	8	20	689.267	-8.09267
1977	8	21	1977	8	27	683.267	-12.599
1977	8	28	1977	9	3	668.44	-16.829
1977	9	4	1977	9	10	672.221	-16.6954
1977	9	11	1977	9	17	680.46	-12.9678
1977	9	18	1977	9	24	677.606	-14.5666
1977	9	25	1977	10	1	669.02	-15.9434
1977	10	2	1977	10	8	675.406	-16.4196
1977	10	9	1977	10	15	674.913	-17.1785
1977	10	16	1977	10	22	668.986	-15.1318
1977	10	23	1977	10	29	659.128	-20.4608
1977	10	30	1977	11	5	656.339	-22.212
1977	11	6	1977	11	12	659.34	-22.2206
1977	11	13	1977	11	19	670.846	-20.2703
1977	11	20	1977	11	26	673.754	-15.842
1977	11	27	1977	12	3	663.849	-19.4032
1977	12	4	1977	12	10	665.553	-18.6054
1977	12	11	1977	12	17	658.185	-25.1388
1977	12	18	1977	12	24	659.073	-29.9423
1977	12	25	1977	12	31	661.979	-24.9438
1978	1	1	1978	1	7	654.291	-29.0344
1978	1	8	1978	1	14	654.808	-27.6488
1978	1	15	1978	1	21	655.946	-25.8331
1978	1	22	1978	1	28	664.508	-23.8719
1978	1	29	1978	2	4	665.837	-23.8407
1978	2	5	1978	2	11	682.572	-17.5609
1978	2	12	1978	2	18	676.923	-21.583
1978	2	19	1978	2	25	664.703	-21.542
1978	2	26	1978	3	4	660.224	-26.9426
1978	3	5	1978	3	11	662.724	-20.5389
1978	3	12	1978	3	18	660.494	-22.9852
1978	3	19	1978	3	25	652.436	-24.1428
1978	3	26	1978	4	1	663.415	-24.3607
1978	4	2	1978	4	8	670.972	-20.2541
1978	4	9	1978	4	15	674.613	-19.6988
1978	4	16	1978	4	22	679.682	-15.2395
1978	4	23	1978	4	29	687.404	-11.8573
1978	4	30	1978	5	6	676.231	-15.1646
1978	5	7	1978	5	13	678.634	-14.1293
1978	5	14	1978	5	20	667.904	-19.6289
1978	5	21	1978	5	27	673.144	-17.5587
1978	5	28	1978	6	3	672.725	-17.4991
1978	6	4	1978	6	10	673.568	-15.7688
1978	6	11	1978	6	17	677.697	-13.0834
1978	6	18	1978	6	24	677.589	-12.8217
1978	6	25	1978	7	1	679.106	-11.309
1978	7	2	1978	7	8	690.694	-6.43966
1978	7	9	1978	7	15	688.563	-4.78838
1978	7	16	1978	7	22	688.105	-4.11099
1978	7	23	1978	7	29	683.017	-5.13739
1978	7	30	1978	8	5	682.832	-7.66646
1978	8	6	1978	8	12	683.96	-6.48843
1978	8	13	1978	8	19	680.064	-9.34763
1978	8	20	1978	8	26	681.775	-7.51497
1978	8	27	1978	9	2	685.084	-8.67074
1978	9	3	1978	9	9	682.139	-10.0859
1978	9	10	1978	9	16	669.144	-17.0367
1978	9	17	1978	9	23	674.451	-11.4724
1978	9	24	1978	9	30	673.563	-17.0401
1978	10	1	1978	10	7	671.647	-19.236
1978	10	8	1978	10	14	674.092	-12.2418
1978	10	15	1978	10	21	664.86	-20.1402
1978	10	22	1978	10	28	660.363	-21.473
1978	10	29	1978	11	4	654.516	-21.7411
1978	11	5	1978	11	11	651.365	-24.4523
1978	11	12	1978	11	18	651.974	-27.5898
1978	11	19	1978	11	25	657.605	-29.0059
1978	11	26	1978	12	2	665.188	-19.5806
1978	12	3	1978	12	9	671.29	-17.6936
1978	12	10	1978	12	16	668.359	-16.0448
1978	12	17	1978	12	23	677.76	-15.224
1978	12	24	1978	12	30	684.341	-12.8581
1978	12	31	1979	1	6	661.003	-27.5065
1979	1	7	1979	1	13	661.373	-29.4316
1979	1	14	1979	1	20	675.408	-23.0155
1979	1	21	1979	1	27	685.768	-14.487
1979	1	28	1979	2	3	660.601	-25.2409
1979	2	4	1979	2	10	667.978	-18.786
1979	2	11	1979	2	17	669.342	-17.5943
1979	2	18	1979	2	24	659.883	-24.0411
1979	2	25	1979	3	3	644.632	-30.1196
1979	3	4	1979	3	10	646.763	-31.4075
1979	3	11	1979	3	17	681.453	-17.8932
1979	3	18	1979	3	24	671.259	-22.5205
1979	3	25	1979	3	31	664.27	-22.9607
1979	4	1	1979	4	7	681.958	-19.0632
1979	4	8	1979	4	14	687.99	-18.6827
1979	4	15	1979	4	21	673.61	-16.6658
1979	4	22	1979	4	28	672.523	-18.5952
1979	4	29	1979	5	5	681.53	-17.5846
1979	5	6	1979	5	12	679.909	-19.3033
1979	5	13	1979	5	19	674.435	-19.2287
1979	5	20	1979	5	26	678.067	-14.8607
1979	5	27	1979	6	2	675.322	-14.3465
1979	6	3	1979	6	9	680.621	-9.56958
1979	6	10	1979	6	16	669.574	-13.5886
1979	6	17	1979	6	23	675.354	-13.0185
1979	6	24	1979	6	30	678.872	-9.6962
1979	7	1	1979	7	7	675.488	-11.184
1979	7	8	1979	7	14	674.646	-11.645
1979	7	15	1979	7	21	684.28	-6.74593
1979	7	22	1979	7	28	689.085	-3.35228
1979	7	29	1979	8	4	684.729	-7.18962
1979	8	5	1979	8	11	678.71	-8.59499
1979	8	12	1979	8	18	673.892	-10.5539
1979	8	19	1979	8	25	687.61	-4.71939
1979	8	26	1979	9	1	684.987	-9.77979
1979	9	2	1979	9	8	678.886	-16.1678
1979	9	9	1979	9	15	672.431	-16.9406
1979	9	16	1979	9	22	668.75	-15.3011
1979	9	23	1979	9	29	668.367	-18.7188
1979	9	30	1979	10	6	678.083	-13.5322
1979	10	7	1979	10	13	684.016	-9.81116
1979	10	14	1979	10	20	667.315	-17.7741
1979	10	21	1979	10	27	657.604	-19.8122
1979	10	28	1979	11	3	660.344	-23.0234
1979	11	4	1979	11	10	662.521	-24.2319
1979	11	11	1979	11	17	662.248	-24.6702
1979	11	18	1979	11	24	662.077	-22.3346
1979	11	25	1979	12	1	656.843	-24.3494
1979	12	2	1979	12	8	654.245	-25.1275
1979	12	9	1979	12	15	656.144	-21.6524
1979	12	16	1979	12	22	654.798	-26.3742
1979	12	23	1979	12	29	662.042	-24.2259
1979	12	30	1980	1	5	669.358	-18.3189
1980	1	6	1980	1	12	661.223	-23.399
1980	1	13	1980	1	19	666.513	-20.1396
1980	1	20	1980	1	26	682.903	-20.2399
1980	1	27	1980	2	2	678.546	-13.1227
1980	2	3	1980	2	9	665.677	-22.8524
1980	2	10	1980	2	16	667.07	-18.7334
1980	2	17	1980	2	23	650.906	-23.8941
1980	2	24	1980	3	1	658.969	-26.745
1980	3	2	1980	3	8	654.917	-25.8613
1980	3	9	1980	3	15	654.186	-24.9049
1980	3	16	1980	3	22	686.242	-14.3335
1980	3	23	1980	3	29	672.924	-22.0477
1980	3	30	1980	4	5	669.072	-21.415
1980	4	6	1980	4	12	665.566	-24.5797
1980	4	13	1980	4	19	663.875	-22.2954
1980	4	20	1980	4	26	669.377	-22.6899
1980	4	27	1980	5	3	673.405	-19.1942
1980	5	4	1980	5	10	685.785	-16.9737
1980	5	11	1980	5	17	680.135	-13.7495
1980	5	18	1980	5	24	684.315	-9.52857
1980	5	25	1980	5	31	687.178	-7.30728
1980	6	1	1980	6	7	680.544	-9.45175
1980	6	8	1980	6	14	686.945	-5.14295
1980	6	15	1980	6	21	678.195	-9.7098
1980	6	22	1980	6	28	684.875	-9.27827
1980	6	29	1980	7	5	683.522	-9.56662
1980	7	6	1980	7	12	687.839	-8.95876
1980	7	13	1980	7	19	683.968	-7.88339
1980	7	20	1980	7	26	680.117	-10.1508
1980	7	27	1980	8	2	689.775	-5.13634
1980	8	3	1980	8	9	683.625	-9.97348
1980	8	10	1980	8	16	676.274	-11.623
1980	8	17	1980	8	23	684.83	-8.96248
1980	8	24	1980	8	30	685.474	-8.38158
1980	8	31	1980	9	6	677.865	-11.632
1980	9	7	1980	9	13	677.207	-11.4698
1980	9	14	1980	9	20	676.731	-12.3655
1980	9	21	1980	9	27	671.595	-13.9376
1980	9	28	1980	10	4	662.235	-20.3265
1980	10	5	1980	10	11	672.46	-21.6314
1980	10	12	1980	10	18	685.224	-13.8718
1980	10	19	1980	10	25	679.487	-12.1218
1980	10	26	1980	11	1	661.891	-19.6049
1980	11	2	1980	11	8	680.47	-14.9862
1980	11	9	1980	11	15	675.627	-18.7182
1980	11	16	1980	11	22	666.098	-24.5634
1980	11	23	1980	11	29	670.246	-22.834
1980	11	30	1980	12	6	679.609	-14.1766
1980	12	7	1980	12	13	666.404	-18.1502
1980	12	14	1980	12	20	656.197	-25.5155
1980	12	21	1980	12	27	652.079	-27.7285
1980	12	28	1981	1	3	651.864	-33.7247
1981	1	4	1981	1	10	666.439	-25.502
1981	1	11	1981	1	17	659.254	-27.2135
1981	1	18	1981	1	24	657.562	-27.0566
1981	1	25	1981	1	31	660.366	-22.2274
1981	2	1	1981	2	7	648.748	-27.7605
1981	2	8	1981	2	14	656.595	-29.5318
1981	2	15	1981	2	21	654.11	-28.6131
1981	2	22	1981	2	28	664.5	-25.1576
1981	3	1	1981	3	7	676.197	-23.3582
1981	3	8	1981	3	14	659.953	-26.1062
1981	3	15	1981	3	21	676.31	-23.1792
1981	3	22	1981	3	28	662.668	-25.098
1981	3	29	1981	4	4	662.966	-21.3408
1981	4	5	1981	4	11	657.001	-24.7703
1981	4	12	1981	4	18	678.367	-17.6843
1981	4	19	1981	4	25	690.372	-10.8985
1981	4	26	1981	5	2	673.97	-16.2721
1981	5	3	1981	5	9	673.768	-22.4214
1981	5	10	1981	5	16	673.901	-17.291
1981	5	17	1981	5	23	678.262	-11.6549
1981	5	24	1981	5	30	684.475	-10.2494
1981	5	31	1981	6	6	686.325	-5.51891
1981	6	7	1981	6	13	676.625	-15.2669
1981	6	14	1981	6	20	681.842	-11.9623
1981	6	21	1981	6	27	686.591	-5.83343
1981	6	28	1981	7	4	680.679	-9.95743
1981	7	5	1981	7	11	680.807	-8.3066
1981	7	12	1981	7	18	682.232	-7.91252
1981	7	19	1981	7	25	680.606	-4.75657
1981	7	26	1981	8	1	683.697	-5.59249
1981	8	2	1981	8	8	679.721	-7.68564
1981	8	9	1981	8	15	678.614	-8.33686
1981	8	16	1981	8	22	679.399	-9.26634
1981	8	23	1981	8	29	674.119	-10.7241
1981	8	30	1981	9	5	679.311	-13.7007
1981	9	6	1981	9	12	681.988	-12.4745
1981	9	13	1981	9	19	681.258	-9.35475
1981	9	20	1981	9	26	675.019	-14.3834
1981	9	27	1981	10	3	686.869	-11.7055
1981	10	4	1981	10	10	682.49	-20.1329
1981	10	11	1981	10	17	669.054	-21.9609
1981	10	18	1981	10	24	669	-16.2467
1981	10	25	1981	10	31	667.369	-22.5353
1981	11	1	1981	11	7	671.934	-17.7006
1981	11	8	1981	11	14	660.63	-22.9108
1981	11	15	1981	11	21	659.424	-29.1566
1981	11	22	1981	11	28	670.968	-25.1611
1981	11	29	1981	12	5	675.13	-14.4406
1981	12	6	1981	12	12	672.627	-29.3811
1981	12	13	1981	12	19	666.882	-28.0239
1981	12	20	1981	12	26	661.099	-24.4696
1981	12	27	1982	1	2	680.762	-20.6895
1982	1	3	1982	1	9	678.73	-16.5878
1982	1	10	1982	1	16	652.706	-26.1746
1982	1	17	1982	1	23	666.833	-25.098
1982	1	24	1982	1	30	665.663	-21.0837
1982	1	31	1982	2	6	659.15	-23.8653
1982	2	7	1982	2	13	647.281	-25.0688
1982	2	14	1982	2	20	663.074	-22.8825
1982	2	21	1982	2	27	659.48	-22.8875
1982	2	28	1982	3	6	654.818	-24.5511
1982	3	7	1982	3	13	644.056	-27.1239
1982	3	14	1982	3	20	676.019	-16.8209
1982	3	21	1982	3	27	658.032	-24.3392
1982	3	28	1982	4	3	662.071	-21.5551
1982	4	4	1982	4	10	679.862	-12.0738
1982	4	11	1982	4	17	665.554	-18.0587
1982	4	18	1982	4	24	655.964	-23.4444
1982	4	25	1982	5	1	668.309	-24.9358
1982	5	2	1982	5	8	676.884	-18.8829
1982	5	9	1982	5	15	680.675	-16.54
1982	5	16	1982	5	22	683.228	-13.329
1982	5	23	1982	5	29	677.237	-14.8336
1982	5	30	1982	6	5	680.659	-13.2366
1982	6	6	1982	6	12	692.632	-8.30933
1982	6	13	1982	6	19	688.089	-11.1221
1982	6	20	1982	6	26	684.622	-8.40635
1982	6	27	1982	7	3	682.164	-9.68422
1982	7	4	1982	7	10	679.927	-12.3532
1982	7	11	1982	7	17	679.401	-9.81905
1982	7	18	1982	7	24	679.136	-6.95994
1982	7	25	1982	7	31	678.708	-7.90478
1982	8	1	1982	8	7	687.219	-6.69387
1982	8	8	1982	8	14	674.876	-11.9329
1982	8	15	1982	8	21	679.948	-9.74816
1982	8	22	1982	8	28	678.24	-11.3886
1982	8	29	1982	9	4	674.903	-15.6009
1982	9	5	1982	9	11	670.918	-19.1416
1982	9	12	1982	9	18	664.8	-18.8345
1982	9	19	1982	9	25	672.793	-15.358
1982	9	26	1982	10	2	668.354	-15.6445
1982	10	3	1982	10	9	681.824	-10.0773
1982	10	10	1982	10	16	676.326	-14.9837
1982	10	17	1982	10	23	663.276	-18.5848
1982	10	24	1982	10	30	664.041	-20.8916
1982	10	31	1982	11	6	668.194	-19.0748
1982	11	7	1982	11	13	653.509	-24.0391
1982	11	14	1982	11	20	657.001	-25.4665
1982	11	21	1982	11	27	662.159	-25.8251
1982	11	28	1982	12	4	651.536	-27.2036
1982	12	5	1982	12	11	665.2	-20.4084
1982	12	12	1982	12	18	657.718	-26.1127
1982	12	19	1982	12	25	653.9	-26.4785
1982	12	26	1983	1	1	642.085	-30.8113
1983	1	2	1983	1	8	637.383	-31.9581
1983	1	9	1983	1	15	653.394	-28.6368
1983	1	16	1983	1	22	655.418	-30.4425
1983	1	23	1983	1	29	647.855	-29.1087
1983	1	30	1983	2	5	665.635	-27.8226
1983	2	6	1983	2	12	677.276	-14.3351
1983	2	13	1983	2	19	667.33	-23.5412
1983	2	20	1983	2	26	656.465	-23.2813
1983	2	27	1983	3	5	644.31	-27.7392
1983	3	6	1983	3	12	664.404	-23.3968
1983	3	13	1983	3	19	652.955	-27.4492
1983	3	20	1983	3	26	664.33	-24.2582
1983	3	27	1983	4	2	670.069	-21.3962
1983	4	3	1983	4	9	671.348	-23.1599
1983	4	10	1983	4	16	663.748	-23.3871
1983	4	17	1983	4	23	679.749	-17.7443
1983	4	24	1983	4	30	682.47	-12.1553
1983	5	1	1983	5	7	673.448	-14.087
1983	5	8	1983	5	14	675.317	-16.4332
1983	5	15	1983	5	21	684.023	-12.4727
1983	5	22	1983	5	28	690.045	-11.1872
1983	5	29	1983	6	4	683.829	-12.684
1983	6	5	1983	6	11	671.781	-14.7695
1983	6	12	1983	6	18	677.216	-14.1072
1983	6	19	1983	6	25	678.513	-9.64399
1983	6	26	1983	7	2	679.724	-5.5813
1983	7	3	1983	7	9	672.39	-9.83431
1983	7	10	1983	7	16	683.718	-7.39029
1983	7	17	1983	7	23	679.766	-8.75147
1983	7	24	1983	7	30	677.46	-9.17104
1983	7	31	1983	8	6	676.46	-9.36312
1983	8	7	1983	8	13	676.679	-10.8355
1983	8	14	1983	8	20	673.236	-10.651
1983	8	21	1983	8	27	675.746	-12.4157
1983	8	28	1983	9	3	671.428	-19.1148
1983	9	4	1983	9	10	679.991	-13.2873
1983	9	11	1983	9	17	677.597	-10.489
1983	9	18	1983	9	24	674.469	-14.4136
1983	9	25	1983	10	1	682.817	-15.4533
1983	10	2	1983	10	8	669.446	-17.4013
1983	10	9	1983	10	15	666.424	-21.6957
1983	10	16	1983	10	22	666.428	-23.1538
1983	10	23	1983	10	29	666.343	-19.2779
1983	10	30	1983	11	5	657.882	-25.2201
1983	11	6	1983	11	12	676.291	-15.929
1983	11	13	1983	11	19	678.604	-12.5681
1983	11	20	1983	11	26	667.693	-21.833
1983	11	27	1983	12	3	660.529	-24.8702
1983	12	4	1983	12	10	672.703	-21.2073
1983	12	11	1983	12	17	663.234	-23.4934
1983	12	18	1983	12	24	668.298	-21.1822
1983	12	25	1983	12	31	644.807	-27.5663
1984	1	1	1984	1	7	652.892	-28.2221
1984	1	8	1984	1	14	637.3	-34.0802
1984	1	15	1984	1	21	654.073	-29.6491
1984	1	22	1984	1	28	658.034	-26.8648
1984	1	29	1984	2	4	651.412	-25.1657
1984	2	5	1984	2	11	651.711	-27.3021
1984	2	12	1984	2	18	649.631	-30.6753
1984	2	19	1984	2	25	655.407	-26.9362
1984	2	26	1984	3	3	660.026	-31.8368
1984	3	4	1984	3	10	667.641	-21.2087
1984	3	11	1984	3	17	678.497	-21.9162
1984	3	18	1984	3	24	661.362	-27.3536
1984	3	25	1984	3	31	672.511	-23.9059
1984	4	1	1984	4	7	664.75	-22.593
1984	4	8	1984	4	14	664.219	-25.0057
1984	4	15	1984	4	21	664.723	-23.834
1984	4	22	1984	4	28	670.294	-17.5963
1984	4	29	1984	5	5	672.45	-20.4759
1984	5	6	1984	5	12	680.038	-13.5459
1984	5	13	1984	5	19	674.22	-18.8737
1984	5	20	1984	5	26	671.563	-13.2687
1984	5	27	1984	6	2	673.391	-14.0393
1984	6	3	1984	6	9	690.963	-9.02891
1984	6	10	1984	6	16	679.208	-11.0641
1984	6	17	1984	6	23	673.379	-13.4897
1984	6	24	1984	6	30	687.429	-4.54825
1984	7	1	1984	7	7	686.96	-6.09523
1984	7	8	1984	7	14	680.504	-7.80119
1984	7	15	1984	7	21	684.488	-5.87667
1984	7	22	1984	7	28	683.542	-5.43549
1984	7	29	1984	8	4	681.674	-7.83222
1984	8	5	1984	8	11	672.744	-9.66968
1984	8	12	1984	8	18	674.242	-8.74398
1984	8	19	1984	8	25	683.978	-7.1811
1984	8	26	1984	9	1	679.896	-7.95713
1984	9	2	1984	9	8	681.957	-4.27648
1984	9	9	1984	9	15	666.989	-17.1729
1984	9	16	1984	9	22	677.492	-15.0099
1984	9	23	1984	9	29	675.669	-12.794
1984	9	30	1984	10	6	671.947	-17.5615
1984	10	7	1984	10	13	669.976	-19.1792
1984	10	14	1984	10	20	667.519	-19.4504
1984	10	21	1984	10	27	664.285	-22.6413
1984	10	28	1984	11	3	669.625	-19.825
1984	11	4	1984	11	10	676.779	-17.4853
1984	11	11	1984	11	17	669.656	-17.7426
1984	11	18	1984	11	24	665.476	-19.7966
1984	11	25	1984	12	1	648.309	-25.5212
1984	12	2	1984	12	8	661.198	-22.127
1984	12	9	1984	12	15	653.93	-23.0239
1984	12	16	1984	12	22	647.281	-28.0789
1984	12	23	1984	12	29	657.337	-25.013
1984	12	30	1985	1	5	672.995	-22.4694
1985	1	6	1985	1	12	672.009	-16.5967
1985	1	13	1985	1	19	682.287	-20.1853
1985	1	20	1985	1	26	668.937	-23.517
1985	1	27	1985	2	2	664.897	-22.6466
1985	2	3	1985	2	9	678.379	-17.9468
1985	2	10	1985	2	16	669.147	-21.1339
1985	2	17	1985	2	23	652.396	-26.3429
1985	2	24	1985	3	2	662.005	-21.8296
1985	3	3	1985	3	9	657.373	-23.7503
1985	3	10	1985	3	16	670.52	-21.7799
1985	3	17	1985	3	23	661.96	-22.9059
1985	3	24	1985	3	30	675.191	-20.9374
1985	3	31	1985	4	6	669.565	-24.1858
1985	4	7	1985	4	13	667.014	-19.9837
1985	4	14	1985	4	20	675.433	-18.1906
1985	4	21	1985	4	27	682.635	-12.5273
1985	4	28	1985	5	4	672.602	-18.3994
1985	5	5	1985	5	11	673.655	-17.7175
1985	5	12	1985	5	18	685.572	-11.4217
1985	5	19	1985	5	25	690.236	-7.94621
1985	5	26	1985	6	1	680.403	-14.9858
1985	6	2	1985	6	8	685.234	-10.0769
1985	6	9	1985	6	15	682.565	-8.23088
1985	6	16	1985	6	22	680.586	-9.82086
1985	6	23	1985	6	29	686.157	-11.2221
1985	6	30	1985	7	6	678.115	-11.1634
1985	7	7	1985	7	13	681.654	-9.72944
1985	7	14	1985	7	20	677.263	-10.3404
1985	7	21	1985	7	27	687.135	-5.97623
1985	7	28	1985	8	3	680.895	-9.03465
1985	8	4	1985	8	10	681.701	-9.30644
1985	8	11	1985	8	17	686.273	-4.22475
1985	8	18	1985	8	24	682.996	-9.25175
1985	8	25	1985	8	31	684.45	-9.64886
1985	9	1	1985	9	7	685.672	-14.809
1985	9	8	1985	9	14	675.379	-12.8902
1985	9	15	1985	9	21	669.877	-16.1546
1985	9	22	1985	9	28	680.724	-10.2021
1985	9	29	1985	10	5	667.026	-16.4509
1985	10	6	1985	10	12	663.065	-19.5435
1985	10	13	1985	10	19	669.528	-15.7982
1985	10	20	1985	10	26	667.886	-18.9701
1985	10	27	1985	11	2	679.343	-13.7697
1985	11	3	1985	11	9	667.796	-22.1118
1985	11	10	1985	11	16	655.824	-23.0441
1985	11	17	1985	11	23	671.044	-19.5133
1985	11	24	1985	11	30	684.466	-12.562
1985	12	1	1985	12	7	677.84	-17.6708
1985	12	8	1985	12	14	664.88	-21.7848
1985	12	15	1985	12	21	667.007	-23.7594
1985	12	22	1985	12	28	672.748	-26.801
1985	12	29	1986	1	4	666.137	-22.0386
1986	1	5	1986	1	11	664.755	-22.0085
1986	1	12	1986	1	18	659.268	-25.1499
1986	1	19	1986	1	25	652.931	-27.8603
1986	1	26	1986	2	1	661.194	-27.1257
1986	2	2	1986	2	8	675.096	-22.5389
1986	2	9	1986	2	15	667.16	-21.8544
1986	2	16	1986	2	22	684.467	-16.8201
1986	2	23	1986	3	1	683.235	-16.8387
1986	3	2	1986	3	8	651.76	-24.4955
1986	3	9	1986	3	15	645.321	-26.3446
1986	3	16	1986	3	22	644.268	-27.9831
1986	3	23	1986	3	29	659.373	-23.0677
1986	3	30	1986	4	5	669.721	-20.8593
1986	4	6	1986	4	12	685.465	-17.7463
1986	4	13	1986	4	19	671.547	-19.4544
1986	4	20	1986	4	26	670.94	-16.8957
1986	4	27	1986	5	3	673.733	-19.1389
1986	5	4	1986	5	10	686.275	-11.1328
1986	5	11	1986	5	17	670	-19.8696
1986	5	18	1986	5	24	670.079	-15.5033
1986	5	25	1986	5	31	670.628	-18.0588
1986	6	1	1986	6	7	670.576	-16.5724
1986	6	8	1986	6	14	673.284	-13.7021
1986	6	15	1986	6	21	679.3	-9.79093
1986	6	22	1986	6	28	679.383	-9.33392
1986	6	29	1986	7	5	684.941	-6.57588
1986	7	6	1986	7	12	682.267	-8.44913
1986	7	13	1986	7	19	677.409	-9.82523
1986	7	20	1986	7	26	680.689	-5.11639
1986	7	27	1986	8	2	682.682	-9.17129
1986	8	3	1986	8	9	678.417	-7.99001
1986	8	10	1986	8	16	687.222	-7.67923
1986	8	17	1986	8	23	688.809	-4.91433
1986	8	24	1986	8	30	684.917	-9.29416
1986	8	31	1986	9	6	674.406	-11.4771
1986	9	7	1986	9	13	695.249	-2.75167
1986	9	14	1986	9	20	679.651	-9.84677
1986	9	21	1986	9	27	676.334	-14.8043
1986	9	28	1986	10	4	667.078	-17.2851
1986	10	5	1986	10	11	663.343	-15.7875
1986	10	12	1986	10	18	651.656	-22.4311
1986	10	19	1986	10	25	656.137	-22.0165
1986	10	26	1986	11	1	662.669	-22.5652
1986	11	2	1986	11	8	656.777	-25.009
1986	11	9	1986	11	15	662.428	-22.5592
1986	11	16	1986	11	22	656.363	-23.8386
1986	11	23	1986	11	29	658.808	-26.7174
1986	11	30	1986	12	6	658.568	-28.2386
1986	12	7	1986	12	13	647.265	-25.7632
1986	12	14	1986	12	20	659.1	-23.9936
1986	12	21	1986	12	27	653.962	-27.1882
1986	12	28	1987	1	3	668.248	-21.1495
1987	1	4	1987	1	10	666.42	-19.4348
1987	1	11	1987	1	17	668.465	-19.1428
1987	1	18	1987	1	24	666.777	-19.9124
1987	1	25	1987	1	31	672.994	-13.8781
1987	2	1	1987	2	7	651.321	-26.448
1987	2	8	1987	2	14	670.729	-20.4586
1987	2	15	1987	2	21	676.241	-16.3513
1987	2	22	1987	2	28	664.7	-24.6984
1987	3	1	1987	3	7	657.974	-24.6799
1987	3	8	1987	3	14	668.602	-22.168
1987	3	15	1987	3	21	667.076	-30.3678
1987	3	22	1987	3	28	669.602	-25.3248
1987	3	29	1987	4	4	671.105	-21.5057
1987	4	5	1987	4	11	663.535	-21.8946
1987	4	12	1987	4	18	657.633	-25.4545
1987	4	19	1987	4	25	658.631	-20.9406
1987	4	26	1987	5	2	664.519	-22.1018
1987	5	3	1987	5	9	673.433	-17.209
1987	5	10	1987	5	16	670.379	-16.4844
1987	5	17	1987	5	23	685.091	-10.8476
1987	5	24	1987	5	30	688.539	-11.5918
1987	5	31	1987	6	6	684.466	-11.0088
1987	6	7	1987	6	13	690.583	-5.28574
1987	6	14	1987	6	20	683.462	-4.07104
1987	6	21	1987	6	27	690.798	-6.21615
1987	6	28	1987	7	4	681.701	-11.7841
1987	7	5	1987	7	11	682.58	-10.1725
1987	7	12	1987	7	18	679.902	-7.65283
1987	7	19	1987	7	25	684.133	-7.89223
1987	7	26	1987	8	1	679.903	-7.25578
1987	8	2	1987	8	8	693.295	-3.98933
1987	8	9	1987	8	15	691.457	-6.15744
1987	8	16	1987	8	22	683.898	-9.04177
1987	8	23	1987	8	29	680.322	-10.4754
1987	8	30	1987	9	5	680.06	-14.5094
1987	9	6	1987	9	12	676.467	-12.318
1987	9	13	1987	9	19	677.94	-15.8277
1987	9	20	1987	9	26	676.2	-12.9561
1987	9	27	1987	10	3	668.268	-13.9156
1987	10	4	1987	10	10	662.405	-20.9576
1987	10	11	1987	10	17	669.907	-16.842
1987	10	18	1987	10	24	672.19	-20.3069
1987	10	25	1987	10	31	667.057	-18.1766
1987	11	1	1987	11	7	670.955	-16.8286
1987	11	8	1987	11	14	665.435	-20.1849
1987	11	15	1987	11	21	667.286	-19.952
1987	11	22	1987	11	28	669.397	-17.9328
1987	11	29	1987	12	5	672.547	-19.5439
1987	12	6	1987	12	12	672.701	-16.3426
1987	12	13	1987	12	19	664.165	-19.4299
1987	12	20	1987	12	26	663.862	-19.8884
1987	12	27	1988	1	2	661.457	-20.5874
1988	1	3	1988	1	9	657.302	-26.5533
1988	1	10	1988	1	16	661.35	-23.8294
1988	1	17	1988	1	23	655.191	-28.8808
1988	1	24	1988	1	30	663.008	-25.3968
1988	1	31	1988	2	6	665.47	-23.0953
1988	2	7	1988	2	13	654.394	-26.574
1988	2	14	1988	2	20	663.361	-24.5258
1988	2	21	1988	2	27	672.42	-21.7894
1988	2	28	1988	3	5	677.177	-14.247
1988	3	6	1988	3	12	662.771	-24.2807
1988	3	13	1988	3	19	663.887	-25.9023
1988	3	20	1988	3	26	668.634	-19.516
1988	3	27	1988	4	2	668.597	-23.8842
1988	4	3	1988	4	9	667.143	-27.0885
1988	4	10	1988	4	16	675.048	-26.4538
[truncated: 1,706 more rows]

## Sheet: Boundary layer height(h)
year	month	BLH	Unit: m
1950	1	587.987
1950	2	403.325
1950	3	291.389
1950	4	276.22
1950	5	332.845
1950	6	205.038
1950	7	327.48
1950	8	108.227
1950	9	189.109
1950	10	145.654
1950	11	326.415
1950	12	212.942
1951	1	234.354
1951	2	236.126
1951	3	390.982
1951	4	210.547
1951	5	261.569
1951	6	188.093
1951	7	176.837
1951	8	271.58
1951	9	176.206
1951	10	187.131
1951	11	195.296
1951	12	241.775
1952	1	361.402
1952	2	335.532
1952	3	295.741
1952	4	202.857
1952	5	244.926
1952	6	131.648
1952	7	226.949
1952	8	84.2947
1952	9	201.19
1952	10	386.273
1952	11	172.692
1952	12	182.048
1953	1	289.653
1953	2	292.593
1953	3	304.261
1953	4	172.893
1953	5	125.967
1953	6	313.744
1953	7	147.496
1953	8	163.266
1953	9	238.865
1953	10	215.078
1953	11	318.415
1953	12	298.961
1954	1	514.001
1954	2	463.542
1954	3	258.79
1954	4	400.77
1954	5	212.172
1954	6	176.127
1954	7	128.744
1954	8	150.287
1954	9	103.675
1954	10	224.847
1954	11	471.033
1954	12	209.288
1955	1	273.655
1955	2	134.421
1955	3	272.278
1955	4	312.747
1955	5	287.113
1955	6	196.595
1955	7	251.132
1955	8	176.239
1955	9	237.322
1955	10	171.804
1955	11	211.726
1955	12	107.73
1956	1	242.029
1956	2	447.961
1956	3	303.208
1956	4	136.833
1956	5	234.148
1956	6	144.896
1956	7	130.011
1956	8	101.358
1956	9	163.278
1956	10	263.237
1956	11	268.055
1956	12	605.169
1957	1	658.309
1957	2	155.249
1957	3	187.031
1957	4	292.497
1957	5	273.826
1957	6	107.92
1957	7	121.984
1957	8	144.259
1957	9	104.443
1957	10	244.218
1957	11	286.065
1957	12	218.043
1958	1	345.171
1958	2	278.517
1958	3	375.337
1958	4	313.365
1958	5	117.092
1958	6	134.709
1958	7	95.211
1958	8	49.8257
1958	9	247.32
1958	10	260.407
1958	11	266.843
1958	12	295.36
1959	1	136.387
1959	2	467.838
1959	3	378.237
1959	4	137.305
1959	5	236.801
1959	6	183.958
1959	7	125.932
1959	8	95.9762
1959	9	361.129
1959	10	455.983
1959	11	299.309
1959	12	366.987
1960	1	420.812
1960	2	245.069
1960	3	388.753
1960	4	210.946
1960	5	323.125
1960	6	227.891
1960	7	59.0914
1960	8	98.8884
1960	9	255.66
1960	10	102.749
1960	11	302.45
1960	12	279.016
1961	1	370.859
1961	2	270.601
1961	3	280.466
1961	4	153.996
1961	5	255.116
1961	6	186.68
1961	7	237.807
1961	8	186.587
1961	9	227.538
1961	10	284.173
1961	11	195.603
1961	12	174.941
1962	1	285.616
1962	2	277.613
1962	3	109.859
1962	4	395.522
1962	5	132.84
1962	6	152.526
1962	7	190.003
1962	8	164.897
1962	9	164.931
1962	10	138.268
1962	11	215.616
1962	12	272.566
1963	1	266.856
1963	2	218.469
1963	3	264.481
1963	4	212.958
1963	5	235.425
1963	6	203.742
1963	7	178.486
1963	8	103.485
1963	9	280.239
1963	10	251.232
1963	11	179.771
1963	12	190.461
1964	1	364.545
1964	2	323.622
1964	3	525.983
1964	4	127.438
1964	5	240.262
1964	6	180.7
1964	7	186.111
1964	8	66.7995
1964	9	92.9317
1964	10	278.138
1964	11	261.162
1964	12	250.891
1965	1	224.036
1965	2	442.135
1965	3	198.961
1965	4	231.351
1965	5	109.712
1965	6	148.317
1965	7	98.5388
1965	8	131.037
1965	9	99.4421
1965	10	208.349
1965	11	235.175
1965	12	91.8541
1966	1	194.596
1966	2	148.329
1966	3	251.186
1966	4	242.335
1966	5	102.658
1966	6	145.763
1966	7	194.007
1966	8	116.502
1966	9	148.862
1966	10	142.78
1966	11	219.065
1966	12	239.889
1967	1	261.269
1967	2	439.228
1967	3	210.788
1967	4	285.521
1967	5	171.994
1967	6	241.896
1967	7	131.248
1967	8	132.991
1967	9	250.762
1967	10	111.358
1967	11	173.071
1967	12	151.663
1968	1	191.685
1968	2	229.892
1968	3	345.151
1968	4	153.992
1968	5	174.028
1968	6	144.288
1968	7	116.37
1968	8	139.835
1968	9	260.41
1968	10	98.0139
1968	11	305.07
1968	12	242.49
1969	1	231.551
1969	2	228.205
1969	3	107.78
1969	4	223.171
1969	5	211.253
1969	6	274.205
1969	7	227.983
1969	8	299.331
1969	9	141.113
1969	10	100.916
1969	11	284.956
1969	12	344.332
1970	1	301.197
1970	2	363.326
1970	3	206.286
1970	4	205.698
1970	5	307.349
1970	6	253.307
1970	7	145.568
1970	8	113.938
1970	9	209.306
1970	10	225.919
1970	11	227.333
1970	12	224.006
1971	1	166.593
1971	2	197.976
1971	3	162.346
1971	4	160.003
1971	5	218.705
1971	6	174.76
1971	7	99.5632
1971	8	131.742
1971	9	168.303
1971	10	90.4199
1971	11	234.158
1971	12	201.03
1972	1	704.61
1972	2	325.019
1972	3	382.96
1972	4	221.195
1972	5	400.841
1972	6	225.515
1972	7	209.9
1972	8	190.769
1972	9	272.213
1972	10	223.929
1972	11	187.14
1972	12	263.014
1973	1	495.965
1973	2	185.938
1973	3	242.434
1973	4	340.708
1973	5	174.891
1973	6	158.941
1973	7	140.804
1973	8	177.547
1973	9	257.732
1973	10	136.459
1973	11	105.215
1973	12	163.279
1974	1	507.714
1974	2	279.654
1974	3	337.052
1974	4	311.43
1974	5	222.029
1974	6	284.554
1974	7	107.1
1974	8	133.645
1974	9	121.072
1974	10	224.95
1974	11	273.613
1974	12	198.304
1975	1	227.905
1975	2	375.453
1975	3	328.288
1975	4	271.478
1975	5	164.245
1975	6	209.049
1975	7	223.454
1975	8	192.255
1975	9	168.572
1975	10	162.405
1975	11	237.519
1975	12	277.998
1976	1	248.74
1976	2	425.829
1976	3	572.761
1976	4	237.382
1976	5	279.763
1976	6	241.631
1976	7	146.324
1976	8	203.42
1976	9	283.675
1976	10	500.969
1976	11	202.689
1976	12	273.921
1977	1	156.516
1977	2	225.025
1977	3	159.512
1977	4	171.687
1977	5	205.963
1977	6	221.18
1977	7	152.482
1977	8	278.237
1977	9	208.547
1977	10	107.635
1977	11	175.575
1977	12	293.619
1978	1	462.545
1978	2	150.075
1978	3	220.85
1978	4	254.425
1978	5	292.363
1978	6	227.168
1978	7	144.911
1978	8	235.864
1978	9	158.737
1978	10	245.656
1978	11	135.068
1978	12	359.511
1979	1	250.071
1979	2	267.337
1979	3	194.062
1979	4	249.87
1979	5	123.097
1979	6	239.679
1979	7	116.568
1979	8	84.3495
1979	9	111.696
1979	10	253.178
1979	11	303.494
1979	12	441.102
1980	1	325.6
1980	2	271.768
1980	3	346.938
1980	4	310.642
1980	5	257.026
1980	6	189.585
1980	7	196.618
1980	8	120.115
1980	9	139.674
1980	10	127.481
1980	11	217.099
1980	12	180.205
1981	1	181.758
1981	2	281.509
1981	3	196.473
1981	4	323.095
1981	5	200.475
1981	6	181.531
1981	7	164.853
1981	8	177.507
1981	9	230.738
1981	10	148.01
1981	11	161.48
1981	12	181.221
1982	1	147.571
1982	2	484.553
1982	3	324.958
1982	4	230.735
1982	5	90.509
1982	6	122.783
1982	7	184.872
1982	8	182.448
1982	9	141.598
1982	10	233.069
1982	11	256.865
1982	12	306.034
1983	1	342.989
1983	2	381.791
1983	3	228.97
1983	4	260.483
1983	5	124.02
1983	6	178.278
1983	7	259.945
1983	8	141.606
1983	9	193.185
1983	10	155.706
1983	11	229.458
1983	12	183.012
1984	1	360.549
1984	2	471.401
1984	3	338.842
1984	4	310.301
1984	5	277.118
1984	6	217.436
1984	7	124.595
1984	8	268.077
1984	9	270.715
1984	10	401.651
1984	11	149.61
1984	12	439.002
1985	1	192.302
1985	2	303.272
1985	3	250.466
1985	4	184.836
1985	5	302.708
1985	6	153.178
1985	7	147.625
1985	8	172.175
1985	9	86.051
1985	10	212.642
1985	11	381.494
1985	12	83.6177
1986	1	352.089
1986	2	261.891
1986	3	355.664
1986	4	424.123
1986	5	187.162
1986	6	244.273
1986	7	88.6242
1986	8	182.656
1986	9	172.29
1986	10	282.174
1986	11	213.554
1986	12	410.233
1987	1	494.681
1987	2	320.171
1987	3	458.319
1987	4	379.1
1987	5	297.747
1987	6	116.926
1987	7	146.223
1987	8	67.6755
1987	9	179.766
1987	10	171.073
1987	11	263.928
1987	12	191.508
1988	1	227.969
1988	2	195.51
1988	3	146.06
1988	4	149.13
1988	5	336.722
1988	6	222.38
1988	7	160.685
1988	8	240.218
1988	9	132.07
1988	10	126.61
1988	11	197.583
1988	12	175.372
1989	1	328.057
1989	2	293.127
1989	3	385.897
1989	4	254.965
1989	5	246.826
1989	6	170.13
1989	7	202.686
1989	8	258.836
1989	9	207.513
1989	10	200.914
1989	11	245.386
1989	12	270.083
1990	1	226.448
1990	2	254.39
1990	3	223.841
1990	4	181.573
1990	5	205.861
1990	6	343.144
1990	7	158.518
1990	8	198.872
1990	9	222.453
1990	10	219.11
1990	11	205.926
1990	12	356.485
1991	1	327.38
1991	2	430.41
1991	3	280.868
1991	4	155.743
1991	5	288.063
1991	6	114.489
1991	7	90.0122
1991	8	173.47
1991	9	139.025
1991	10	244.504
1991	11	176.999
1991	12	286.075
1992	1	332.955
1992	2	450.801
1992	3	239.229
1992	4	275.581
1992	5	247.252
1992	6	308.823
1992	7	106.078
1992	8	173.32
1992	9	270.141
1992	10	317.569
1992	11	398.197
1992	12	247.922
1993	1	295.759
1993	2	353.633
1993	3	416.187
1993	4	276.757
1993	5	223.203
1993	6	162.364
1993	7	91.9523
1993	8	172.879
1993	9	168.687
1993	10	211.705
1993	11	406.463
1993	12	279.326
1994	1	302.884
1994	2	491.103
1994	3	240.13
1994	4	244.125
1994	5	191.13
1994	6	197.11
1994	7	66.8173
1994	8	178.597
1994	9	210.259
1994	10	84.721
1994	11	171.288
1994	12	217.692
1995	1	220.768
1995	2	203.702
1995	3	235.144
1995	4	131.243
1995	5	134.129
1995	6	256.316
1995	7	178.07
1995	8	179.561
1995	9	269.093
1995	10	97.1277
1995	11	233.619
1995	12	321.964
1996	1	350.681
1996	2	528.166
1996	3	513.791
1996	4	282.631
1996	5	169.408
1996	6	142.064
1996	7	228.58
1996	8	154.091
1996	9	332.789
1996	10	243.624
1996	11	264.91
1996	12	285.703
1997	1	347.434
1997	2	413.484
1997	3	290.779
1997	4	323.454
1997	5	155.388
1997	6	179.045
1997	7	235.893
1997	8	162.537
1997	9	183.894
1997	10	163.276
1997	11	250.065
1997	12	326.807
1998	1	333.103
1998	2	341.556
1998	3	293.505
1998	4	199.928
1998	5	232.97
1998	6	113.815
1998	7	143.942
1998	8	172.603
1998	9	94.0239
1998	10	101.027
1998	11	435.495
1998	12	307.423
1999	1	259.56
1999	2	281.273
1999	3	166.845
1999	4	141.562
1999	5	313.452
1999	6	213.276
1999	7	109.599
1999	8	167.943
1999	9	209.245
1999	10	227.632
1999	11	284.27
1999	12	251.395
2000	1	417.526
2000	2	353.058
2000	3	245.686
2000	4	168.23
2000	5	271.627
2000	6	128.88
2000	7	153.303
2000	8	184.181
2000	9	273.11
2000	10	243.599
2000	11	200.141
2000	12	129.328
2001	1	333.703
2001	2	309.267
2001	3	240.033
2001	4	124.465
2001	5	204.021
2001	6	170.325
2001	7	152.21
2001	8	133.505
2001	9	161.103
2001	10	102.997
2001	11	349.605
2001	12	327.154
2002	1	353.652
2002	2	210.565
2002	3	239.237
2002	4	240.893
2002	5	227.703
2002	6	234.767
2002	7	208.182
2002	8	137.133
2002	9	217.388
2002	10	277.206
2002	11	366.458
2002	12	368.02
2003	1	218.166
2003	2	486.05
2003	3	332.899
2003	4	386.825
2003	5	175.462
2003	6	210.639
2003	7	246.46
2003	8	103.573
2003	9	248.942
2003	10	210.132
2003	11	237.016
2003	12	163.812
2004	1	156.286
2004	2	316.202
2004	3	440.904
2004	4	299.481
2004	5	182.717
2004	6	155.259
2004	7	267.247
2004	8	134.764
2004	9	206.747
2004	10	166.881
2004	11	187.017
2004	12	212.771
2005	1	401.569
2005	2	301.258
2005	3	353.115
2005	4	260.87
2005	5	186.574
2005	6	179.535
2005	7	223.799
2005	8	176.87
2005	9	73.5295
2005	10	114.83
2005	11	224.013
2005	12	298.082
2006	1	238.49
2006	2	201.661
2006	3	174.589
2006	4	247.028
2006	5	200.661
2006	6	215.763
2006	7	173.411
2006	8	171.392
2006	9	158.16
2006	10	159.247
2006	11	172.316
2006	12	367.803
2007	1	301.213
2007	2	177.34
2007	3	338.912
2007	4	362.441
2007	5	171.708
2007	6	249.08
2007	7	150.446
2007	8	77.1857
2007	9	209.171
2007	10	203.61
2007	11	329.65
2007	12	408.489
2008	1	298.985
2008	2	223.157
2008	3	241.967
2008	4	178.431
2008	5	261.18
2008	6	248.269
2008	7	250.286
2008	8	235.86
2008	9	320.926
2008	10	283.656
2008	11	343.249
2008	12	426.339
2009	1	352.566
2009	2	146.821
2009	3	239.538
2009	4	312.015
2009	5	295.986
2009	6	99.4596
2009	7	188.271
2009	8	191.432
2009	9	162.951
2009	10	141.089
2009	11	139.738
2009	12	321.761
2010	1	337.605
2010	2	207.456
2010	3	196.945
2010	4	140.838
2010	5	164.684
2010	6	186.797
2010	7	106.808
2010	8	137.832
2010	9	304.446
2010	10	172.198
2010	11	76.727
2010	12	298.442
2011	1	248.121
2011	2	414.211
2011	3	202.198
2011	4	438.903
2011	5	202.275
2011	6	165.549
2011	7	169.04
2011	8	78.2844
2011	9	206.022
2011	10	156.206
2011	11	271.95
2011	12	187.925
2012	1	313.519
2012	2	238.087
2012	3	430.208
2012	4	198.138
2012	5	134.258
2012	6	134.933
2012	7	99.9173
2012	8	104.12
2012	9	138.781
2012	10	286.247
2012	11	187.766
2012	12	224.036
2013	1	449.618
2013	2	277.843
2013	3	187.57
2013	4	182.668
2013	5	372.742
2013	6	202.99
2013	7	133.868
2013	8	168.116
2013	9	186.024
2013	10	98.2864
2013	11	276.567
2013	12	264.714
2014	1	509.217
2014	2	381.073
2014	3	311.214
2014	4	232.071
2014	5	202.166
2014	6	160.912
2014	7	135.061
2014	8	151.855
2014	9	281.977
2014	10	118.11
2014	11	370.655
2014	12	298.701
2015	1	310.077
2015	2	352.707
2015	3	407.822
2015	4	238.712
2015	5	345.548
2015	6	153.467
2015	7	167.021
2015	8	136.243
2015	9	310.618
2015	10	265.476
2015	11	160.09
2015	12	323.849
2016	1	369.069
2016	2	229.226
2016	3	238.784
2016	4	233.215
2016	5	195.62
2016	6	183.927
2016	7	89.1258
2016	8	127.769
2016	9	106.432
2016	10	478.052
2016	11	257.754
2016	12	297.41
2017	1	248.229
2017	2	548.774
2017	3	120.202
2017	4	329.884
2017	5	311.188
2017	6	203.521
2017	7	201.771
2017	8	124.79
2017	9	286.15
2017	10	294.735
2017	11	169.99
2017	12	147.159
2018	1	316.339
2018	2	698.16
2018	3	273.396
2018	4	260.533
2018	5	336.794
2018	6	206.089
2018	7	149.935
2018	8	119.304
2018	9	205.818
2018	10	175.26
2018	11	247.885
2018	12	208.23
2019	1	264.91
2019	2	210.585
2019	3	196.365
2019	4	480.834
2019	5	184.016
2019	6	136.119
2019	7	191.505
2019	8	119.81
2019	9	166.983
2019	10	180.145
2019	11	224.147
2019	12	159.756
2020	1	403.325
2020	2	291.389
2020	3	276.22
2020	4	332.845
2020	5	205.038
2020	6	327.48
2020	7	108.227
2020	8	189.109
2020	9	145.654
2020	10	326.415
2020	11	212.942
2020	12	202.507
2021	1	236.126
2021	2	390.982
2021	3	210.547
2021	4	261.569
2021	5	188.093
2021	6	176.837
2021	7	271.58
2021	8	176.206
2021	9	187.131
2021	10	195.296
2021	11	241.775
2021	12	328.985

## Sheet: MonthlyO3,BrO,OH,HO2(GEOS-Chem)
2017	H2O2_PBL (ppt)	O3_PBL (ppb)	NO_PBL (ppt)	NO2_PBL (ppt)	BrO_PBL (ppt)	OH_PBL (molecules/cm3)	HO2_PBL (molecules/cm3)
Jan	8.27977	28.4324	0.179556	17.4496	0.252762	3058.89	1.73989e+06
Feb	6.10928	27.08	0.962391	24.3533	0.756763	14762.6	5.05201e+06
Mar	29.2954	30.5601	2.92124	19.8588	0.376241	80639.5	2.00311e+07
Apr	66.9807	32.0033	4.49867	17.7461	0.369809	263160	4.78534e+07
May	214.33	32.3034	5.36773	16.0657	0.87248	680185	93094098
Jun	298.861	30.268	8.00636	20.655	0.351787	1026379	1.26927e+08
Jul	249.741	26.6594	7.6659	22.8922	0.160465	834362	1.10866e+08
Aug	326.248	29.861	7.22423	28.5121	0.0664438	630407	103205278
Sep	98.0994	28.5239	3.25051	23.1629	0.348875	155818	4.3397e+07
Oct	41.6235	29.2573	1.65465	30.3584	0.222902	52399.9	1.63179e+07
Nov	15.5208	29.2564	0.362118	18.2539	0.0992895	7320.08	3.96813e+06
Dec	11.6569	28.5357	0.139471	18.9523	0.0920152	3350.45	2.12163e+06
annual mean	113.896	29.3951	3.5194	21.5217	0.330819	312654	4.78812e+07
annual stdev	117.467	1.6559	2.86385	4.29094	0.242635	358204	4.57329e+07

## Sheet: The total O3 column (TCO)
Time_step	The total O3 column
weeks	dobson_units
0	327.679
1	343.679
2	354.429
3	360.429
4	368.679
5	364.429
6	360.179
7	342.429
8	335.179
9	357.464
10	382.75
11	396.679
12	395.143
13	408.107
14	388.143
15	387.071
16	398.464
17	414.5
18	362.786
19	365.929
20	371.143
21	359.5
22	344.929
23	337.179
24	327.464
25	328.643
26	326.5
27	322.107
28	306.429
29	302.536
30	296.036
31	321.964
32	305.5
33	293.857
34	290.679
35	297.179
36	297.214
37	283.964
38	265.5
39	280.536
40	291.536
41	247.464
42	277.964
43	282.964
44	285.964
45	307.964
46	308.464
47	305.714
48	281.714
49	289.339
50	304.964
51	309.714
